# Supplementary material for: A computational study on cobalt-catalyzed allylic substitution of racemic allylic carbonates with amines: inner-sphere C–N reductive elimination and origins of regio- and enantioselectivities
Source: Royal Society of Chemistry journal article supplement (doi:10.1039/d3qo00430a), 2023-01-01
Supplement: d3qo00430a1.pdf [file d3qo00430a1.pdf]

Supporting Information for:

**Computational Study on Cobalt-Catalyzed Allylic  
Substitution of Racemic Allylic Carbonates with Amines:  
Inner-Sphere C-N Reductive Elimination and Origins of  
Regio- and Enantioselectivities**

Zhen Shen, Hongli Wu, Jinjin Yang, Deping Kong, Jiaao Ge, Genping Huang\*

Department of Chemistry, School of Science and Tianjin Key Laboratory of  
Molecular Optoelectronic Sciences, Tianjin University, Tianjin 300072, P. R. China

E-mail: [gphuang@tju.edu.cn](mailto:gphuang@tju.edu.cn)

## Table of Contents:

|           |                                                                                                                                   |
|-----------|-----------------------------------------------------------------------------------------------------------------------------------|
| Page S3:  | Possibility of the Co(0)/NPN complex as the active catalytic species                                                              |
| Page S4:  | C–O oxidative addition via S <sub>N</sub> 2 front-side attack transition states                                                   |
| Page S5:  | Other possibilities of S <sub>N</sub> 2 back-side attack pathway                                                                  |
| Page S6:  | Other possibilities of outer-sphere nucleophilic attack                                                                           |
| Page S8:  | CO <sub>2</sub> extrusion from the carbonate-coordinated $\eta^3$ -allyl-Co(III) species                                          |
| Page S9:  | $\eta^1$ - $\eta^3$ isomerization                                                                                                 |
| Page S10: | Proton transfer                                                                                                                   |
| Page S11: | Isomerization between <b>IM10</b> and <b>IM11</b>                                                                                 |
| Page S12: | Other possibilities of C-N reductive elimination                                                                                  |
| Page S14: | Optimized geometries of key transition states                                                                                     |
| Page S15: | Non-covalent interactions analysis of ( <i>R</i> )- <b>TS5</b> <sup>triplet</sup> and ( <i>S</i> )- <b>TS5</b> <sup>triplet</sup> |
| Page S16: | Rearrangement of the coordinating O atom of the OCO <sub>2</sub> Me anion                                                         |
| Page S17: | Overall catalytic cycle                                                                                                           |
| Page S18: | Table of calculated energies and energy corrections                                                                               |
| Page S20: | Cartesian coordinates                                                                                                             |

## Possibility of the Co(0)/NPN complex as the active catalytic species

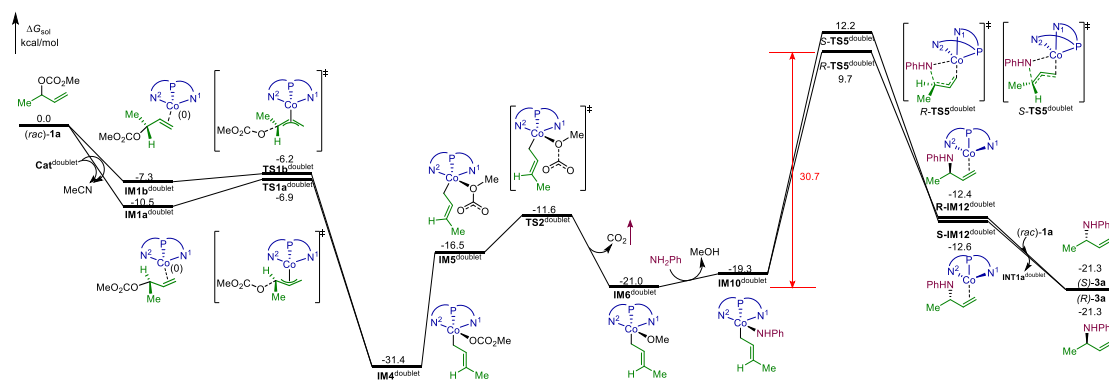

**Figure S1.** Calculated energy profile of Co(0)/NPN-catalyzed reaction. The energy barrier was calculated relative to  $\text{IM6}^{\text{doublet}}$  rather than  $\text{IM4}^{\text{doublet}}$ , due to that the  $\text{CO}_2$  extrusion is irreversible.

## C–O oxidative addition via S<sub>N</sub>2 front-side attack transition states

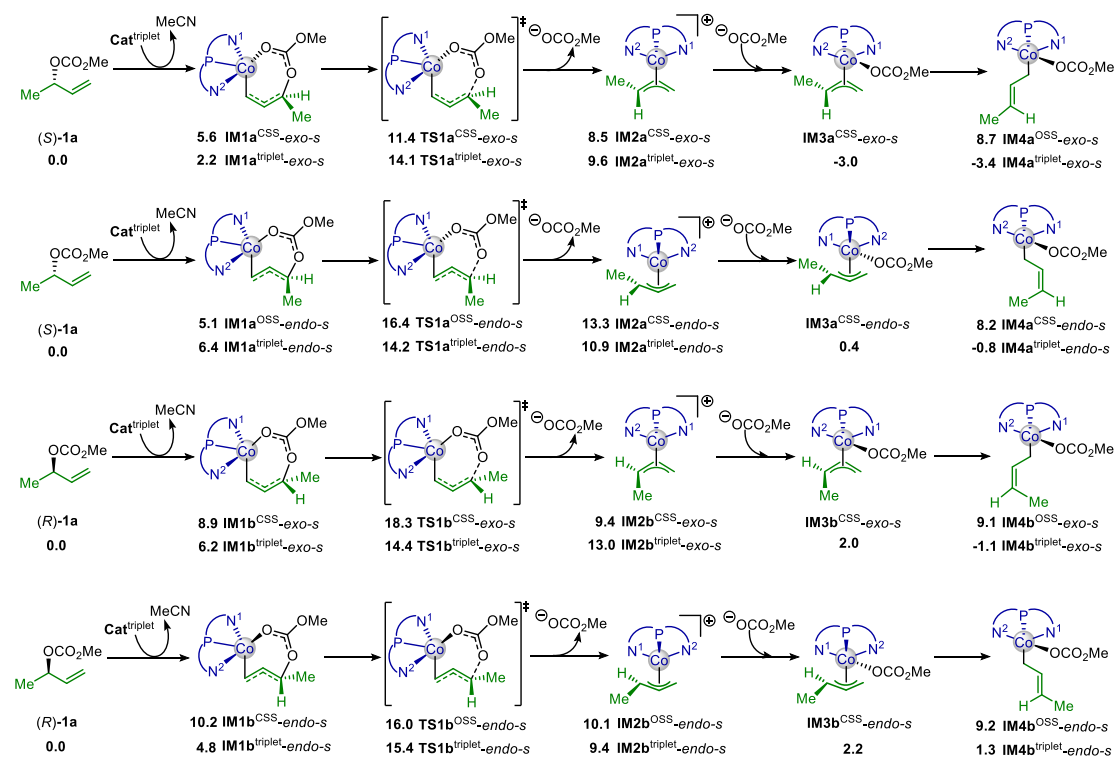

**Figure S2.** Calculated energies of C–O oxidative addition via S<sub>N</sub>2 front-side attack transition states. Gibbs free energies are given in kcal/mol.

## Other possibilities of S<sub>N</sub>2 back-side attack pathway

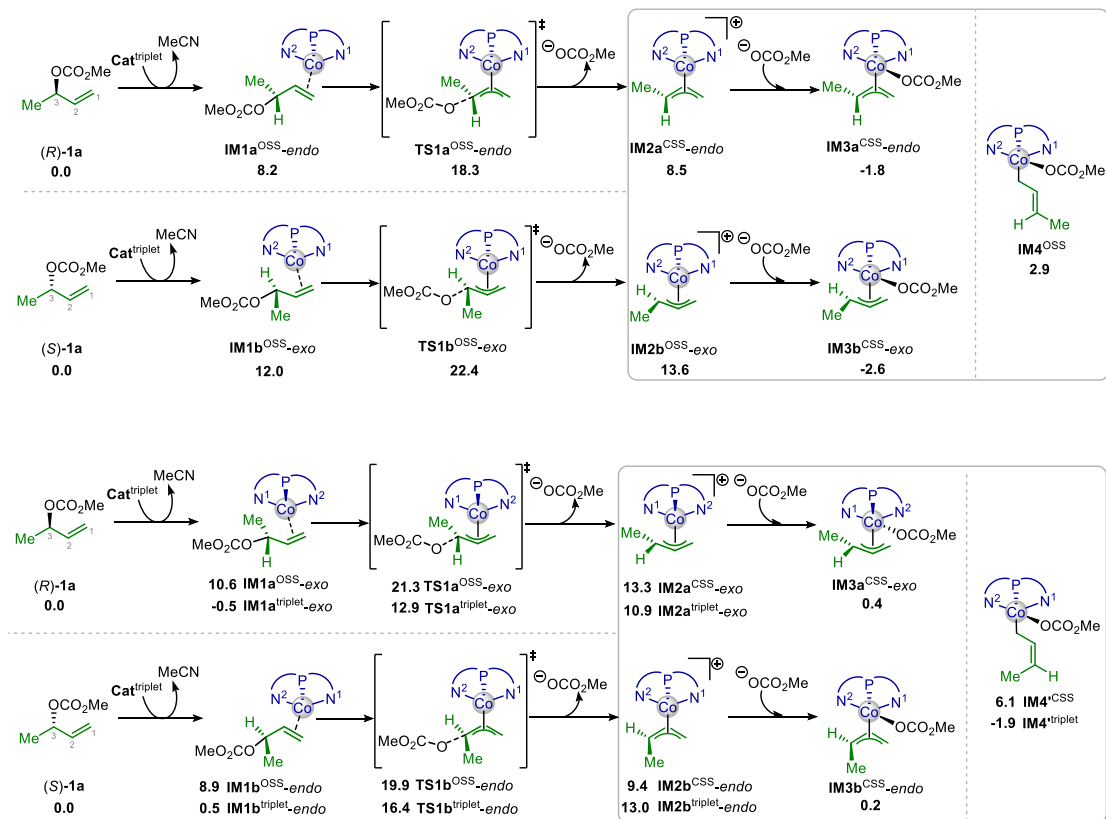

**Figure S3.** Calculated energies of other possibilities of S<sub>N</sub>2 back-side attack pathway. Gibbs free energies are given in kcal/mol.

## Other possibilities of outer-sphere nucleophilic attack

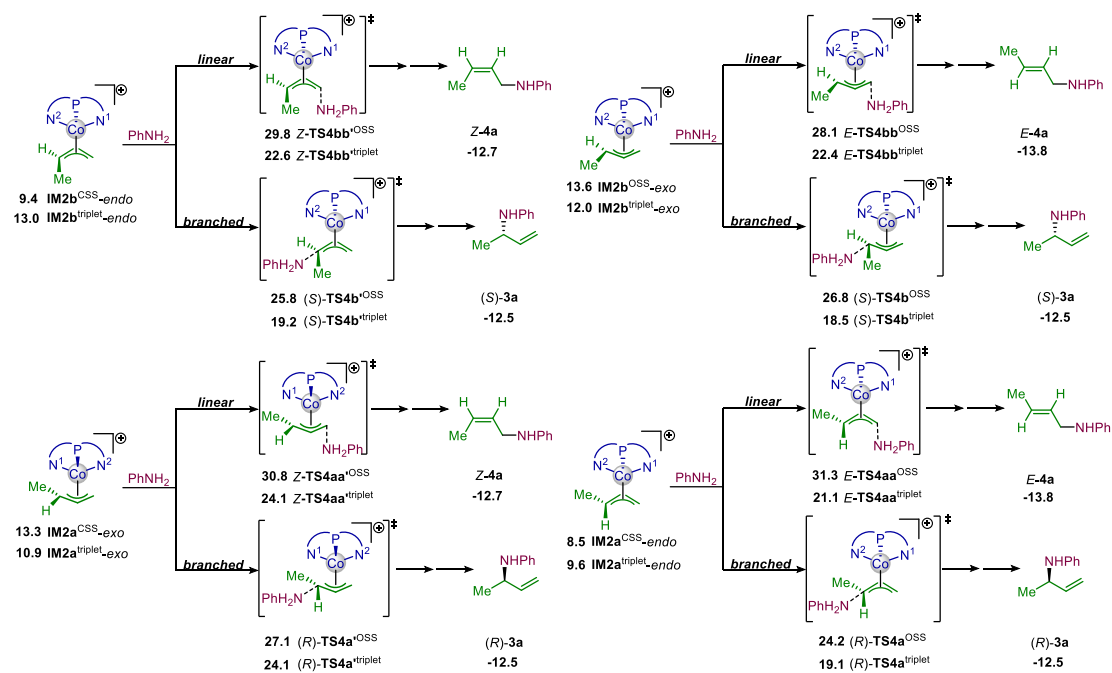

**Figure S4.** Calculated energies of outer-sphere nucleophilic attack from **IM2**. Gibbs free energies are given in kcal/mol.

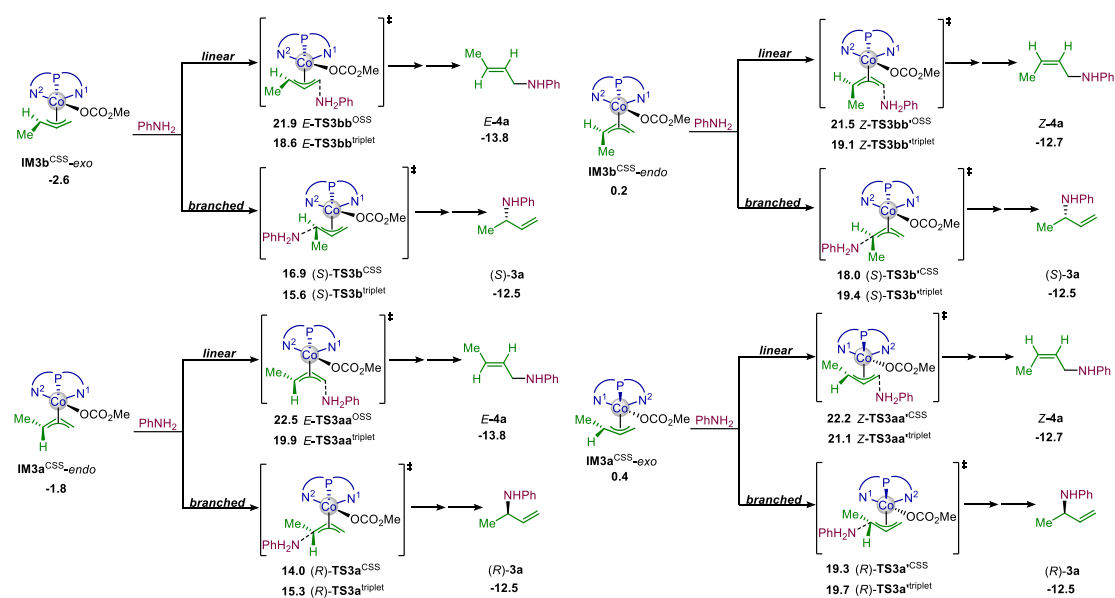

**Figure S5.** Calculated energies of outer-sphere nucleophilic attack from **IM3**. Gibbs free energies are given in kcal/mol.

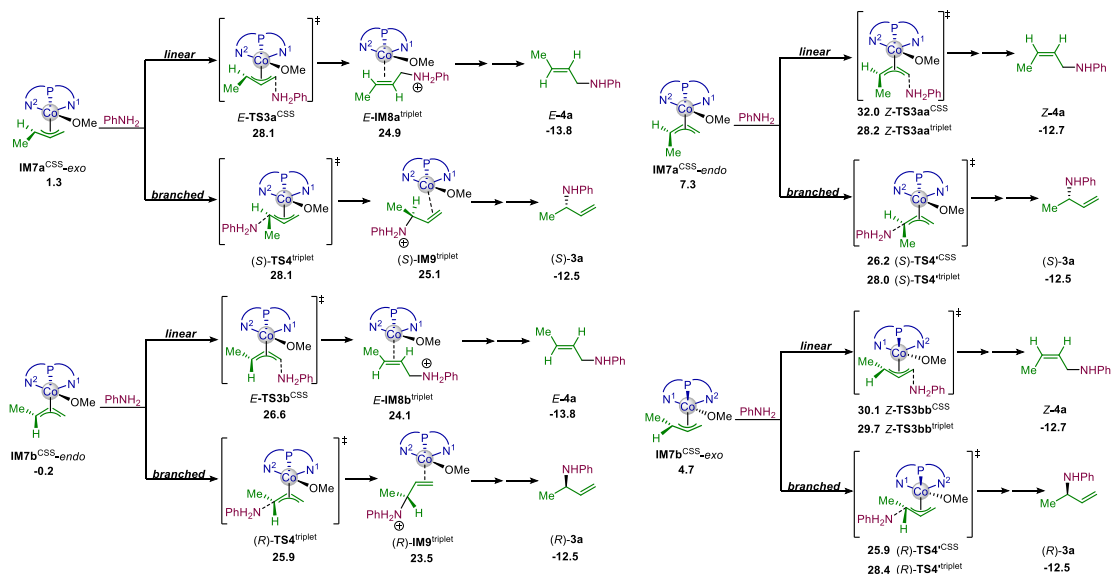

**Figure S6.** Calculated energies of outer-sphere nucleophilic attack from IM7. Gibbs free energies are given in kcal/mol.

CO<sub>2</sub> extrusion from the carbonate-coordinated  $\eta^3$ -allyl-Co(III) species

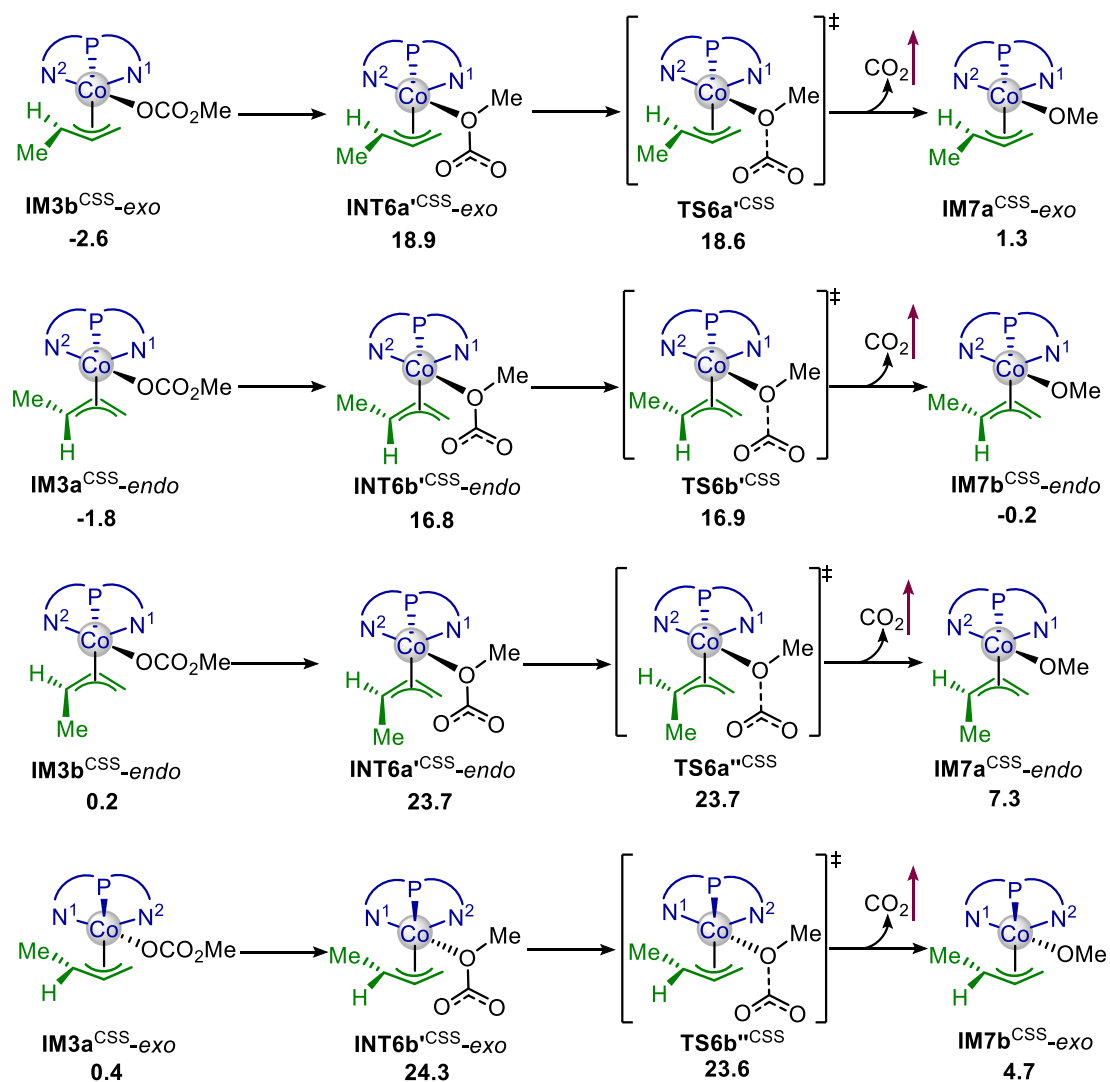

**Figure S7.** Calculated energies of CO<sub>2</sub> extrusion from the carbonate-coordinated  $\eta^3$ -allyl-Co(III) species. Gibbs free energies are given in kcal/mol.



## $\eta^1$ - $\eta^3$ isomerization

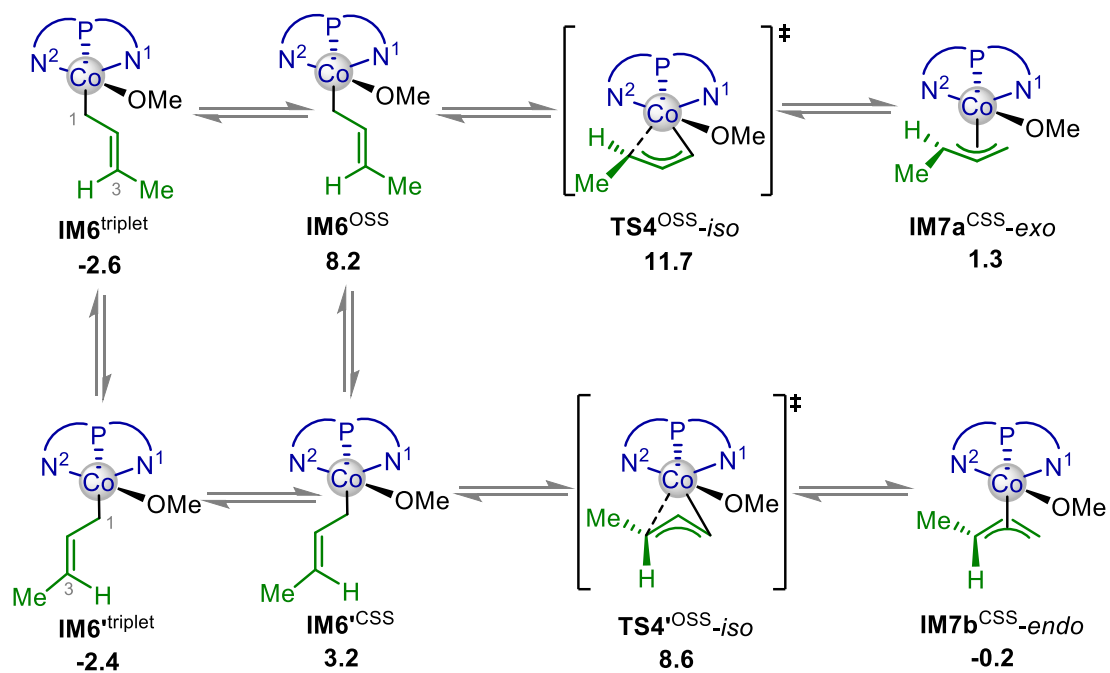

**Figure S8.** Calculated energies of  $\eta^1$ - $\eta^3$  isomerization. Gibbs free energies are given in kcal/mol.

## Proton transfer

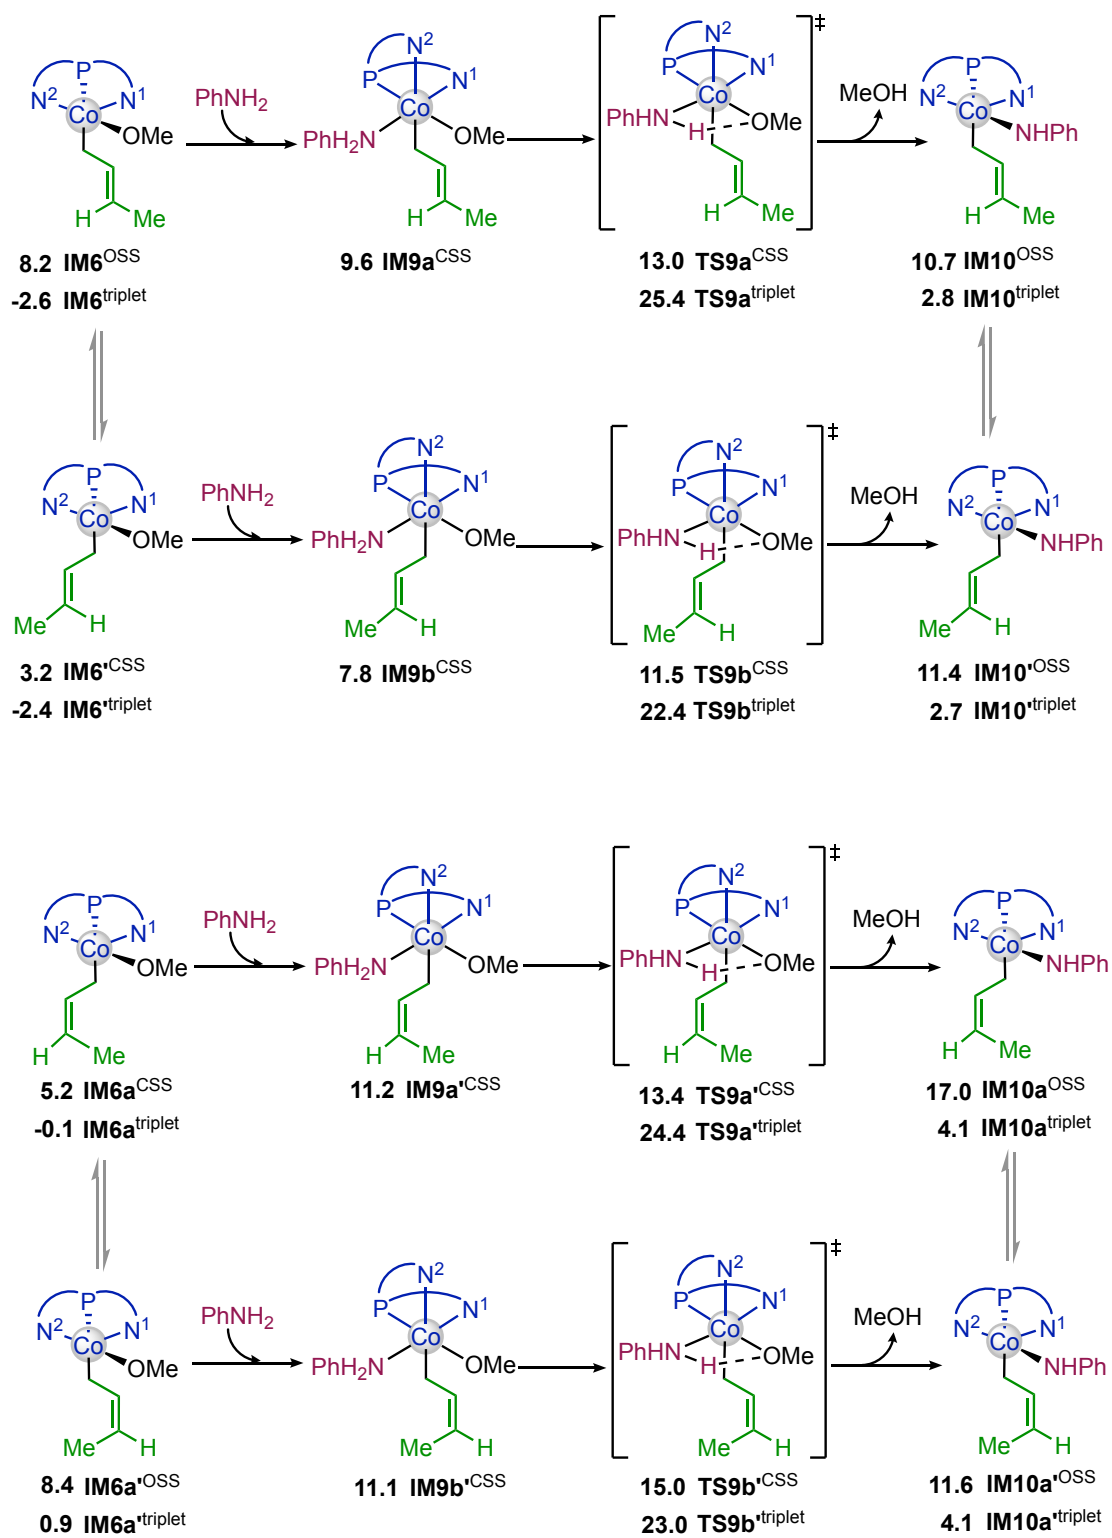

**Figure S9.** Calculated energies of proton transfer process. Gibbs free energies are given in kcal/mol.

## Isomerization between IM10 and IM11

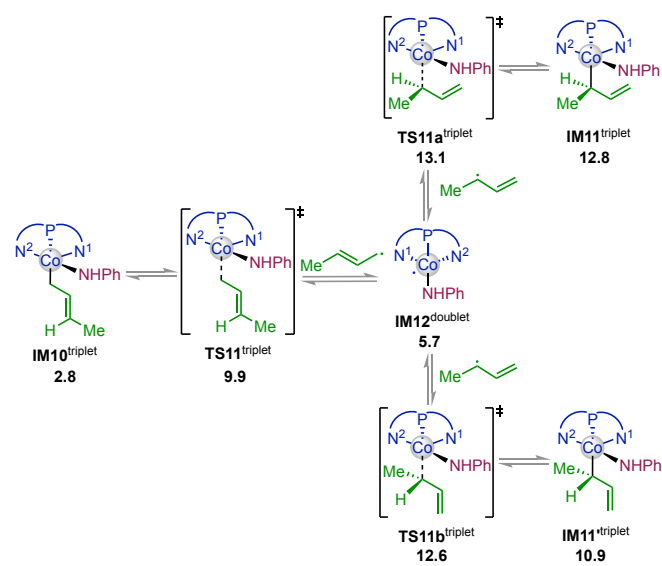

**Figure S10.** Calculated energies of isomerization between IM10 and IM11. Gibbs free energies are given in kcal/mol.

## Other possibilities of C-N reductive elimination<sup>11</sup>

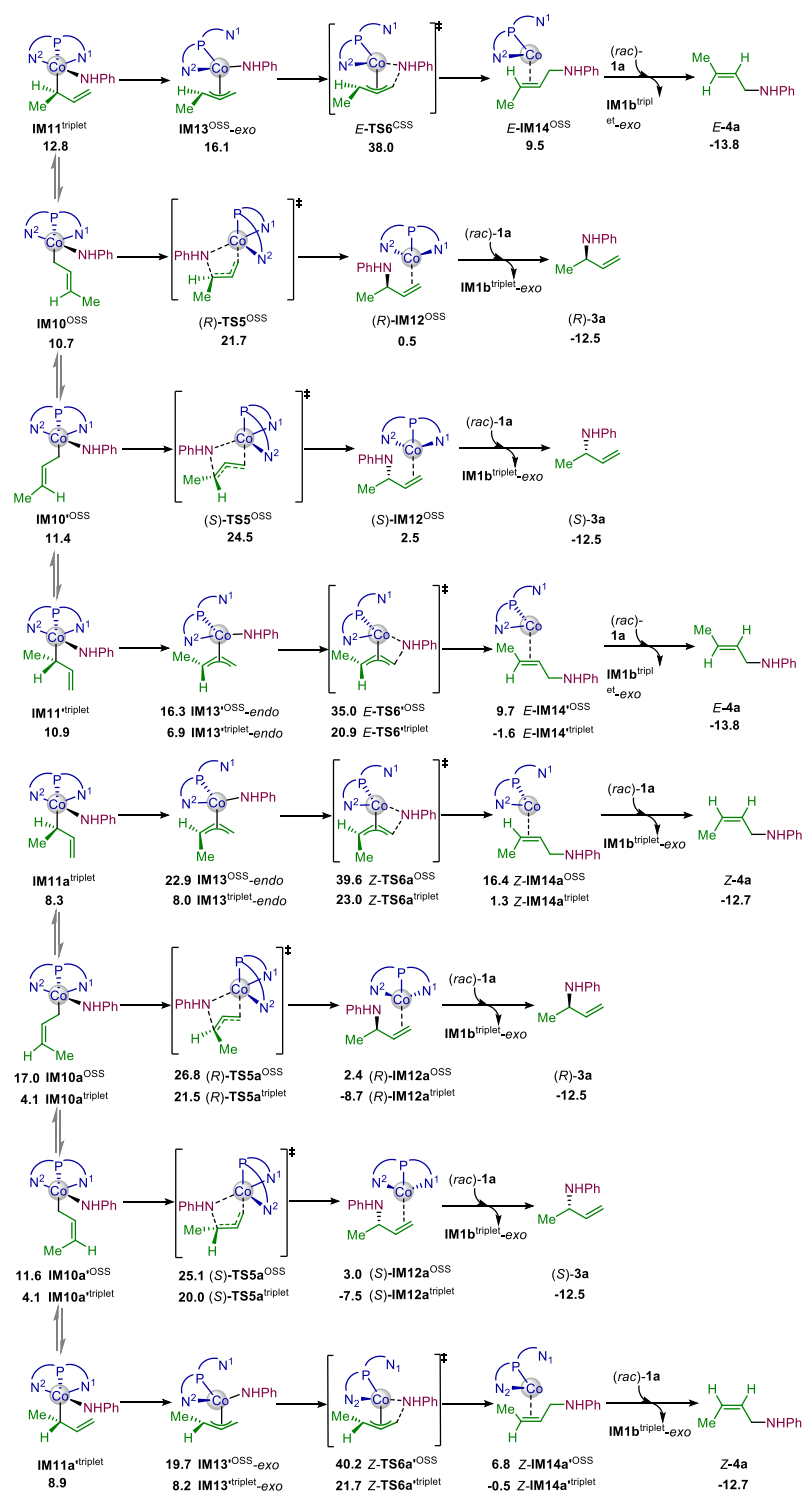

**Figure S11.** Calculated energies of C-N reductive elimination from **IM10** and **IM11**. Gibbs free energies are given in kcal/mol.

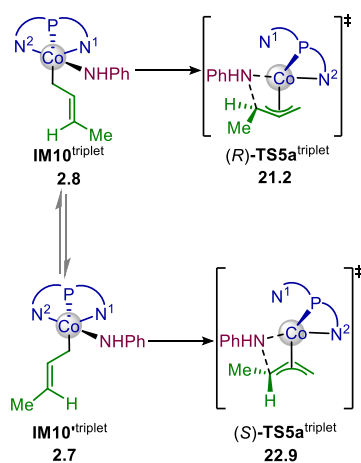

**Figure S12.** Calculated energies of C-N reductive elimination leading brached products via  $\eta^3$ -transition states. Gibbs free energies are given in kcal/mol.

Optimized geometries of key transition states

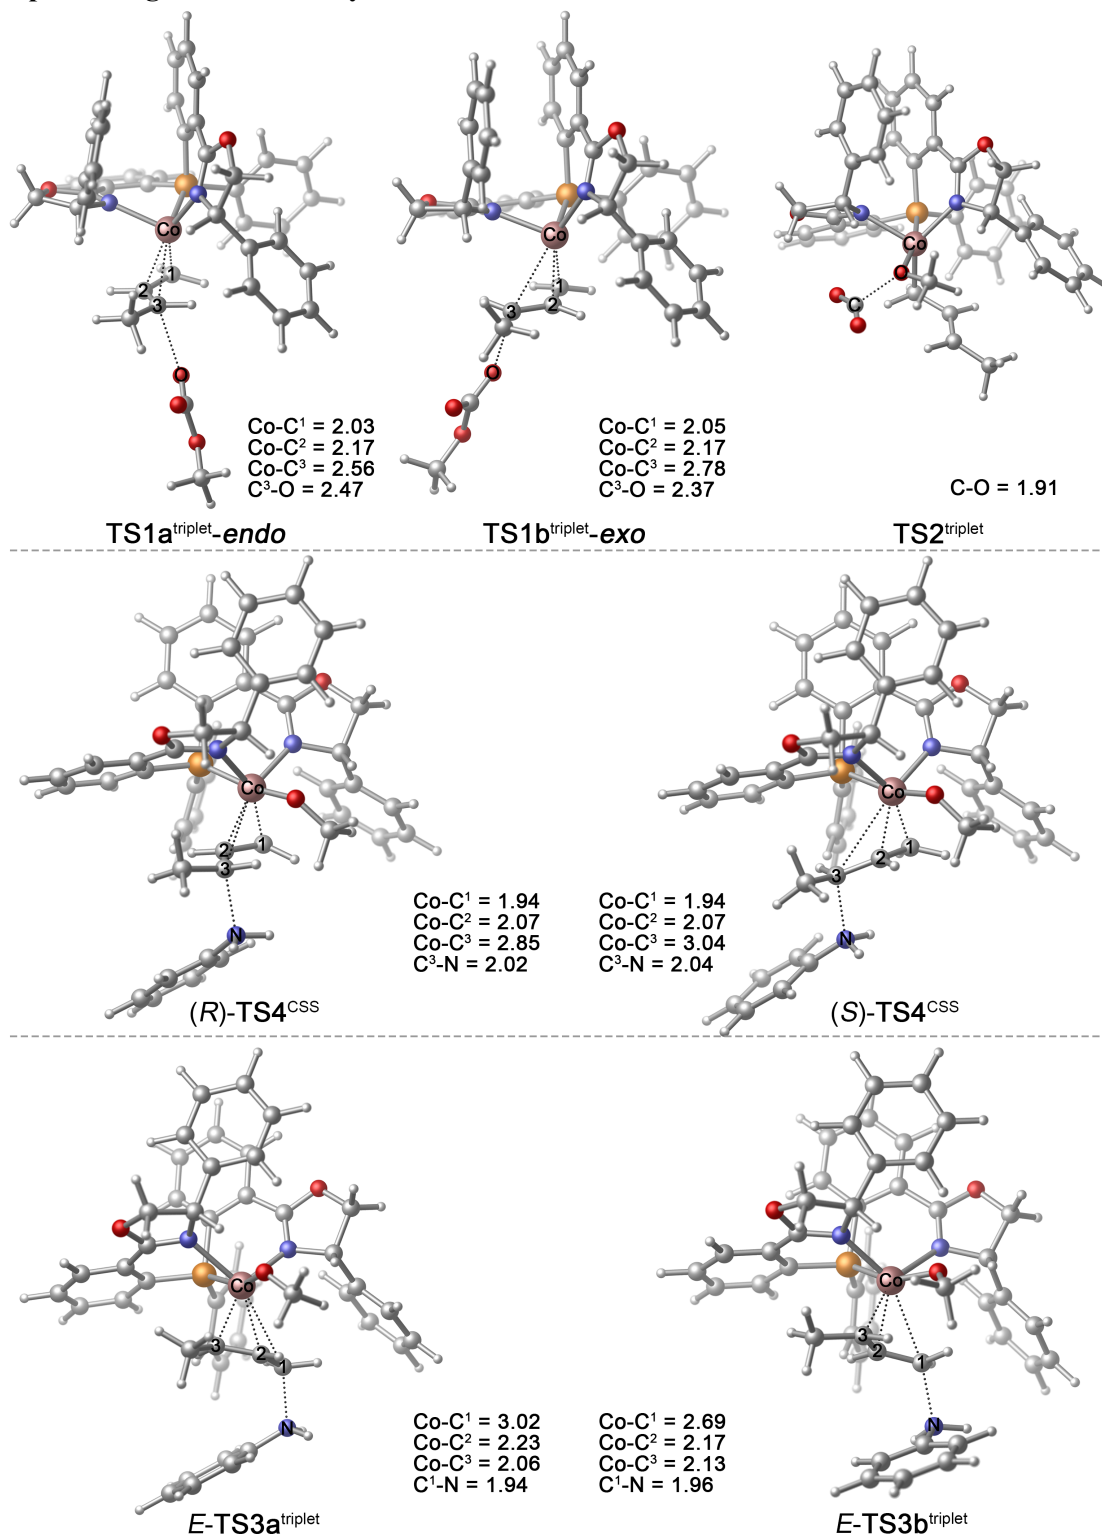

**Figure S13.** Optimized geometries of key transition states involved in the main pathway. Bond distances are given in Å.

Non-covalent interactions analysis of (*R*)-TS5<sup>triplet</sup> and (*S*)-TS5<sup>triplet</sup>

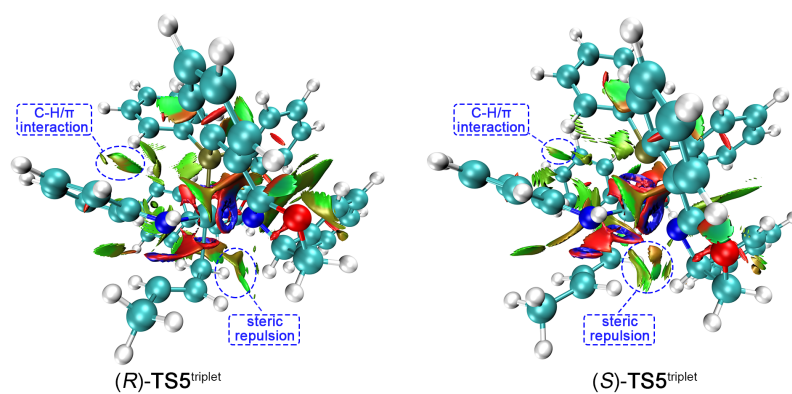

**Figure S14.** Non-covalent interactions analysis of (*R*)-TS5<sup>triplet</sup> and (*S*)-TS5<sup>triplet</sup>.

### Rearrangement of the coordinating O atom of the OCO<sub>2</sub>Me anion

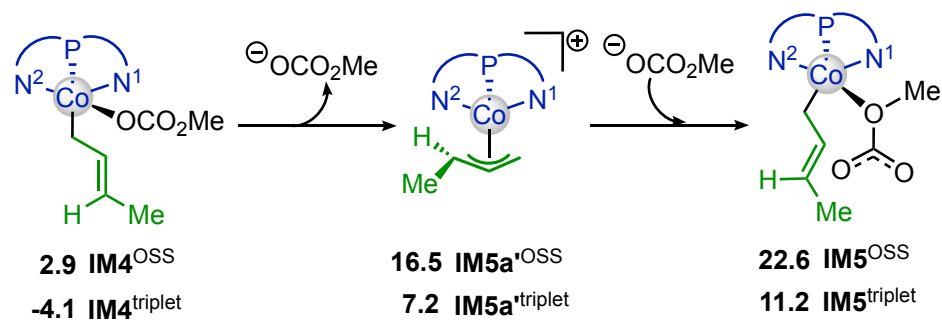

**Figure S15.** Calculated energies of rearrangement of the coordinating O atom of the OCO<sub>2</sub>Me anion. Gibbs free energies are given in kcal/mol.



## Overall catalytic cycle

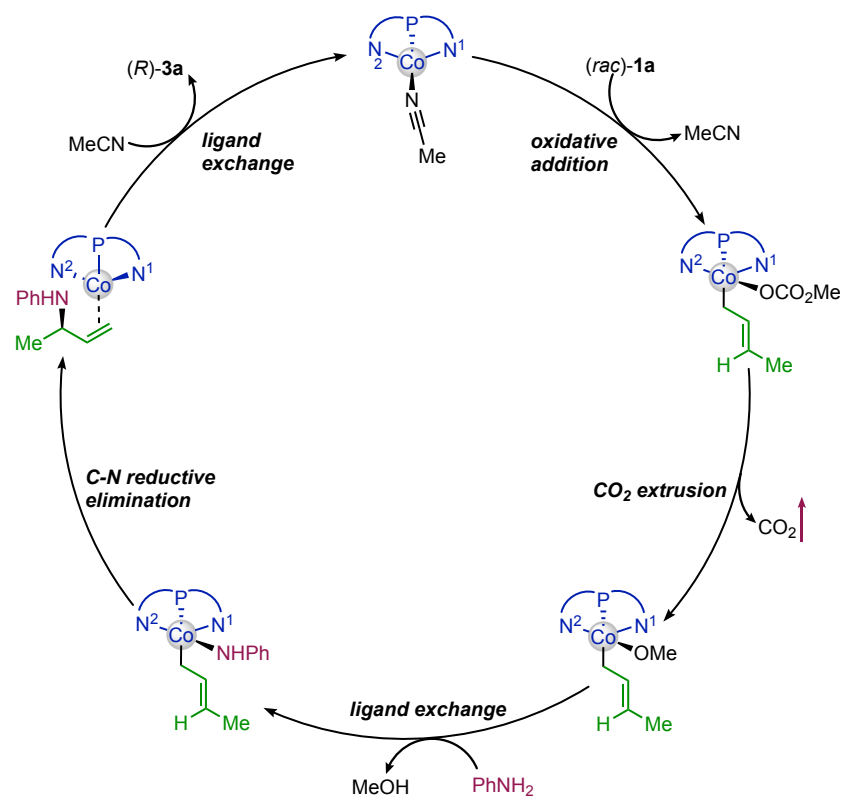

**Scheme S1.** Overall catalytic cycle.

Table of calculated energies and energy corrections

| Stationary point                             | Single-point energy<br>(U)TPSSh-SMD/<br>Def2-TZVPP<br>(a.u.) | Thermal<br>correction to<br>Gibbs free energy<br>at 298.15 K<br>(a.u.) | DFT-D3(BJ)<br>correction<br>(kcal/mol) |
|----------------------------------------------|--------------------------------------------------------------|------------------------------------------------------------------------|----------------------------------------|
| ( <i>R</i> )- <b>1a</b>                      | -460.5335721                                                 | 0.119379                                                               | -10.9859                               |
| ( <i>S</i> )- <b>1a</b>                      | -460.5335721                                                 | 0.119379                                                               | -10.9859                               |
| <b>Cat</b> <sup>triplet</sup>                | -3506.9661900                                                | 0.527605                                                               | -101.9035                              |
| MeCN                                         | -132.8225051                                                 | 0.021037                                                               | -1.9484                                |
| PhNH <sub>2</sub>                            | -287.7456990                                                 | 0.087366                                                               | -9.5631                                |
| CO <sub>2</sub>                              | -188.6682277                                                 | -0.009138                                                              | -0.6493                                |
| MeOH                                         | -115.7799784                                                 | 0.028080                                                               | -1.2594                                |
| <sup>-</sup> OCO <sub>2</sub> Me             | -303.9739983                                                 | 0.025487                                                               | -3.1462                                |
| ( <i>R</i> )- <b>3a</b>                      | -443.8282030                                                 | 0.168005                                                               | -18.8082                               |
| ( <i>S</i> )- <b>3a</b>                      | -443.8282030                                                 | 0.168005                                                               | -18.8082                               |
| <i>E</i> - <b>4a</b>                         | -443.8331260                                                 | 0.167889                                                               | -17.0113                               |
| <b>IM1a</b> <sup>triplet</sup> - <i>endo</i> | -3834.6741615                                                | 0.634581                                                               | -119.7908                              |
| <b>IM1b</b> <sup>triplet</sup> - <i>exo</i>  | -3834.6732431                                                | 0.632843                                                               | -119.4720                              |
| <b>TS1a</b> <sup>triplet</sup> - <i>endo</i> | -3834.6482408                                                | 0.629611                                                               | -120.8347                              |
| <b>TS1b</b> <sup>triplet</sup> - <i>exo</i>  | -3834.6443486                                                | 0.628535                                                               | -119.2921                              |
| <b>IM2a</b> <sup>triplet</sup> - <i>endo</i> | -3530.6651443                                                | 0.587475                                                               | -114.0060                              |
| <b>IM2b</b> <sup>triplet</sup> - <i>exo</i>  | -3530.6609962                                                | 0.587294                                                               | -114.0250                              |
| <b>IM3a</b> <sup>CSS</sup> - <i>endo</i>     | -3834.6672304                                                | 0.641757                                                               | -128.9139                              |
| <b>IM3b</b> <sup>CSS</sup> - <i>exo</i>      | -3834.6681535                                                | 0.640358                                                               | -128.2663                              |
| <b>IM4</b> <sup>triplet</sup>                | -3834.6681421                                                | 0.631628                                                               | -124.2928                              |
| <b>IM5</b> <sup>triplet</sup>                | -3834.6397999                                                | 0.633222                                                               | -127.7682                              |
| <b>TS2</b> <sup>triplet</sup>                | -3834.6377792                                                | 0.632627                                                               | -128.0152                              |
| <b>IM6</b> <sup>triplet</sup>                | -3645.9844678                                                | 0.621328                                                               | -119.7097                              |
| <b>IM6</b> <sup>*triplet</sup>               | -3645.9843424                                                | 0.621821                                                               | -119.9093                              |
| <b>IM7a</b> <sup>CSS</sup> - <i>exo</i>      | -3645.9795718                                                | 0.629704                                                               | -124.0849                              |
| <b>IM7b</b> <sup>CSS</sup> - <i>endo</i>     | -3645.9816606                                                | 0.630106                                                               | -124.5684                              |
| ( <i>R</i> )- <b>TS4</b> <sup>CSS</sup>      | -3933.7037524                                                | 0.738034                                                               | -140.5110                              |
| ( <i>S</i> )- <b>TS4</b> <sup>CSS</sup>      | -3933.7001459                                                | 0.736709                                                               | -140.2193                              |
| <i>E</i> - <b>TS3a</b> <sup>triplet</sup>    | -3933.6901733                                                | 0.730429                                                               | -138.7210                              |
| <i>E</i> - <b>TS3b</b> <sup>triplet</sup>    | -3933.6895668                                                | 0.727649                                                               | -138.2684                              |

|                                             |               |          |           |
|---------------------------------------------|---------------|----------|-----------|
| <i>(R)</i> - <b>IM9</b> <sup>CSS</sup>      | -3933.7106148 | 0.741671 | -140.5289 |
| <i>(S)</i> - <b>IM9</b> <sup>CSS</sup>      | -3933.7077722 | 0.741399 | -140.6046 |
| <i>E</i> - <b>IM8a</b> <sup>CSS</sup>       | -3933.7014636 | 0.741083 | -140.4012 |
| <i>E</i> - <b>IM8b</b> <sup>CSS</sup>       | -3933.7038229 | 0.742441 | -142.1036 |
| <b>IM10</b> <sup>triplet</sup>              | -3817.9347473 | 0.682055 | -133.1782 |
| <b>IM10'</b> <sup>triplet</sup>             | -3817.9353065 | 0.682023 | -132.8749 |
| <b>IM11</b> <sup>triplet</sup>              | -3817.9132049 | 0.682676 | -137.0865 |
| <b>IM13</b> <sup>triplet</sup> - <i>exo</i> | -3817.9305957 | 0.683598 | -133.9308 |
| <i>(R)</i> - <b>TS5</b> <sup>triplet</sup>  | -3817.9061460 | 0.683423 | -138.0581 |
| <i>(S)</i> - <b>TS5</b> <sup>triplet</sup>  | -3817.9035598 | 0.683281 | -136.9066 |
| <i>E</i> - <b>TS6</b> <sup>triplet</sup>    | -3817.9094865 | 0.680753 | -131.1895 |
| <i>(R)</i> - <b>IM12</b> <sup>triplet</sup> | -3817.9666316 | 0.684026 | -129.5879 |
| <i>(S)</i> - <b>IM12</b> <sup>triplet</sup> | -3817.9662107 | 0.684812 | -129.1044 |
| <i>E</i> - <b>IM14</b> <sup>triplet</sup>   | -3817.9492710 | 0.684067 | -131.1320 |

**Cartesian coordinates****(R)-1a**

|   |             |             |            |
|---|-------------|-------------|------------|
| C | -2.81128700 | 1.02211400  | 4.24126800 |
| H | -2.77682200 | -0.05377100 | 4.04370800 |
| H | -2.75740200 | 1.33708700  | 5.28906900 |
| C | -2.90750000 | 1.91170300  | 3.24703500 |
| H | -2.96148200 | 1.57597400  | 2.20358600 |
| C | -2.92548300 | 3.40284700  | 3.44790600 |
| H | -2.92900700 | 3.63995700  | 4.52141100 |
| O | -4.15935800 | 3.93994900  | 2.86959700 |
| C | -5.24352000 | 3.93444600  | 3.65091800 |
| O | -5.29787100 | 3.58684400  | 4.81087900 |
| O | -6.26980600 | 4.39627500  | 2.92968700 |
| C | -7.52449200 | 4.47836800  | 3.62420100 |
| H | -7.44660100 | 5.15743500  | 4.48594000 |
| H | -8.24028200 | 4.87423900  | 2.89398400 |
| H | -7.84301600 | 3.48296500  | 3.96698400 |
| C | -1.78816500 | 4.11873500  | 2.73614600 |
| H | -1.86897500 | 5.20654000  | 2.88493100 |
| H | -0.82479400 | 3.77868100  | 3.14491100 |
| H | -1.80483700 | 3.90599800  | 1.65565900 |

**(S)-1a**

|   |             |             |             |
|---|-------------|-------------|-------------|
| C | -2.81128700 | 1.02211400  | -4.24126800 |
| H | -2.77682200 | -0.05377100 | -4.04370800 |
| H | -2.75740200 | 1.33708700  | -5.28906900 |
| C | -2.90750000 | 1.91170300  | -3.24703500 |
| H | -2.96148200 | 1.57597400  | -2.20358600 |
| C | -2.92548300 | 3.40284700  | -3.44790600 |
| H | -2.92900700 | 3.63995700  | -4.52141100 |
| O | -4.15935800 | 3.93994900  | -2.86959700 |
| C | -5.24352000 | 3.93444600  | -3.65091800 |
| O | -5.29787100 | 3.58684400  | -4.81087900 |
| O | -6.26980600 | 4.39627500  | -2.92968700 |
| C | -7.52449200 | 4.47836800  | -3.62420100 |
| H | -7.44660100 | 5.15743500  | -4.48594000 |
| H | -8.24028200 | 4.87423900  | -2.89398400 |
| H | -7.84301600 | 3.48296500  | -3.96698400 |
| C | -1.78816500 | 4.11873500  | -2.73614600 |
| H | -1.86897500 | 5.20654000  | -2.88493100 |
| H | -0.82479400 | 3.77868100  | -3.14491100 |
| H | -1.80483700 | 3.90599800  | -1.65565900 |

**Cat<sup>triplet</sup>**

|    |            |            |            |
|----|------------|------------|------------|
| Co | 9.06692900 | 6.75438300 | 3.68451300 |
| C  | 6.17510100 | 7.53336400 | 2.23996400 |

|   |             |             |             |
|---|-------------|-------------|-------------|
| O | 8.43980900  | 10.38030000 | 5.78003300  |
| N | 8.93172000  | 8.64940900  | 4.43050400  |
| P | 6.85166500  | 6.61504500  | 3.70685700  |
| N | 9.11877100  | 6.78324400  | 1.67357200  |
| O | 8.51542800  | 6.65779700  | -0.48376300 |
| C | 4.93626700  | 8.19082700  | 2.32617800  |
| H | 4.39365700  | 8.18578400  | 3.27370800  |
| N | 9.81096100  | 5.93059100  | 5.28416600  |
| C | 4.37079700  | 8.84205500  | 1.22500000  |
| H | 3.40676200  | 9.34558400  | 1.32935900  |
| C | 5.03673800  | 8.83492400  | -0.00390200 |
| H | 4.60288700  | 9.33383200  | -0.87339700 |
| C | 6.26914400  | 8.19188800  | -0.11608900 |
| H | 6.80161000  | 8.19405900  | -1.06808100 |
| C | 6.86054500  | 7.55488200  | 0.99419600  |
| C | 8.19681700  | 6.97078400  | 0.78477000  |
| C | 10.32762600 | 6.26809500  | 0.98818100  |
| H | 11.09815900 | 7.05315300  | 1.02819200  |
| C | 9.83906400  | 6.06151200  | -0.46662700 |
| H | 10.45676400 | 6.57901300  | -1.21103800 |
| H | 9.73185400  | 5.00202600  | -0.74065300 |
| C | 4.33041300  | 7.78641800  | 6.78267800  |
| H | 3.38690000  | 7.42783300  | 7.20106300  |
| C | 4.91174900  | 7.11330000  | 5.70443800  |
| H | 4.40485200  | 6.23859800  | 5.29235600  |
| C | 6.12336900  | 7.53747300  | 5.13078300  |
| C | 6.16130200  | 9.35819900  | 6.76301300  |
| H | 6.65725100  | 10.23538900 | 7.17855100  |
| C | 4.95592000  | 8.92012000  | 7.30928400  |
| H | 4.51116100  | 9.46179000  | 8.14712100  |
| C | 8.07478900  | 9.19920900  | 5.23419500  |
| C | 6.77176700  | 8.68027800  | 5.68499700  |
| C | 9.71345200  | 10.75280400 | 5.20854400  |
| H | 10.40169000 | 10.99828600 | 6.02733600  |
| H | 9.55623800  | 11.64080800 | 4.57873300  |
| C | 10.14282400 | 9.50694300  | 4.39823400  |
| H | 10.94345700 | 8.96028400  | 4.92157800  |
| C | 5.89903800  | 5.03411400  | 3.67738800  |
| C | 6.30661100  | 4.04339100  | 4.59429400  |
| H | 7.11819200  | 4.25678300  | 5.29620300  |
| C | 5.68422800  | 2.79238900  | 4.61430700  |
| C | 4.66122100  | 2.50268000  | 3.70123300  |
| C | 4.26308300  | 3.47229500  | 2.77472700  |
| C | 4.87499500  | 4.73262100  | 2.76226700  |

|                   |             |             |             |
|-------------------|-------------|-------------|-------------|
| H                 | 4.54772600  | 5.47968100  | 2.03580000  |
| C                 | 10.30169100 | 5.41886600  | 6.20874000  |
| C                 | 10.89971200 | 4.77459200  | 7.36360000  |
| H                 | 11.18259000 | 3.74234900  | 7.10660900  |
| H                 | 10.17782300 | 4.75563300  | 8.19455100  |
| H                 | 11.79797600 | 5.32788300  | 7.67723800  |
| C                 | 10.86951200 | 5.02828500  | 1.67534700  |
| C                 | 12.23905700 | 4.91867200  | 1.96128700  |
| C                 | 10.01164300 | 3.97093900  | 2.02931700  |
| C                 | 12.74629000 | 3.77335600  | 2.58725900  |
| H                 | 12.91185100 | 5.73840400  | 1.69405600  |
| C                 | 10.51709400 | 2.82880700  | 2.65874800  |
| H                 | 8.94197300  | 4.04311000  | 1.81461200  |
| C                 | 11.88627300 | 2.72655200  | 2.93867500  |
| H                 | 13.81524600 | 3.70143200  | 2.80407600  |
| H                 | 9.83948000  | 2.01590900  | 2.93244400  |
| H                 | 12.28057600 | 1.83349900  | 3.43034300  |
| C                 | 10.61856100 | 9.81966800  | 2.99264500  |
| C                 | 11.96439500 | 9.62979500  | 2.64320700  |
| C                 | 9.73366700  | 10.33979500 | 2.03206600  |
| C                 | 12.42078200 | 9.95297300  | 1.35850000  |
| H                 | 12.66065300 | 9.22591000  | 3.38379400  |
| C                 | 10.18555000 | 10.65673900 | 0.74762300  |
| H                 | 8.68161700  | 10.49025200 | 2.28970800  |
| C                 | 11.53192500 | 10.46500200 | 0.40705900  |
| H                 | 13.47257000 | 9.80166000  | 1.10201300  |
| H                 | 9.48526300  | 11.05535700 | 0.00891900  |
| H                 | 11.88514100 | 10.71522700 | -0.59662700 |
| H                 | 3.46901600  | 3.25129100  | 2.05673800  |
| H                 | 4.18046100  | 1.52117000  | 3.70945400  |
| H                 | 6.00520900  | 2.03789100  | 5.33716800  |
| MeCN              |             |             |             |
| N                 | 11.00396600 | 6.59761700  | 4.64501900  |
| C                 | 12.05496400 | 6.43825000  | 5.11707400  |
| C                 | 13.36995600 | 6.24042200  | 5.70827400  |
| H                 | 13.56713000 | 5.16469900  | 5.82853300  |
| H                 | 13.41301600 | 6.72680700  | 6.69412100  |
| H                 | 14.14166900 | 6.67730400  | 5.05707900  |
| PhNH <sub>2</sub> |             |             |             |
| N                 | 0.73405600  | 6.29562200  | -1.66347400 |
| H                 | 0.20911900  | 6.59322400  | -0.84429400 |
| C                 | 2.10342400  | 6.48598200  | -1.61169000 |
| C                 | 2.97184900  | 5.75081100  | -2.45206600 |
| C                 | 2.66971800  | 7.46321300  | -0.75994600 |

|                                  |             |             |             |
|----------------------------------|-------------|-------------|-------------|
| C                                | 4.34779500  | 5.99174200  | -2.43977800 |
| H                                | 2.55226800  | 4.98807400  | -3.11455500 |
| C                                | 4.04741900  | 7.69401900  | -0.75779900 |
| H                                | 2.01382200  | 8.03843500  | -0.09984100 |
| C                                | 4.90208200  | 6.96431000  | -1.59588600 |
| H                                | 4.99564000  | 5.40656900  | -3.09901200 |
| H                                | 4.45802700  | 8.45460900  | -0.08727400 |
| H                                | 5.97916500  | 7.14785900  | -1.58937700 |
| H                                | 0.41990100  | 5.39806900  | -2.02537400 |
| CO <sub>2</sub>                  |             |             |             |
| C                                | -0.83769600 | 0.56282700  | 0.00000000  |
| O                                | 0.32840700  | 0.56282700  | 0.00000000  |
| O                                | -2.00379900 | 0.56282700  | 0.00000000  |
| MeOH                             |             |             |             |
| C                                | -0.64698700 | 5.77471000  | 0.24391300  |
| H                                | -0.29064400 | 6.34254900  | 1.12597100  |
| H                                | -0.27731600 | 6.28756900  | -0.65785300 |
| H                                | -1.75374500 | 5.82358800  | 0.23097000  |
| O                                | -0.15564000 | 4.44824700  | 0.20984600  |
| H                                | -0.48793500 | 3.99880200  | 1.00438200  |
| <sup>-</sup> OCO <sub>2</sub> Me |             |             |             |
| O                                | 9.20119600  | 3.35531000  | 26.15117000 |
| C                                | 9.93555800  | 3.65568500  | 25.19658300 |
| O                                | 10.90472500 | 3.06730100  | 24.67798600 |
| O                                | 9.57767200  | 4.91587300  | 24.60365300 |
| C                                | 10.36900500 | 5.32325400  | 23.51303000 |
| H                                | 10.32756000 | 4.60920400  | 22.66870200 |
| H                                | 9.97737200  | 6.29744500  | 23.17307500 |
| H                                | 11.43506200 | 5.44386900  | 23.78383400 |
| <b>(R)-3a</b>                    |             |             |             |
| C                                | -3.55210100 | 0.10975200  | 3.02045000  |
| H                                | -3.37821800 | -0.82672700 | 2.48157000  |
| H                                | -4.29922400 | 0.09318000  | 3.82084300  |
| C                                | -2.87921100 | 1.22459200  | 2.71362800  |
| H                                | -2.13749900 | 1.20532800  | 1.90466700  |
| C                                | -3.05447200 | 2.57912300  | 3.37722200  |
| H                                | -2.05102800 | 2.92537800  | 3.68421200  |
| N                                | -3.90080000 | 2.56529200  | 4.55622100  |
| H                                | -4.89583800 | 2.70586100  | 4.40287800  |
| C                                | -3.52744200 | 2.13607500  | 5.80963900  |
| C                                | -4.48803100 | 2.11180200  | 6.85411500  |
| C                                | -2.20551300 | 1.73072100  | 6.11848400  |
| C                                | -4.13583800 | 1.71445400  | 8.14315600  |
| H                                | -5.51577900 | 2.41515500  | 6.63274500  |

|               |             |             |             |
|---------------|-------------|-------------|-------------|
| C             | -1.86897100 | 1.34017000  | 7.41883300  |
| H             | -1.44103100 | 1.71381700  | 5.33959500  |
| C             | -2.82119100 | 1.32631600  | 8.44519400  |
| H             | -4.90140200 | 1.70890700  | 8.92464200  |
| H             | -0.83913200 | 1.03440000  | 7.62597500  |
| H             | -2.54866200 | 1.01578100  | 9.45661300  |
| C             | -3.60113400 | 3.60653200  | 2.37464500  |
| H             | -2.96591000 | 3.64730000  | 1.47702200  |
| H             | -4.62132500 | 3.33122800  | 2.05935600  |
| H             | -3.63069500 | 4.60859400  | 2.83008200  |
| <b>(S)-3a</b> |             |             |             |
| C             | -3.55210100 | 0.10975200  | -3.02045000 |
| H             | -3.37821800 | -0.82672700 | -2.48157000 |
| H             | -4.29922400 | 0.09318000  | -3.82084300 |
| C             | -2.87921100 | 1.22459200  | -2.71362800 |
| H             | -2.13749900 | 1.20532800  | -1.90466700 |
| C             | -3.05447200 | 2.57912300  | -3.37722200 |
| H             | -2.05102800 | 2.92537800  | -3.68421200 |
| N             | -3.90080000 | 2.56529200  | -4.55622100 |
| H             | -4.89583800 | 2.70586100  | -4.40287800 |
| C             | -3.52744200 | 2.13607500  | -5.80963900 |
| C             | -4.48803100 | 2.11180200  | -6.85411500 |
| C             | -2.20551300 | 1.73072100  | -6.11848400 |
| C             | -4.13583800 | 1.71445400  | -8.14315600 |
| H             | -5.51577900 | 2.41515500  | -6.63274500 |
| C             | -1.86897100 | 1.34017000  | -7.41883300 |
| H             | -1.44103100 | 1.71381700  | -5.33959500 |
| C             | -2.82119100 | 1.32631600  | -8.44519400 |
| H             | -4.90140200 | 1.70890700  | -8.92464200 |
| H             | -0.83913200 | 1.03440000  | -7.62597500 |
| H             | -2.54866200 | 1.01578100  | -9.45661300 |
| C             | -3.60113400 | 3.60653200  | -2.37464500 |
| H             | -2.96591000 | 3.64730000  | -1.47702200 |
| H             | -4.62132500 | 3.33122800  | -2.05935600 |
| H             | -3.63069500 | 4.60859400  | -2.83008200 |
| <b>E-4a</b>   |             |             |             |
| C             | 10.32832800 | 4.36236000  | 8.24006500  |
| C             | 10.29475300 | 4.12433200  | 6.76100800  |
| C             | 10.68554300 | 5.00116200  | 5.82316800  |
| H             | 11.08148500 | 5.98097300  | 6.12278300  |
| C             | 10.61327500 | 4.75046300  | 4.34281700  |
| H             | 9.92566700  | 5.48530300  | 3.88780400  |
| H             | 10.18642900 | 3.74649600  | 4.14618400  |
| H             | 9.90924100  | 3.14798700  | 6.43549600  |



|                                      |             |             |             |
|--------------------------------------|-------------|-------------|-------------|
| H                                    | 10.73407600 | 5.35590300  | 8.48608300  |
| N                                    | 11.92421100 | 4.92022800  | 3.73203200  |
| C                                    | 12.13808000 | 4.93290700  | 2.36883500  |
| C                                    | 11.08459700 | 5.04598000  | 1.42945300  |
| C                                    | 13.46456500 | 4.85781900  | 1.87106000  |
| C                                    | 11.36037300 | 5.10393600  | 0.05833900  |
| H                                    | 10.04814500 | 5.08828400  | 1.76884300  |
| C                                    | 13.72073000 | 4.91132600  | 0.50207300  |
| H                                    | 14.29062200 | 4.76077000  | 2.58201200  |
| C                                    | 12.67269400 | 5.03882200  | -0.42330200 |
| H                                    | 10.52556400 | 5.19411400  | -0.64300400 |
| H                                    | 14.75548200 | 4.85141100  | 0.15224600  |
| H                                    | 12.87712700 | 5.08053500  | -1.49577800 |
| H                                    | 12.70352800 | 4.57352000  | 4.28678300  |
| H                                    | 9.31579800  | 4.28347500  | 8.67435300  |
| H                                    | 10.94327000 | 3.59832400  | 8.74783900  |
| <b>IM1a</b> <sup>triplet</sup> -endo |             |             |             |
| C                                    | 12.76338300 | 7.77763800  | 23.46127900 |
| O                                    | 11.44817600 | 6.15940400  | 29.37972300 |
| N                                    | 10.92765700 | 5.56493000  | 27.27622400 |
| P                                    | 12.28341000 | 6.83942700  | 24.97213400 |
| N                                    | 11.00730100 | 4.16870400  | 24.28206800 |
| O                                    | 12.34067200 | 2.64381900  | 23.32304700 |
| C                                    | 13.85639000 | 7.41297500  | 22.65503900 |
| H                                    | 14.50258800 | 6.58239300  | 22.94544300 |
| C                                    | 14.12916900 | 8.11228000  | 21.47270000 |
| C                                    | 13.59011100 | 10.07040900 | 27.21549100 |
| H                                    | 14.11300800 | 11.00806600 | 27.01304800 |
| C                                    | 13.31536600 | 9.19014200  | 26.16282900 |
| H                                    | 13.63700500 | 9.45387400  | 25.15387600 |
| C                                    | 12.64614000 | 7.97555800  | 26.37800900 |
| C                                    | 11.94513400 | 8.85241000  | 23.05539600 |
| H                                    | 11.08732600 | 9.14969200  | 23.66313500 |
| C                                    | 12.22960800 | 9.55589200  | 21.88181400 |
| C                                    | 13.32101600 | 9.18569600  | 21.08492100 |
| C                                    | 13.20342800 | 9.74020800  | 28.51584600 |
| H                                    | 13.41517200 | 10.41604900 | 29.34721600 |
| C                                    | 12.54012100 | 8.53585200  | 28.75333800 |
| H                                    | 12.23457600 | 8.27474400  | 29.76663500 |
| C                                    | 11.52051200 | 6.40844200  | 28.06010900 |
| C                                    | 12.24318400 | 7.64550800  | 27.70205900 |
| C                                    | 10.73158500 | 4.91491700  | 29.55601000 |
| H                                    | 9.89430000  | 5.09460300  | 30.24264000 |
| H                                    | 11.42592300 | 4.18780200  | 30.00032900 |

|    |             |            |             |
|----|-------------|------------|-------------|
| C  | 10.27974500 | 4.53123600 | 28.12516600 |
| H  | 9.19136200  | 4.65680900 | 28.01963800 |
| C  | 13.63023000 | 5.57799200 | 25.13294100 |
| C  | 14.86489400 | 5.94501000 | 25.69309500 |
| H  | 15.01044800 | 6.96541700 | 26.05291600 |
| C  | 15.92182400 | 5.03422100 | 25.79151200 |
| H  | 16.86905300 | 5.35081400 | 26.23428000 |
| C  | 15.76391200 | 3.73024700 | 25.31490300 |
| H  | 16.58361900 | 3.01164000 | 25.38212800 |
| C  | 14.54666600 | 3.34387900 | 24.75430400 |
| H  | 14.41185800 | 2.32447700 | 24.39170000 |
| C  | 13.46885300 | 4.24780400 | 24.66760000 |
| C  | 12.21224200 | 3.72810600 | 24.09893800 |
| C  | 11.00654700 | 2.18188000 | 22.99292000 |
| H  | 10.83142100 | 1.24306700 | 23.53676000 |
| H  | 10.96850000 | 2.00297000 | 21.91149500 |
| C  | 10.08797400 | 3.33251400 | 23.47695100 |
| H  | 9.30358400  | 2.93301300 | 24.13408900 |
| C  | 9.28220900  | 7.61028500 | 25.34200500 |
| H  | 9.78715000  | 8.30257200 | 26.02268800 |
| H  | 9.14759800  | 7.97150600 | 24.31514100 |
| C  | 8.43428200  | 6.60981400 | 25.83309900 |
| H  | 8.31941700  | 6.49700600 | 26.91857500 |
| C  | 7.28209300  | 6.08959700 | 25.01509600 |
| O  | 6.17869000  | 7.05366900 | 25.21520500 |
| C  | 5.35312300  | 7.25546500 | 24.19006400 |
| O  | 5.41759100  | 6.74254900 | 23.09153400 |
| O  | 4.42469900  | 8.14001600 | 24.57424300 |
| C  | 3.44658800  | 8.48068000 | 23.57985800 |
| H  | 2.88779600  | 7.58776300 | 23.26309200 |
| H  | 2.77171100  | 9.19722400 | 24.06316800 |
| H  | 3.92692100  | 8.94351800 | 22.70519900 |
| H  | 7.52373800  | 6.11023700 | 23.94335500 |
| Co | 10.27871100 | 5.79358800 | 25.29153300 |
| C  | 10.63190300 | 3.10832300 | 27.73362600 |
| C  | 9.61341100  | 2.17082700 | 27.50152200 |
| C  | 11.97168600 | 2.69187600 | 27.64879000 |
| C  | 9.92459900  | 0.84110400 | 27.18935900 |
| H  | 8.56791400  | 2.48353000 | 27.57244000 |
| C  | 12.28429700 | 1.36615500 | 27.33254700 |
| H  | 12.77594900 | 3.40978600 | 27.83168900 |
| C  | 11.26113100 | 0.43598800 | 27.10310100 |
| H  | 9.12026800  | 0.12167200 | 27.01535100 |
| H  | 13.33039200 | 1.05609400 | 27.26763300 |

|                                   |             |             |             |
|-----------------------------------|-------------|-------------|-------------|
| H                                 | 11.50652400 | -0.60113100 | 26.86051500 |
| C                                 | 9.42515600  | 4.10952800  | 22.35046200 |
| C                                 | 8.17360700  | 3.68454200  | 21.87268600 |
| C                                 | 10.05203900 | 5.20487300  | 21.73489100 |
| C                                 | 7.56277600  | 4.33704700  | 20.79689100 |
| H                                 | 7.67421800  | 2.83601800  | 22.34880200 |
| C                                 | 9.43661000  | 5.86349100  | 20.66305900 |
| H                                 | 11.02262800 | 5.55150900  | 22.09778300 |
| C                                 | 8.19267200  | 5.43061500  | 20.18966100 |
| H                                 | 6.58820900  | 3.99637400  | 20.43797400 |
| H                                 | 9.93366900  | 6.71827400  | 20.19708600 |
| H                                 | 7.71352500  | 5.94585000  | 19.35328900 |
| C                                 | 6.77170700  | 4.71797300  | 25.42716100 |
| H                                 | 5.91044500  | 4.42149400  | 24.80946400 |
| H                                 | 7.56362600  | 3.96523600  | 25.29954700 |
| H                                 | 6.46390100  | 4.72294300  | 26.48487600 |
| H                                 | 14.98191400 | 7.81581500  | 20.85671400 |
| H                                 | 13.53842400 | 9.73247600  | 20.16399600 |
| H                                 | 11.59265900 | 10.39348000 | 21.58658200 |
| <b>IM1b<sup>triplet</sup>-exo</b> |             |             |             |
| Co                                | 9.57200300  | 5.22181400  | 4.06976200  |
| C                                 | 7.91003600  | 5.91863700  | 1.21280000  |
| O                                 | 6.47877800  | 7.86414800  | 5.42532600  |
| N                                 | 8.27858900  | 6.79645500  | 4.60671600  |
| P                                 | 7.93700600  | 4.66199700  | 2.57303800  |
| N                                 | 10.69694800 | 5.98855900  | 2.57217500  |
| O                                 | 11.45984400 | 6.70922200  | 0.59394000  |
| C                                 | 6.69699100  | 6.20682800  | 0.56608400  |
| H                                 | 5.78017900  | 5.71782200  | 0.90136700  |
| C                                 | 6.63496800  | 7.09861700  | -0.50905000 |
| H                                 | 5.67498300  | 7.30164800  | -0.98938300 |
| C                                 | 7.80199000  | 7.71443400  | -0.96895300 |
| H                                 | 7.76847200  | 8.40812800  | -1.81188500 |
| C                                 | 9.01761400  | 7.44470800  | -0.34143600 |
| H                                 | 9.92928100  | 7.93196700  | -0.68788500 |
| C                                 | 9.08953300  | 6.56357000  | 0.75673200  |
| C                                 | 10.41817900 | 6.38457500  | 1.37148800  |
| C                                 | 12.16974200 | 5.98913300  | 2.73643400  |
| H                                 | 12.42741000 | 6.69600100  | 3.53825700  |
| C                                 | 12.67175600 | 6.52590700  | 1.36999500  |
| H                                 | 13.17230600 | 7.49978000  | 1.45118600  |
| H                                 | 13.31283200 | 5.81922200  | 0.82681300  |
| C                                 | 3.94300700  | 4.06322100  | 3.52310400  |
| H                                 | 3.15438400  | 3.37561700  | 3.20886800  |

|   |             |             |             |
|---|-------------|-------------|-------------|
| C | 5.21444900  | 3.96663300  | 2.94640500  |
| H | 5.39280400  | 3.20560300  | 2.18513400  |
| C | 6.25815000  | 4.82779700  | 3.32064700  |
| C | 4.70822000  | 5.91457900  | 4.86633100  |
| H | 4.51581200  | 6.68207500  | 5.61605000  |
| C | 3.68962300  | 5.03954500  | 4.48845800  |
| H | 2.70202500  | 5.12505700  | 4.94681400  |
| C | 6.99213800  | 6.81162900  | 4.76031800  |
| C | 5.99584500  | 5.82485700  | 4.30094000  |
| C | 7.59604100  | 8.62149700  | 5.94944700  |
| H | 7.66473700  | 8.41919000  | 7.02852000  |
| H | 7.39595800  | 9.68632800  | 5.77970400  |
| C | 8.80968200  | 8.07062000  | 5.17004300  |
| H | 9.63078400  | 7.83862400  | 5.85811500  |
| C | 7.90586900  | 3.06365900  | 1.65893700  |
| C | 7.69673100  | 1.86937900  | 2.38037800  |
| H | 7.46194600  | 1.90550100  | 3.44662900  |
| C | 7.76591000  | 0.63035700  | 1.73791300  |
| C | 8.06191600  | 0.56030200  | 0.37050000  |
| C | 8.28231700  | 1.73826300  | -0.35042600 |
| C | 8.20258400  | 2.98323200  | 0.28591100  |
| H | 8.37225500  | 3.89163600  | -0.29559500 |
| C | 12.70026900 | 4.61859100  | 3.11836200  |
| C | 13.72400900 | 4.50695900  | 4.07235500  |
| C | 12.20436900 | 3.45257900  | 2.51034200  |
| C | 14.24400400 | 3.25308100  | 4.41501900  |
| H | 14.11272900 | 5.40919200  | 4.55307700  |
| C | 12.71835400 | 2.19846800  | 2.85789000  |
| H | 11.40749800 | 3.52312300  | 1.76523100  |
| C | 13.73998300 | 2.09532300  | 3.81071400  |
| H | 15.04029400 | 3.18076700  | 5.16034100  |
| H | 12.31938900 | 1.29881600  | 2.38222000  |
| H | 14.14076000 | 1.11529000  | 4.08182900  |
| C | 9.34381800  | 9.00181800  | 4.09410100  |
| C | 10.67458600 | 9.44453100  | 4.15170200  |
| C | 8.51506900  | 9.47374200  | 3.06093800  |
| C | 11.17407200 | 10.33594100 | 3.19385300  |
| H | 11.32340200 | 9.09277600  | 4.95871300  |
| C | 9.01090400  | 10.36730300 | 2.10618200  |
| H | 7.47354100  | 9.14583400  | 2.99939100  |
| C | 10.34254200 | 10.79919600 | 2.16837500  |
| H | 12.21273400 | 10.67132400 | 3.25301400  |
| H | 8.35519700  | 10.72830900 | 1.30979900  |
| H | 10.72814400 | 11.49749100 | 1.42114900  |

|                                    |             |             |             |
|------------------------------------|-------------|-------------|-------------|
| C                                  | 11.27641200 | 6.00807300  | 7.37837700  |
| C                                  | 10.00648400 | 5.21769600  | 7.10253300  |
| C                                  | 10.08595100 | 4.33598100  | 5.88533300  |
| H                                  | 11.07076100 | 3.88488600  | 5.69985800  |
| C                                  | 8.96668300  | 3.69224500  | 5.34238900  |
| H                                  | 7.96481700  | 3.86555100  | 5.75251700  |
| H                                  | 9.10070200  | 2.74477800  | 4.81173900  |
| O                                  | 9.77438900  | 4.32708900  | 8.25920800  |
| C                                  | 9.04859900  | 4.82304600  | 9.25989800  |
| O                                  | 8.54271300  | 5.92608100  | 9.31475800  |
| O                                  | 8.95921000  | 3.88741500  | 10.21208600 |
| C                                  | 8.19666600  | 4.25708900  | 11.37167900 |
| H                                  | 7.15765900  | 4.48890000  | 11.09501700 |
| H                                  | 8.22560500  | 3.38393900  | 12.03442800 |
| H                                  | 8.64769500  | 5.12721500  | 11.87105100 |
| H                                  | 11.51657200 | 6.65538300  | 6.52151100  |
| H                                  | 9.13138100  | 5.87922200  | 7.05289000  |
| H                                  | 8.51300900  | 1.69419900  | -1.41784000 |
| H                                  | 8.12010200  | -0.40941700 | -0.12996100 |
| H                                  | 7.58920600  | -0.28411800 | 2.30969900  |
| H                                  | 11.15816500 | 6.64042600  | 8.27086300  |
| H                                  | 12.12414900 | 5.32309300  | 7.53789900  |
| <b>TS1a<sup>triplet</sup>-endo</b> |             |             |             |
| C                                  | 12.86123300 | 7.78917800  | 23.52719900 |
| O                                  | 11.38474400 | 6.08735700  | 29.37196600 |
| N                                  | 10.94441800 | 5.56448200  | 27.23770100 |
| P                                  | 12.40192600 | 6.85018100  | 25.03440200 |
| N                                  | 11.04707500 | 4.26781800  | 24.24647200 |
| O                                  | 12.30263400 | 2.63972500  | 23.37269100 |
| C                                  | 13.80803000 | 7.28524200  | 22.61664900 |
| H                                  | 14.33901300 | 6.35524400  | 22.82833200 |
| C                                  | 14.08084100 | 7.97542100  | 21.42979400 |
| C                                  | 13.78836200 | 9.94703200  | 27.39342600 |
| H                                  | 14.36496100 | 10.86058200 | 27.23233100 |
| C                                  | 13.49695800 | 9.11416700  | 26.30665700 |
| H                                  | 13.85953600 | 9.38981300  | 25.31516700 |
| C                                  | 12.75810000 | 7.93411200  | 26.47386900 |
| C                                  | 12.19103400 | 8.99321300  | 23.22701500 |
| H                                  | 11.45874900 | 9.40904400  | 23.92142800 |
| C                                  | 12.47580200 | 9.68082200  | 22.04459300 |
| C                                  | 13.41786100 | 9.17243200  | 21.14137000 |
| C                                  | 13.34852400 | 9.60211900  | 28.67213500 |
| H                                  | 13.57202100 | 10.24292500 | 29.52759600 |
| C                                  | 12.61843600 | 8.42724200  | 28.85926200 |

|    |             |            |             |
|----|-------------|------------|-------------|
| H  | 12.27389500 | 8.15386800 | 29.85659900 |
| C  | 11.52536200 | 6.36841800 | 28.07154600 |
| C  | 12.30792200 | 7.58428400 | 27.77567700 |
| C  | 10.57708800 | 4.88888300 | 29.48637300 |
| H  | 9.69216000  | 5.13244500 | 30.08836600 |
| H  | 11.18006700 | 4.12807400 | 29.99991100 |
| C  | 10.23585500 | 4.51862700 | 28.02000300 |
| H  | 9.15860200  | 4.64105400 | 27.83399400 |
| C  | 13.69238500 | 5.53675600 | 25.16821300 |
| C  | 14.93998600 | 5.87549400 | 25.71491000 |
| H  | 15.11255000 | 6.88806600 | 26.08363800 |
| C  | 15.97710400 | 4.93965200 | 25.78957400 |
| H  | 16.93622200 | 5.23140500 | 26.22314000 |
| C  | 15.78387500 | 3.64426600 | 25.30442800 |
| H  | 16.58831900 | 2.90752900 | 25.35494000 |
| C  | 14.55225100 | 3.28929500 | 24.75399500 |
| H  | 14.39183100 | 2.27767900 | 24.38068200 |
| C  | 13.49605500 | 4.21812000 | 24.68745500 |
| C  | 12.22676800 | 3.74685300 | 24.10951600 |
| C  | 10.95777300 | 2.28671100 | 22.94960300 |
| H  | 10.70063200 | 1.33003400 | 23.42272500 |
| H  | 10.97043500 | 2.17747600 | 21.85805700 |
| C  | 10.08234800 | 3.46303600 | 23.45334700 |
| H  | 9.30345500  | 3.08733400 | 24.13097000 |
| C  | 9.58267800  | 7.75431800 | 25.15374100 |
| H  | 10.07930900 | 8.57699500 | 25.67458000 |
| H  | 9.44969300  | 7.88954700 | 24.07283100 |
| C  | 8.61082300  | 6.98295900 | 25.85585000 |
| H  | 8.51012600  | 7.09325400 | 26.94065500 |
| C  | 7.82027100  | 6.04783500 | 25.19290500 |
| O  | 6.08283800  | 7.55494100 | 24.28852100 |
| C  | 4.95798200  | 7.09966500 | 23.96863500 |
| O  | 4.52489300  | 5.93033600 | 24.00585700 |
| O  | 4.08772500  | 8.09691100 | 23.50802400 |
| C  | 2.79111700  | 7.66330000 | 23.13351700 |
| H  | 2.25399200  | 7.19281500 | 23.97510800 |
| H  | 2.24228600  | 8.56102300 | 22.80969500 |
| H  | 2.82209100  | 6.93747000 | 22.30246800 |
| H  | 7.93318200  | 5.96312400 | 24.10957000 |
| Co | 10.37568300 | 5.88428100 | 25.23939300 |
| C  | 10.62672700 | 3.10225700 | 27.63944400 |
| C  | 9.63059900  | 2.14638400 | 27.38512000 |
| C  | 11.97515800 | 2.70955700 | 27.59173400 |
| C  | 9.97317800  | 0.82128600 | 27.08700500 |

|                                             |             |             |             |
|---------------------------------------------|-------------|-------------|-------------|
| H                                           | 8.57829200  | 2.44002100  | 27.42854100 |
| C                                           | 12.31863600 | 1.38791700  | 27.28986900 |
| H                                           | 12.76238100 | 3.44155100  | 27.79129700 |
| C                                           | 11.31834900 | 0.43936500  | 27.03742400 |
| H                                           | 9.18626000  | 0.08747700  | 26.89475500 |
| H                                           | 13.37123400 | 1.09596100  | 27.25400600 |
| H                                           | 11.58804500 | -0.59400800 | 26.80503900 |
| C                                           | 9.41313900  | 4.27417500  | 22.35615000 |
| C                                           | 8.04642000  | 4.08601500  | 22.09418300 |
| C                                           | 10.13604400 | 5.19385400  | 21.57748800 |
| C                                           | 7.40944500  | 4.80787800  | 21.07864000 |
| H                                           | 7.47338900  | 3.37791300  | 22.69895700 |
| C                                           | 9.49890500  | 5.91810000  | 20.56365500 |
| H                                           | 11.20085200 | 5.35331300  | 21.76567300 |
| C                                           | 8.13416300  | 5.72833200  | 20.31251500 |
| H                                           | 6.34179900  | 4.66022600  | 20.89761300 |
| H                                           | 10.07117100 | 6.63559100  | 19.96998200 |
| H                                           | 7.63680100  | 6.29910100  | 19.52428400 |
| C                                           | 6.91270500  | 5.07869400  | 25.85219000 |
| H                                           | 5.93142700  | 5.13371000  | 25.33998800 |
| H                                           | 7.28990700  | 4.05005100  | 25.71257000 |
| H                                           | 6.80120800  | 5.27502600  | 26.92845000 |
| H                                           | 14.81920200 | 7.57324200  | 20.73197900 |
| H                                           | 13.63515800 | 9.71075500  | 20.21561900 |
| H                                           | 11.95668600 | 10.61775300 | 21.82880800 |
| <b>TS1b</b> <sup>triplet</sup> - <i>exo</i> |             |             |             |
| Co                                          | 9.47249800  | 5.34397700  | 4.05132600  |
| C                                           | 7.89296900  | 5.95621800  | 1.15318500  |
| O                                           | 6.34893700  | 7.99817000  | 5.21528800  |
| N                                           | 8.16498000  | 6.93127100  | 4.44994500  |
| P                                           | 7.89255600  | 4.72585100  | 2.53218600  |
| N                                           | 10.64094000 | 6.00102900  | 2.53106400  |
| O                                           | 11.44626700 | 6.75573700  | 0.58904800  |
| C                                           | 6.68645300  | 6.21639600  | 0.48495600  |
| H                                           | 5.76705500  | 5.73313700  | 0.82025800  |
| C                                           | 6.63642900  | 7.07898400  | -0.61520600 |
| H                                           | 5.68158900  | 7.26400200  | -1.11236800 |
| C                                           | 7.80521400  | 7.68874400  | -1.07645900 |
| H                                           | 7.77854500  | 8.35867100  | -1.93839800 |
| C                                           | 9.01484600  | 7.44276200  | -0.42697100 |
| H                                           | 9.92926500  | 7.92353400  | -0.77515700 |
| C                                           | 9.07434000  | 6.59212900  | 0.69361200  |
| C                                           | 10.39072400 | 6.41928700  | 1.33089200  |
| C                                           | 12.11050500 | 5.98374200  | 2.73131800  |

|   |             |             |             |
|---|-------------|-------------|-------------|
| H | 12.35469200 | 6.66938800  | 3.55513200  |
| C | 12.64303300 | 6.55044500  | 1.38878500  |
| H | 13.14183900 | 7.52167600  | 1.50105200  |
| H | 13.29169300 | 5.85471100  | 0.84121100  |
| C | 3.90101900  | 4.08388200  | 3.42197800  |
| H | 3.13076500  | 3.37097600  | 3.11958400  |
| C | 5.18698800  | 3.98181300  | 2.87812800  |
| H | 5.39431000  | 3.19357400  | 2.15317900  |
| C | 6.20315900  | 4.87758100  | 3.24200100  |
| C | 4.60333400  | 6.00567600  | 4.70145700  |
| H | 4.37973900  | 6.80204600  | 5.41132100  |
| C | 3.60973800  | 5.09545700  | 4.33839900  |
| H | 2.61029500  | 5.18273900  | 4.76952500  |
| C | 6.87660100  | 6.93527400  | 4.59534800  |
| C | 5.90267300  | 5.91275700  | 4.16860000  |
| C | 7.44642200  | 8.82405600  | 5.68155400  |
| H | 7.48272900  | 8.74494000  | 6.77708000  |
| H | 7.23811500  | 9.85996700  | 5.38756500  |
| C | 8.69232000  | 8.21201900  | 4.99902600  |
| H | 9.45711600  | 7.97581900  | 5.74894300  |
| C | 7.96811200  | 3.10533800  | 1.67398300  |
| C | 7.69098600  | 1.91818900  | 2.38348700  |
| H | 7.34077100  | 1.95828700  | 3.41684400  |
| C | 7.83866500  | 0.67484700  | 1.76302600  |
| C | 8.27658700  | 0.59526800  | 0.43521000  |
| C | 8.55924900  | 1.76780800  | -0.27262800 |
| C | 8.40466400  | 3.01734200  | 0.33888600  |
| H | 8.62523700  | 3.92126400  | -0.23210900 |
| C | 12.62437200 | 4.60013800  | 3.08904900  |
| C | 13.60880000 | 4.45750600  | 4.07974000  |
| C | 12.15411700 | 3.45500400  | 2.42377300  |
| C | 14.11557700 | 3.19288200  | 4.40188900  |
| H | 13.97768600 | 5.34378900  | 4.60381100  |
| C | 12.65495500 | 2.19016100  | 2.75057600  |
| H | 11.38828000 | 3.54922900  | 1.64935600  |
| C | 13.63745800 | 2.05592500  | 3.73988100  |
| H | 14.88118900 | 3.09588400  | 5.17588300  |
| H | 12.27637600 | 1.30676200  | 2.22997000  |
| H | 14.02798700 | 1.06746200  | 3.99472400  |
| C | 9.32927000  | 9.09252700  | 3.93727700  |
| C | 10.66424100 | 9.50196100  | 4.08222900  |
| C | 8.59293100  | 9.55368300  | 2.83214100  |
| C | 11.25662300 | 10.35366000 | 3.14120400  |
| H | 11.24256300 | 9.15645700  | 4.94366200  |



|                                    |             |             |             |
|------------------------------------|-------------|-------------|-------------|
| C                                  | 9.18195500  | 10.40737300 | 1.89393800  |
| H                                  | 7.55063800  | 9.25002200  | 2.70006600  |
| C                                  | 10.51602400 | 10.80850500 | 2.04483600  |
| H                                  | 12.29657900 | 10.66489900 | 3.26918400  |
| H                                  | 8.59731600  | 10.76076100 | 1.04091500  |
| H                                  | 10.97434600 | 11.47626000 | 1.31092500  |
| C                                  | 10.96624200 | 6.04694500  | 7.46671400  |
| C                                  | 9.81801600  | 5.38029000  | 6.80843000  |
| C                                  | 9.95062300  | 4.32008000  | 5.90898300  |
| H                                  | 10.94776600 | 3.88528100  | 5.77278800  |
| C                                  | 8.86219000  | 3.74879500  | 5.19092100  |
| H                                  | 7.83757200  | 3.93431800  | 5.53088500  |
| H                                  | 9.03118100  | 2.78727200  | 4.69894400  |
| O                                  | 8.91621700  | 4.16153900  | 8.63065300  |
| C                                  | 9.17635400  | 4.44546500  | 9.82923400  |
| O                                  | 9.92189800  | 5.32712500  | 10.29698700 |
| O                                  | 8.50293500  | 3.61610000  | 10.72704700 |
| C                                  | 8.74219400  | 3.86688100  | 12.10313400 |
| H                                  | 8.43884700  | 4.88704400  | 12.39428000 |
| H                                  | 8.13935200  | 3.13526300  | 12.66205300 |
| H                                  | 9.80621400  | 3.73851400  | 12.36557800 |
| H                                  | 10.98977300 | 7.12238700  | 7.21978500  |
| H                                  | 8.82967200  | 5.82322300  | 6.94255600  |
| H                                  | 8.89794100  | 1.71625200  | -1.31018900 |
| H                                  | 8.39433200  | -0.37867500 | -0.04597900 |
| H                                  | 7.60931200  | -0.23544000 | 2.32225800  |
| H                                  | 10.81035900 | 5.97319100  | 8.56398100  |
| H                                  | 11.92698700 | 5.58812000  | 7.19103800  |
| <b>IM2a<sup>triplet</sup>-endo</b> |             |             |             |
| C                                  | 11.77465400 | 7.12959600  | 28.48236300 |
| O                                  | 8.53463700  | 1.87900100  | 27.59327400 |
| N                                  | 9.33982700  | 3.60168500  | 26.42751600 |
| P                                  | 11.07162500 | 5.57963900  | 27.80839600 |
| N                                  | 11.54581700 | 5.50700700  | 24.81672000 |
| O                                  | 13.57462000 | 4.94740000  | 24.07076600 |
| C                                  | 13.15226700 | 7.40227600  | 28.40534300 |
| H                                  | 13.84325500 | 6.65848800  | 28.00363000 |
| C                                  | 13.65004900 | 8.63287300  | 28.84960200 |
| C                                  | 9.54194100  | 4.67715100  | 31.54782300 |
| H                                  | 9.66093300  | 5.06421200  | 32.56219200 |
| C                                  | 10.26015600 | 5.26230700  | 30.49821700 |
| H                                  | 10.93504400 | 6.09104700  | 30.71576600 |
| C                                  | 10.13259400 | 4.79622000  | 29.18158500 |
| C                                  | 10.90513900 | 8.10894900  | 29.00608200 |

|    |             |            |             |
|----|-------------|------------|-------------|
| H  | 9.83193400  | 7.91386300 | 29.07342700 |
| C  | 11.41151400 | 9.33057500 | 29.45676100 |
| C  | 12.78430600 | 9.59679700 | 29.37642300 |
| C  | 8.68745400  | 3.60301900 | 31.29573400 |
| H  | 8.12259900  | 3.14047800 | 32.10758000 |
| C  | 8.55918600  | 3.11307200 | 29.99524700 |
| H  | 7.89872900  | 2.26963200 | 29.79381500 |
| C  | 9.07342500  | 3.09646300 | 27.59515800 |
| C  | 9.26594400  | 3.69842600 | 28.92814200 |
| C  | 8.29509000  | 1.48920400 | 26.21479500 |
| H  | 7.20797600  | 1.44690100 | 26.06551900 |
| H  | 8.73172500  | 0.49378000 | 26.06964200 |
| C  | 8.97565200  | 2.59985700 | 25.38027200 |
| H  | 8.24973400  | 3.06924400 | 24.70251000 |
| C  | 12.52084500 | 4.47198300 | 27.57288200 |
| C  | 13.04484600 | 3.80299100 | 28.68956300 |
| H  | 12.56615500 | 3.91956300 | 29.66363700 |
| C  | 14.17935600 | 2.99225000 | 28.58137400 |
| H  | 14.56432500 | 2.48141000 | 29.46667100 |
| C  | 14.81518500 | 2.84764200 | 27.34639500 |
| H  | 15.70412600 | 2.22083900 | 27.25087800 |
| C  | 14.30926400 | 3.50598600 | 26.22557300 |
| H  | 14.79921300 | 3.38836600 | 25.25929200 |
| C  | 13.15919700 | 4.31464400 | 26.31684700 |
| C  | 12.69563000 | 4.95542700 | 25.07199600 |
| C  | 12.91196600 | 5.46421800 | 22.88665500 |
| H  | 12.74989800 | 4.62038100 | 22.20250000 |
| H  | 13.57737100 | 6.20376200 | 22.42617600 |
| C  | 11.59280900 | 6.05838400 | 23.43324400 |
| H  | 10.73523500 | 5.67002000 | 22.86776800 |
| C  | 9.26702100  | 7.47578000 | 25.97014500 |
| H  | 9.83094700  | 8.16540400 | 26.59983100 |
| H  | 9.35459800  | 7.62802800 | 24.88624000 |
| C  | 8.13577700  | 6.78951200 | 26.46692600 |
| H  | 7.88547200  | 6.84080200 | 27.53206600 |
| C  | 7.50795300  | 5.84543600 | 25.66009400 |
| H  | 7.70450600  | 5.88861200 | 24.57824600 |
| Co | 9.77564100  | 5.48397800 | 25.83799000 |
| C  | 10.15682900 | 2.13195000 | 24.54828500 |
| C  | 10.14404500 | 2.33089100 | 23.15859700 |
| C  | 11.23705800 | 1.44442600 | 25.12873100 |
| C  | 11.19088900 | 1.85363200 | 22.35998900 |
| H  | 9.30127500  | 2.85380400 | 22.69767800 |
| C  | 12.28257400 | 0.96745600 | 24.33188800 |

|                                   |             |             |             |
|-----------------------------------|-------------|-------------|-------------|
| H                                 | 11.26399500 | 1.27079600  | 26.20820900 |
| C                                 | 12.26255900 | 1.17070900  | 22.94570600 |
| H                                 | 11.16488100 | 2.01136100  | 21.27885600 |
| H                                 | 13.11531200 | 0.43258200  | 24.79510500 |
| H                                 | 13.07880100 | 0.79318800  | 22.32470200 |
| C                                 | 11.54960400 | 7.57762800  | 23.41417700 |
| C                                 | 10.72676500 | 8.23902200  | 22.48909200 |
| C                                 | 12.35590200 | 8.33898600  | 24.27741200 |
| C                                 | 10.70762500 | 9.63767800  | 22.42660600 |
| H                                 | 10.09549700 | 7.65358400  | 21.81447000 |
| C                                 | 12.33369200 | 9.73609400  | 24.21828600 |
| H                                 | 13.00220600 | 7.84428600  | 25.00747400 |
| C                                 | 11.50972200 | 10.38930500 | 23.29264800 |
| H                                 | 10.06137400 | 10.13959900 | 21.70204100 |
| H                                 | 12.96169300 | 10.31667500 | 24.89884000 |
| H                                 | 11.49272100 | 11.48116600 | 23.24811000 |
| C                                 | 6.38640200  | 4.97666000  | 26.11359900 |
| H                                 | 5.44223400  | 5.41120900  | 25.73552100 |
| H                                 | 6.44846400  | 3.96387600  | 25.68910000 |
| H                                 | 6.32362900  | 4.91642500  | 27.20889300 |
| H                                 | 14.72237400 | 8.83280700  | 28.78651600 |
| H                                 | 13.17749000 | 10.55453600 | 29.72569000 |
| H                                 | 10.72915300 | 10.07739800 | 29.86956500 |
| <b>IM2b<sup>triplet</sup>-exo</b> |             |             |             |
| Co                                | 9.37581500  | 6.26002100  | 4.68177500  |
| C                                 | 6.94333800  | 7.62996800  | 2.81121900  |
| O                                 | 8.93174300  | 10.13862000 | 6.28332700  |
| N                                 | 9.38472000  | 8.21481500  | 5.24603600  |
| P                                 | 7.05829900  | 6.54483100  | 4.29662500  |
| N                                 | 9.64835000  | 6.04612900  | 2.71079200  |
| O                                 | 9.69803900  | 6.64840600  | 0.56526000  |
| C                                 | 5.84809800  | 8.50063500  | 2.70157200  |
| H                                 | 5.09265700  | 8.51756300  | 3.48948300  |
| C                                 | 5.69813600  | 9.34820800  | 1.59926500  |
| H                                 | 4.83506100  | 10.01528700 | 1.54425000  |
| C                                 | 6.65149100  | 9.33523500  | 0.57951600  |
| H                                 | 6.54865800  | 9.99375200  | -0.28530000 |
| C                                 | 7.74581400  | 8.47534900  | 0.66746500  |
| H                                 | 8.49187700  | 8.46624800  | -0.12662200 |
| C                                 | 7.91275700  | 7.61857100  | 1.77509800  |
| C                                 | 9.09983400  | 6.74274200  | 1.74922200  |
| C                                 | 10.73239700 | 5.22188500  | 2.10860200  |
| H                                 | 11.63396100 | 5.29610800  | 2.72955500  |
| C                                 | 10.94570600 | 5.92726600  | 0.75629600  |

|   |             |             |             |
|---|-------------|-------------|-------------|
| H | 11.75409300 | 6.67152000  | 0.78483000  |
| H | 11.07593500 | 5.24916400  | -0.09389000 |
| C | 4.43893800  | 8.21323500  | 7.02385100  |
| H | 3.41209900  | 8.02826200  | 7.34693700  |
| C | 5.01374100  | 7.39457800  | 6.04519800  |
| H | 4.42204300  | 6.58773000  | 5.60950200  |
| C | 6.32865000  | 7.60276500  | 5.60513700  |
| C | 6.48454400  | 9.48924000  | 7.14520700  |
| H | 7.06289000  | 10.30470700 | 7.57892600  |
| C | 5.17447800  | 9.26656300  | 7.56997700  |
| H | 4.73430400  | 9.91585900  | 8.32948100  |
| C | 8.49732400  | 8.95908200  | 5.84725700  |
| C | 7.08634300  | 8.66283600  | 6.17483800  |
| C | 10.33052100 | 10.28225800 | 5.92287400  |
| H | 10.89239400 | 10.50857100 | 6.83728300  |
| H | 10.40452200 | 11.12251200 | 5.21970600  |
| C | 10.69943000 | 8.91936700  | 5.29521300  |
| H | 11.34593700 | 8.34513000  | 5.97575800  |
| C | 5.88203400  | 5.17587800  | 3.98835300  |
| C | 5.72534500  | 4.18360400  | 4.97788400  |
| H | 6.25048500  | 4.26542000  | 5.93214900  |
| C | 4.88231700  | 3.09233800  | 4.75231500  |
| C | 4.20179400  | 2.96754100  | 3.53446100  |
| C | 4.36366500  | 3.94189800  | 2.54406600  |
| C | 5.19811500  | 5.04341100  | 2.76645600  |
| H | 5.31137200  | 5.79618100  | 1.98430000  |
| C | 10.34126800 | 3.75813900  | 1.95736800  |
| C | 11.34733800 | 2.77900700  | 2.01932500  |
| C | 9.02100400  | 3.36114000  | 1.69226300  |
| C | 11.04021900 | 1.42915300  | 1.81929000  |
| H | 12.37856500 | 3.07738200  | 2.22819100  |
| C | 8.71328100  | 2.00957500  | 1.49580000  |
| H | 8.21861700  | 4.10140800  | 1.64885200  |
| C | 9.72065200  | 1.04007700  | 1.55830400  |
| H | 11.83328700 | 0.67894400  | 1.87308800  |
| H | 7.67981500  | 1.71533700  | 1.29570500  |
| H | 9.47828800  | -0.01480400 | 1.40700500  |
| C | 11.39384800 | 9.02659200  | 3.95109900  |
| C | 12.68971300 | 8.51222300  | 3.78992500  |
| C | 10.78452300 | 9.69360000  | 2.87384800  |
| C | 13.36967100 | 8.66485500  | 2.57493400  |
| H | 13.17206200 | 7.99683000  | 4.62528900  |
| C | 11.46047300 | 9.84238900  | 1.65930300  |
| H | 9.77841900  | 10.10685400 | 2.98756000  |

|                                |             |             |             |
|--------------------------------|-------------|-------------|-------------|
| C                              | 12.75680000 | 9.33105800  | 1.50794000  |
| H                              | 14.38100300 | 8.26552800  | 2.46460500  |
| H                              | 10.97674500 | 10.36350600 | 0.82932400  |
| H                              | 13.28710000 | 9.45426200  | 0.56031200  |
| C                              | 9.28936900  | 6.53857900  | 8.11780100  |
| C                              | 9.01352200  | 5.63763600  | 6.96724800  |
| C                              | 10.02080300 | 4.95361700  | 6.27337900  |
| H                              | 11.06792800 | 5.17032600  | 6.51607100  |
| C                              | 9.72987600  | 4.19513300  | 5.12962700  |
| H                              | 8.72187500  | 3.80191800  | 4.96319700  |
| H                              | 10.54572700 | 3.72038600  | 4.58174100  |
| H                              | 8.56953800  | 7.36740800  | 8.17787000  |
| H                              | 7.97845600  | 5.30928800  | 6.82863600  |
| H                              | 3.83625900  | 3.85072900  | 1.59151800  |
| H                              | 3.54734000  | 2.11042200  | 3.35857600  |
| H                              | 4.76126500  | 2.33490200  | 5.53041300  |
| H                              | 9.15234600  | 5.94705300  | 9.04362300  |
| H                              | 10.31646400 | 6.92919500  | 8.10975100  |
| <b>IM3a<sup>CSS</sup>-endo</b> |             |             |             |
| Co                             | 9.42602400  | 5.66759900  | 5.06729900  |
| C                              | 7.46933000  | 7.57257000  | 3.15957700  |
| O                              | 10.17997000 | 9.61750700  | 6.26221400  |
| N                              | 10.01756600 | 7.59746700  | 5.29984400  |
| P                              | 7.43224400  | 6.52604800  | 4.67348500  |
| N                              | 9.56894500  | 5.37355800  | 3.07631500  |
| O                              | 9.72610900  | 5.79072200  | 0.87950400  |
| C                              | 6.60122900  | 8.67127000  | 3.07088000  |
| H                              | 5.94468100  | 8.91714200  | 3.90701200  |
| C                              | 6.55884400  | 9.45941600  | 1.91620300  |
| H                              | 5.87574000  | 10.31043300 | 1.87002100  |
| C                              | 7.38225100  | 9.15278700  | 0.82945500  |
| H                              | 7.35204000  | 9.76214500  | -0.07619000 |
| C                              | 8.24993700  | 8.06325300  | 0.90319600  |
| H                              | 8.89737300  | 7.81857100  | 0.06155300  |
| C                              | 8.30756400  | 7.27028200  | 2.06449100  |
| C                              | 9.21835800  | 6.11887000  | 2.07268600  |
| C                              | 10.37286900 | 4.23841400  | 2.51706600  |
| H                              | 11.26420400 | 4.12322800  | 3.14005300  |
| C                              | 10.72942300 | 4.76772800  | 1.11832800  |
| H                              | 11.71453300 | 5.25537600  | 1.08582300  |
| H                              | 10.64935000 | 4.02150500  | 0.31959200  |
| C                              | 5.40773700  | 8.90711500  | 7.38884500  |
| H                              | 4.38510500  | 9.00532200  | 7.75954500  |
| C                              | 5.70832800  | 7.91176800  | 6.45082000  |

|   |             |             |             |
|---|-------------|-------------|-------------|
| H | 4.90820900  | 7.26473900  | 6.09067900  |
| C | 7.01207400  | 7.75715300  | 5.96057600  |
| C | 7.70815000  | 9.64260000  | 7.34072600  |
| H | 8.49234200  | 10.31731100 | 7.68355400  |
| C | 6.40854600  | 9.77259100  | 7.83371100  |
| H | 6.18131600  | 10.55351900 | 8.56226700  |
| C | 9.42524800  | 8.55899200  | 5.94529700  |
| C | 8.02841600  | 8.63828800  | 6.40957400  |
| C | 11.55451700 | 9.26563200  | 5.96285200  |
| H | 12.05185000 | 9.03188600  | 6.91576300  |
| H | 12.03252000 | 10.13191600 | 5.49128900  |
| C | 11.42829000 | 8.03252000  | 5.04692200  |
| H | 12.08888100 | 7.23520900  | 5.39514800  |
| C | 5.97633000  | 5.43778500  | 4.41779500  |
| C | 5.31344100  | 4.80971300  | 5.49214700  |
| H | 5.60413600  | 5.00919000  | 6.52486600  |
| C | 4.24853100  | 3.93667300  | 5.25207200  |
| C | 3.83477200  | 3.67028900  | 3.94209400  |
| C | 4.48689400  | 4.28828200  | 2.87036500  |
| C | 5.55021200  | 5.16648100  | 3.10318800  |
| H | 6.04051400  | 5.64306000  | 2.25304600  |
| C | 9.61104600  | 2.92350900  | 2.48027700  |
| C | 10.24424700 | 1.75420300  | 2.93174700  |
| C | 8.31752000  | 2.82773600  | 1.94001700  |
| C | 9.59772600  | 0.51515000  | 2.85263900  |
| H | 11.25101200 | 1.81856300  | 3.35366100  |
| C | 7.66769800  | 1.59107600  | 1.86420000  |
| H | 7.80645700  | 3.72254200  | 1.57576600  |
| C | 8.30566900  | 0.43067100  | 2.32117500  |
| H | 10.10378600 | -0.38499400 | 3.21128800  |
| H | 6.65916000  | 1.53361900  | 1.44659800  |
| H | 7.79716100  | -0.53506200 | 2.26223000  |
| C | 11.72610700 | 8.32667800  | 3.58675000  |
| C | 12.75150800 | 7.62714900  | 2.93092200  |
| C | 11.05699400 | 9.35390100  | 2.89817500  |
| C | 13.10441600 | 7.94738700  | 1.61390100  |
| H | 13.28524800 | 6.83281500  | 3.45916500  |
| C | 11.40943700 | 9.67556300  | 1.58369200  |
| H | 10.25855200 | 9.91620200  | 3.39090200  |
| C | 12.43411300 | 8.97246200  | 0.93708100  |
| H | 13.90815500 | 7.39645800  | 1.11872700  |
| H | 10.88274300 | 10.47899600 | 1.06263700  |
| H | 12.71100800 | 9.22636600  | -0.08933100 |
| O | 11.30966500 | 5.04490000  | 5.02774500  |

|                                         |             |             |             |
|-----------------------------------------|-------------|-------------|-------------|
| C                                       | 12.41404700 | 4.77358300  | 5.61425100  |
| O                                       | 13.29009000 | 4.01975400  | 5.19888500  |
| O                                       | 12.58769300 | 5.45246200  | 6.80392500  |
| C                                       | 13.80852700 | 5.19270100  | 7.50105200  |
| H                                       | 14.67835400 | 5.49428600  | 6.89765000  |
| H                                       | 13.76616900 | 5.79223600  | 8.42019300  |
| H                                       | 13.90010700 | 4.12531500  | 7.75374300  |
| H                                       | 3.74071800  | 3.46586000  | 6.09697200  |
| H                                       | 3.00304400  | 2.98605700  | 3.75809400  |
| H                                       | 4.16845500  | 4.09189200  | 1.84391300  |
| C                                       | 9.51079600  | 5.33385200  | 7.25900000  |
| C                                       | 8.56106800  | 4.55149900  | 6.59956100  |
| H                                       | 7.50871300  | 4.73677300  | 6.83698100  |
| C                                       | 8.88523100  | 3.75308300  | 5.47246700  |
| H                                       | 8.06273000  | 3.28785900  | 4.92231900  |
| H                                       | 9.84168500  | 3.22721900  | 5.43412100  |
| H                                       | 10.56158500 | 5.04549800  | 7.21832800  |
| C                                       | 9.16032300  | 6.26519100  | 8.37712500  |
| H                                       | 9.40308100  | 5.76435200  | 9.33276400  |
| H                                       | 9.76712100  | 7.18385900  | 8.35220400  |
| H                                       | 8.09465100  | 6.53258700  | 8.39458900  |
| <b>IM3b</b> <sup>CSS</sup> - <i>exo</i> |             |             |             |
| Co                                      | 9.50508000  | 6.09845400  | 4.81787600  |
| C                                       | 7.22154700  | 7.55106600  | 2.84294000  |
| O                                       | 9.13799000  | 10.06960900 | 6.21431600  |
| N                                       | 9.51932200  | 8.14529100  | 5.12195300  |
| P                                       | 7.35383200  | 6.47256400  | 4.32820600  |
| N                                       | 9.81942100  | 5.95342900  | 2.84443900  |
| O                                       | 10.00527300 | 6.51069600  | 0.68331700  |
| C                                       | 6.10539400  | 8.39191600  | 2.71351600  |
| H                                       | 5.35173400  | 8.42187000  | 3.50233100  |
| C                                       | 5.93461400  | 9.19055400  | 1.57793100  |
| H                                       | 5.05660500  | 9.83553800  | 1.50025400  |
| C                                       | 6.88165100  | 9.15682800  | 0.55123600  |
| H                                       | 6.75491000  | 9.77663500  | -0.33883500 |
| C                                       | 7.99804300  | 8.32875000  | 0.66595400  |
| H                                       | 8.74375600  | 8.30038000  | -0.12815000 |
| C                                       | 8.18192000  | 7.52503000  | 1.80713800  |
| C                                       | 9.35635500  | 6.64498600  | 1.84597100  |
| C                                       | 10.86784300 | 5.04691300  | 2.28338300  |
| H                                       | 11.72673100 | 5.01442100  | 2.95742900  |
| C                                       | 11.21704100 | 5.76398500  | 0.97135500  |
| H                                       | 12.03588200 | 6.48897300  | 1.08852200  |
| H                                       | 11.41475800 | 5.09570700  | 0.12619700  |

|   |             |             |            |
|---|-------------|-------------|------------|
| C | 4.63689100  | 8.14491400  | 6.97246400 |
| H | 3.60164000  | 7.96626600  | 7.27136800 |
| C | 5.23189500  | 7.31152800  | 6.01706500 |
| H | 4.64616700  | 6.50290500  | 5.57848700 |
| C | 6.55843700  | 7.51520600  | 5.61431700 |
| C | 6.68218000  | 9.41981100  | 7.13261400 |
| H | 7.25359100  | 10.24207500 | 7.56309100 |
| C | 5.36250800  | 9.19871900  | 7.53092100 |
| H | 4.90448800  | 9.85223500  | 8.27624800 |
| C | 8.68461800  | 8.88154200  | 5.79565300 |
| C | 7.29421800  | 8.58582500  | 6.17914800 |
| C | 10.57005800 | 10.07665500 | 5.97698200 |
| H | 11.06433600 | 9.86066600  | 6.93599500 |
| H | 10.85201200 | 11.07541900 | 5.62489300 |
| C | 10.76963200 | 8.95783700  | 4.94347700 |
| H | 11.61490800 | 8.31727600  | 5.20703400 |
| C | 6.17486000  | 5.10455500  | 4.00149800 |
| C | 5.80157000  | 4.23296700  | 5.04617800 |
| H | 6.17351800  | 4.38924600  | 6.06120700 |
| C | 4.93810500  | 3.16334200  | 4.79487400 |
| C | 4.44594200  | 2.94296000  | 3.50269700 |
| C | 4.81763500  | 3.79911600  | 2.46135000 |
| C | 5.67798700  | 4.87571700  | 2.70570300 |
| H | 5.95254700  | 5.53783500  | 1.88266000 |
| C | 10.37175900 | 3.62524900  | 2.05374300 |
| C | 11.24211800 | 2.55526700  | 2.32193000 |
| C | 9.10583900  | 3.35050800  | 1.51099400 |
| C | 10.85665000 | 1.23761800  | 2.05200200 |
| H | 12.21998800 | 2.76044900  | 2.76374700 |
| C | 8.71828800  | 2.03208100  | 1.24476600 |
| H | 8.40649900  | 4.16249500  | 1.29777100 |
| C | 9.59223100  | 0.97172200  | 1.51333000 |
| H | 11.54379400 | 0.41600300  | 2.27052500 |
| H | 7.72790900  | 1.83371100  | 0.82686000 |
| H | 9.28733400  | -0.05736900 | 1.30675000 |
| C | 10.95974300 | 9.46644800  | 3.52420600 |
| C | 12.09776800 | 9.07949800  | 2.79841600 |
| C | 10.06798200 | 10.38891700 | 2.94772200 |
| C | 12.34387400 | 9.60477100  | 1.52352000 |
| H | 12.79890700 | 8.36851300  | 3.24327300 |
| C | 10.31492900 | 10.91719500 | 1.67680700 |
| H | 9.17659500  | 10.70924500 | 3.49490900 |
| C | 11.45425700 | 10.52671900 | 0.96077800 |
| H | 13.23666200 | 9.29727900  | 0.97277500 |



|                               |             |             |             |
|-------------------------------|-------------|-------------|-------------|
| H                             | 9.61623500  | 11.63778900 | 1.24426100  |
| H                             | 11.64835600 | 10.94280800 | -0.03114500 |
| C                             | 9.59410800  | 6.48500300  | 8.05262100  |
| C                             | 8.98451300  | 5.71557400  | 6.91627200  |
| C                             | 9.67756200  | 4.66493000  | 6.30179800  |
| H                             | 10.71524000 | 4.49738100  | 6.60091900  |
| C                             | 9.26462800  | 4.07092900  | 5.08867300  |
| H                             | 8.21541200  | 3.85231800  | 4.88176400  |
| H                             | 9.98954900  | 3.41962300  | 4.59800700  |
| O                             | 11.43236800 | 6.25952000  | 5.06292500  |
| C                             | 12.42873400 | 5.45559900  | 5.18326200  |
| O                             | 12.45403800 | 4.22902200  | 5.08880600  |
| O                             | 13.56949800 | 6.16559500  | 5.44457700  |
| C                             | 14.76386800 | 5.39481400  | 5.58415200  |
| H                             | 14.99848300 | 4.85020700  | 4.65602200  |
| H                             | 15.56315100 | 6.11523000  | 5.80324000  |
| H                             | 14.67668500 | 4.67162400  | 6.40987100  |
| H                             | 9.19912400  | 7.50998100  | 8.11720200  |
| H                             | 7.89009300  | 5.72354500  | 6.87576100  |
| H                             | 4.43605100  | 3.63527900  | 1.45078700  |
| H                             | 3.77247900  | 2.10459100  | 3.30912000  |
| H                             | 4.65053000  | 2.50029000  | 5.61410100  |
| H                             | 9.34254600  | 5.99224500  | 9.00975600  |
| H                             | 10.68980700 | 6.53052400  | 7.96707200  |
| <b>IM4</b> <sup>triplet</sup> |             |             |             |
| Co                            | 9.43840600  | 6.14356500  | 4.51703700  |
| C                             | 7.03175700  | 7.69646200  | 2.79906200  |
| O                             | 9.10196800  | 9.85843800  | 6.51180300  |
| N                             | 9.43326100  | 8.16494200  | 5.08276100  |
| P                             | 7.23640700  | 6.49119200  | 4.18497100  |
| N                             | 9.64129600  | 6.14584500  | 2.46745700  |
| O                             | 9.56845700  | 6.73842100  | 0.31288400  |
| C                             | 5.93780000  | 8.57412300  | 2.83265100  |
| H                             | 5.25186700  | 8.55524200  | 3.68101500  |
| C                             | 5.70314500  | 9.47798100  | 1.79064700  |
| H                             | 4.84647900  | 10.15326500 | 1.84642000  |
| C                             | 6.55844700  | 9.50873600  | 0.68710800  |
| H                             | 6.38264000  | 10.20992300 | -0.13126400 |
| C                             | 7.64496700  | 8.63526300  | 0.63077200  |
| H                             | 8.31695200  | 8.65245000  | -0.22747800 |
| C                             | 7.89706300  | 7.73027600  | 1.67875900  |
| C                             | 9.05719500  | 6.83590300  | 1.53937200  |
| C                             | 10.74807100 | 5.37639200  | 1.85242600  |
| H                             | 11.68321800 | 5.67777700  | 2.34234400  |

|   |             |             |             |
|---|-------------|-------------|-------------|
| C | 10.72827100 | 5.86524500  | 0.38058700  |
| H | 11.61032200 | 6.46180700  | 0.11365100  |
| H | 10.58170500 | 5.06085200  | -0.35106900 |
| C | 4.62651500  | 7.81049200  | 7.10471600  |
| H | 3.60310800  | 7.58277400  | 7.41079000  |
| C | 5.19582800  | 7.11677000  | 6.03116600  |
| H | 4.59823400  | 6.36862500  | 5.50931000  |
| C | 6.50633300  | 7.38391000  | 5.60811500  |
| C | 6.66236100  | 9.08454900  | 7.35096800  |
| H | 7.23755900  | 9.85745700  | 7.86053200  |
| C | 5.36229700  | 8.79524000  | 7.76680900  |
| H | 4.92610000  | 9.34445400  | 8.60372100  |
| C | 8.63004100  | 8.76576400  | 5.90586500  |
| C | 7.25413900  | 8.38841100  | 6.27983600  |
| C | 10.45773400 | 10.08158100 | 6.04406900  |
| H | 11.11985100 | 10.07573700 | 6.91956000  |
| H | 10.48461100 | 11.06902600 | 5.56434400  |
| C | 10.72478100 | 8.90868400  | 5.06973500  |
| H | 11.48717500 | 8.22833500  | 5.46958900  |
| C | 6.10867100  | 5.11391500  | 3.73161900  |
| C | 5.67187500  | 4.17055600  | 4.68515600  |
| H | 5.91753400  | 4.28686600  | 5.74191800  |
| C | 4.88863900  | 3.08095500  | 4.29421300  |
| C | 4.53573400  | 2.90906800  | 2.95079400  |
| C | 4.96470500  | 3.83899500  | 1.99840900  |
| C | 5.74418200  | 4.93516100  | 2.38273500  |
| H | 6.06273400  | 5.65098700  | 1.62341700  |
| C | 10.58610400 | 3.87377900  | 2.00353000  |
| C | 11.73275700 | 3.06489200  | 2.06291100  |
| C | 9.32129300  | 3.26514900  | 2.02632100  |
| C | 11.61813900 | 1.67298400  | 2.13958600  |
| H | 12.72188700 | 3.53111100  | 2.05703900  |
| C | 9.20576900  | 1.87257100  | 2.11300800  |
| H | 8.42008700  | 3.88155600  | 1.98761900  |
| C | 10.35323500 | 1.07253500  | 2.16625700  |
| H | 12.51932400 | 1.05611300  | 2.18660200  |
| H | 8.21440300  | 1.41270600  | 2.13774800  |
| H | 10.26250400 | -0.01466700 | 2.23291900  |
| C | 11.15900600 | 9.34109100  | 3.68034900  |
| C | 12.40064300 | 8.92009500  | 3.17843000  |
| C | 10.36335400 | 10.19631200 | 2.89821100  |
| C | 12.84364200 | 9.34920900  | 1.92107400  |
| H | 13.01904900 | 8.24672600  | 3.77675200  |
| C | 10.80313200 | 10.62249100 | 1.64052000  |

|                               |             |             |             |
|-------------------------------|-------------|-------------|-------------|
| H                             | 9.39329900  | 10.53569900 | 3.27280900  |
| C                             | 12.04556700 | 10.20084600 | 1.14890100  |
| H                             | 13.81465400 | 9.01656600  | 1.54497300  |
| H                             | 10.17436700 | 11.28723100 | 1.04258600  |
| H                             | 12.39009400 | 10.53748200 | 0.16769500  |
| C                             | 9.21459500  | 6.64434100  | 9.51431800  |
| C                             | 8.66340400  | 6.02906400  | 8.26956900  |
| C                             | 9.40950600  | 5.54967900  | 7.24178000  |
| H                             | 10.50107400 | 5.61757200  | 7.31195900  |
| C                             | 8.86006800  | 4.92694100  | 6.04183500  |
| H                             | 7.80018100  | 4.67056600  | 6.12248800  |
| H                             | 9.47196800  | 4.10500100  | 5.63572500  |
| O                             | 11.34624900 | 5.98638900  | 4.80815800  |
| C                             | 12.10719000 | 4.99254500  | 5.13015700  |
| O                             | 11.78575500 | 3.89110700  | 5.56402600  |
| O                             | 13.41929600 | 5.32370000  | 4.93961400  |
| C                             | 14.37173300 | 4.32528500  | 5.30858800  |
| H                             | 14.23591200 | 3.40569600  | 4.71857200  |
| H                             | 15.35911600 | 4.75836300  | 5.10020700  |
| H                             | 14.29187800 | 4.07691100  | 6.37858200  |
| H                             | 8.82897400  | 7.67157400  | 9.64812400  |
| H                             | 7.57053600  | 5.94925800  | 8.20644500  |
| H                             | 4.69026300  | 3.71825200  | 0.94778700  |
| H                             | 3.92429200  | 2.05530000  | 2.64891200  |
| H                             | 4.55138900  | 2.36580000  | 5.04814800  |
| H                             | 8.89277900  | 6.08026500  | 10.40836100 |
| H                             | 10.31456400 | 6.68300100  | 9.50229400  |
| <b>IMS</b> <sup>triplet</sup> |             |             |             |
| Co                            | 9.53469000  | 5.94416200  | 4.70037500  |
| C                             | 11.77216900 | 5.64525800  | 2.26655300  |
| O                             | 8.26681000  | 2.61593600  | 2.55890600  |
| N                             | 8.97134000  | 4.67114100  | 3.10540000  |
| P                             | 11.60002300 | 5.20974900  | 4.04676100  |
| N                             | 10.07829100 | 7.74158500  | 3.74222300  |
| O                             | 10.64371200 | 9.12927700  | 2.07511600  |
| C                             | 12.43737600 | 4.75432800  | 1.41238700  |
| H                             | 12.79982200 | 3.80021400  | 1.79972900  |
| C                             | 12.65944100 | 5.07634800  | 0.06842700  |
| H                             | 13.17882900 | 4.36481400  | -0.57737700 |
| C                             | 12.22615200 | 6.30425500  | -0.43598500 |
| H                             | 12.39986100 | 6.56548000  | -1.48185400 |
| C                             | 11.56257300 | 7.20219300  | 0.40152600  |
| H                             | 11.21759000 | 8.16016100  | 0.01262900  |
| C                             | 11.32042500 | 6.88332300  | 1.75053900  |

|   |             |             |             |
|---|-------------|-------------|-------------|
| C | 10.64460700 | 7.89328100  | 2.58086800  |
| C | 9.73240000  | 9.10521400  | 4.23659300  |
| H | 8.70803600  | 9.11186100  | 4.61667700  |
| C | 9.81755100  | 9.94406300  | 2.94645400  |
| H | 8.83932500  | 10.06658000 | 2.45850800  |
| H | 10.30676800 | 10.91710800 | 3.06791600  |
| C | 12.61912200 | 1.23202500  | 4.51954200  |
| H | 13.49027600 | 0.67293700  | 4.86822700  |
| C | 12.66552500 | 2.63117300  | 4.48670800  |
| H | 13.57446500 | 3.14222300  | 4.80750600  |
| C | 11.56593600 | 3.37725700  | 4.04123800  |
| C | 10.36468200 | 1.28879300  | 3.65387200  |
| H | 9.46326900  | 0.77032300  | 3.32657400  |
| C | 11.46694900 | 0.56076300  | 4.10573200  |
| H | 11.42240700 | -0.52999700 | 4.13161900  |
| C | 9.20509600  | 3.39391900  | 3.10229200  |
| C | 10.39478700 | 2.69427800  | 3.61559600  |
| C | 7.11792400  | 3.45958300  | 2.27810800  |
| H | 6.35890700  | 3.24331500  | 3.04076800  |
| H | 6.74579800  | 3.19868800  | 1.28019700  |
| C | 7.67779100  | 4.89260800  | 2.39442900  |
| H | 7.03716600  | 5.50983800  | 3.03426400  |
| C | 13.20633100 | 5.72492900  | 4.77777100  |
| C | 13.49249300 | 5.48409500  | 6.13772400  |
| H | 12.78280700 | 4.95606400  | 6.77527700  |
| C | 14.70579100 | 5.90213500  | 6.69082700  |
| C | 15.64862600 | 6.57286100  | 5.90303300  |
| C | 15.37121200 | 6.82229400  | 4.55550300  |
| C | 14.16013700 | 6.40312800  | 3.99391500  |
| H | 13.96839300 | 6.60691000  | 2.93972500  |
| C | 10.66169500 | 9.58533300  | 5.34039500  |
| C | 10.12585000 | 10.31927600 | 6.41118500  |
| C | 12.05099600 | 9.38695500  | 5.28026300  |
| C | 10.96082300 | 10.84759200 | 7.40262800  |
| H | 9.04602200  | 10.48256200 | 6.46529500  |
| C | 12.88608200 | 9.91105700  | 6.27328100  |
| H | 12.49113400 | 8.82042300  | 4.45606100  |
| C | 12.34383300 | 10.64312000 | 7.33696900  |
| H | 10.52827900 | 11.41644800 | 8.22964500  |
| H | 13.96505000 | 9.74816300  | 6.21414600  |
| H | 12.99755900 | 11.05219900 | 8.11146900  |
| C | 7.86366400  | 5.60572400  | 1.06391800  |
| C | 7.34353400  | 6.89674900  | 0.88168400  |
| C | 8.51057800  | 4.97600000  | -0.01447900 |

|                               |             |            |             |
|-------------------------------|-------------|------------|-------------|
| C                             | 7.46546300  | 7.54851500 | -0.35223600 |
| H                             | 6.82918000  | 7.39154200 | 1.71027700  |
| C                             | 8.62765000  | 5.62252400 | -1.24858100 |
| H                             | 8.92043600  | 3.96887900 | 0.10427800  |
| C                             | 8.10515400  | 6.91134300 | -1.42097100 |
| H                             | 7.05195300  | 8.55237700 | -0.47921200 |
| H                             | 9.12814000  | 5.11868000 | -2.07927800 |
| H                             | 8.19511500  | 7.41514500 | -2.38672900 |
| C                             | 9.08087900  | 7.76356100 | 9.18294000  |
| C                             | 9.01365000  | 6.69176300 | 8.14803100  |
| C                             | 10.07703200 | 6.21463200 | 7.44507900  |
| H                             | 11.06143000 | 6.66701100 | 7.61628700  |
| C                             | 10.01252300 | 5.09748000 | 6.51822700  |
| H                             | 9.08237000  | 4.51044400 | 6.50616400  |
| H                             | 10.89441100 | 4.45101100 | 6.51447900  |
| O                             | 5.60827800  | 5.29654900 | 6.12496600  |
| C                             | 6.69259100  | 4.99926100 | 5.65778700  |
| O                             | 7.31570000  | 3.97078900 | 5.41373600  |
| O                             | 7.55893100  | 6.23764900 | 5.24904700  |
| C                             | 6.97010900  | 7.52094300 | 5.45074100  |
| H                             | 6.86130900  | 8.03975600 | 4.48496800  |
| H                             | 5.97756600  | 7.37480900 | 5.89708900  |
| H                             | 7.59068100  | 8.11873900 | 6.13603500  |
| H                             | 8.03126100  | 6.23095400 | 7.98690300  |
| H                             | 8.37927200  | 8.58340200 | 8.94688900  |
| H                             | 8.76092700  | 7.36661700 | 10.16366800 |
| H                             | 10.09350800 | 8.18005000 | 9.28653900  |
| H                             | 14.91237200 | 5.69940800 | 7.74429000  |
| H                             | 16.59618600 | 6.89857400 | 6.33883600  |
| H                             | 16.09967200 | 7.34380200 | 3.93010600  |
| <b>TS2</b> <sup>triplet</sup> |             |            |             |
| Co                            | 9.54263800  | 5.99463000 | 4.66570100  |
| C                             | 11.78890900 | 5.61024700 | 2.22913200  |
| O                             | 8.28219800  | 2.59739100 | 2.55458400  |
| N                             | 8.96120000  | 4.65665000 | 3.12180400  |
| P                             | 11.59555600 | 5.22374000 | 4.01887200  |
| N                             | 10.10658500 | 7.74947100 | 3.64681900  |
| O                             | 10.73738500 | 9.11073900 | 1.98050600  |
| C                             | 12.44312600 | 4.69234700 | 1.39515600  |
| H                             | 12.78949300 | 3.74047600 | 1.80207700  |
| C                             | 12.67417900 | 4.98414600 | 0.04572000  |
| H                             | 13.18371600 | 4.25158100 | -0.58427200 |
| C                             | 12.26342800 | 6.20907600 | -0.48446400 |
| H                             | 12.44516300 | 6.44647100 | -1.53467600 |

|   |             |             |             |
|---|-------------|-------------|-------------|
| C | 11.61385300 | 7.13499600  | 0.33331400  |
| H | 11.28779500 | 8.09176600  | -0.07453800 |
| C | 11.36128300 | 6.84523300  | 1.68670100  |
| C | 10.69831000 | 7.87956000  | 2.49688800  |
| C | 9.76179700  | 9.12145700  | 4.11916100  |
| H | 8.71831700  | 9.14463600  | 4.44364500  |
| C | 9.92753400  | 9.95909600  | 2.83424900  |
| H | 8.97174900  | 10.13386300 | 2.31909400  |
| H | 10.46117000 | 10.90585600 | 2.97688100  |
| C | 12.62363300 | 1.25596200  | 4.57406900  |
| H | 13.49558700 | 0.70625800  | 4.93550800  |
| C | 12.66478900 | 2.65465300  | 4.51810600  |
| H | 13.57111900 | 3.17391500  | 4.83310200  |
| C | 11.56416400 | 3.38950200  | 4.05689200  |
| C | 10.37305400 | 1.28942400  | 3.69769700  |
| H | 9.47485700  | 0.76260800  | 3.37465500  |
| C | 11.47619000 | 0.57314200  | 4.16615200  |
| H | 11.43619000 | -0.51726200 | 4.20929400  |
| C | 9.20787600  | 3.38309300  | 3.11151900  |
| C | 10.39827700 | 2.69412500  | 3.63775900  |
| C | 7.13463600  | 3.43329900  | 2.24566300  |
| H | 6.34506900  | 3.18921400  | 2.96822100  |
| H | 6.80488200  | 3.18706300  | 1.22914900  |
| C | 7.66771700  | 4.87311600  | 2.40953800  |
| H | 7.02451400  | 5.46252200  | 3.07356900  |
| C | 13.19808500 | 5.75065900  | 4.75173700  |
| C | 13.46787700 | 5.53746600  | 6.11953700  |
| H | 12.74982900 | 5.02117700  | 6.75736800  |
| C | 14.67384000 | 5.96807300  | 6.67910900  |
| C | 15.62517600 | 6.62483900  | 5.88958800  |
| C | 15.36410400 | 6.84641400  | 4.53394800  |
| C | 14.16064800 | 6.41355500  | 3.96597500  |
| H | 13.98173900 | 6.59459000  | 2.90527900  |
| C | 10.63886200 | 9.58204700  | 5.27257500  |
| C | 10.05440900 | 10.26666700 | 6.35045400  |
| C | 12.03296100 | 9.40815600  | 5.25400400  |
| C | 10.84589400 | 10.76932400 | 7.39013500  |
| H | 8.97102500  | 10.41195100 | 6.37261300  |
| C | 12.82444600 | 9.90648400  | 6.29446800  |
| H | 12.51078900 | 8.88212600  | 4.42389700  |
| C | 12.23336800 | 10.58852400 | 7.36567100  |
| H | 10.37542200 | 11.29980400 | 8.22190500  |
| H | 13.90746000 | 9.76326800  | 6.26693500  |
| H | 12.85293600 | 10.97766800 | 8.17763000  |

|                               |             |            |             |
|-------------------------------|-------------|------------|-------------|
| C                             | 7.84402600  | 5.63202300 | 1.10339700  |
| C                             | 7.33908600  | 6.93605700 | 0.97771700  |
| C                             | 8.47202000  | 5.03781600 | -0.00572900 |
| C                             | 7.45722400  | 7.63456600 | -0.23060200 |
| H                             | 6.84110800  | 7.40396100 | 1.83151600  |
| C                             | 8.58453400  | 5.73082900 | -1.21485100 |
| H                             | 8.87295900  | 4.02290800 | 0.06932100  |
| C                             | 8.07718500  | 7.03186100 | -1.33071500 |
| H                             | 7.05573100  | 8.64788800 | -0.31362000 |
| H                             | 9.07011500  | 5.25389300 | -2.06997000 |
| H                             | 8.16336200  | 7.57204100 | -2.27697300 |
| C                             | 9.07505000  | 7.70679700 | 9.24317800  |
| C                             | 8.99609200  | 6.66244700 | 8.17845400  |
| C                             | 10.04399100 | 6.22137700 | 7.43602100  |
| H                             | 11.02649400 | 6.68251600 | 7.59731800  |
| C                             | 9.97853800  | 5.13121900 | 6.46918300  |
| H                             | 9.05861900  | 4.53215500 | 6.48405800  |
| H                             | 10.86066200 | 4.48348600 | 6.46712500  |
| O                             | 5.58953900  | 5.31521000 | 6.19845100  |
| C                             | 6.56062000  | 4.82202800 | 5.71785000  |
| O                             | 7.18282700  | 3.84978100 | 5.40946900  |
| O                             | 7.66617400  | 6.28121300 | 5.16583100  |
| C                             | 7.14186400  | 7.53741600 | 5.51469600  |
| H                             | 6.94374300  | 8.15629400 | 4.61895600  |
| H                             | 6.18203500  | 7.39596500 | 6.03859500  |
| H                             | 7.81491100  | 8.09315000 | 6.19382000  |
| H                             | 8.01546600  | 6.19579500 | 8.02361700  |
| H                             | 8.37170500  | 8.53405900 | 9.03976200  |
| H                             | 8.77270600  | 7.28520800 | 10.21908700 |
| H                             | 10.08895600 | 8.12214900 | 9.34209700  |
| H                             | 14.86799700 | 5.78681800 | 7.73887000  |
| H                             | 16.56675600 | 6.96109600 | 6.33036700  |
| H                             | 16.09962700 | 7.35640200 | 3.90726100  |
| <b>IM6</b> <sup>triplet</sup> |             |            |             |
| Co                            | 9.74256000  | 5.74370800 | 4.45367300  |
| C                             | 7.46662100  | 7.57839300 | 2.80693500  |
| O                             | 9.44118200  | 9.23557100 | 6.81936100  |
| N                             | 9.72814100  | 7.72168200 | 5.19022700  |
| P                             | 7.54710700  | 6.22657100 | 4.06622600  |
| N                             | 9.97321800  | 5.88933400 | 2.41425000  |
| O                             | 10.02912600 | 6.67618500 | 0.32160600  |
| C                             | 6.43681100  | 8.52634700 | 2.89413900  |
| H                             | 5.72156500  | 8.47458800 | 3.71700000  |
| C                             | 6.30236400  | 9.53941300 | 1.93807900  |

|   |             |             |             |
|---|-------------|-------------|-------------|
| H | 5.49327200  | 10.26704300 | 2.03380700  |
| C | 7.19561900  | 9.61121100  | 0.86690400  |
| H | 7.09677600  | 10.39660900 | 0.11464100  |
| C | 8.22170600  | 8.67161800  | 0.75814700  |
| H | 8.92324300  | 8.72147200  | -0.07495900 |
| C | 8.37422900  | 7.65739600  | 1.72161000  |
| C | 9.47652800  | 6.70041800  | 1.53557600  |
| C | 11.04435800 | 5.09960800  | 1.77034600  |
| H | 11.97590900 | 5.27710500  | 2.32437700  |
| C | 11.13159100 | 5.72969500  | 0.35472800  |
| H | 12.05985000 | 6.29323900  | 0.19159600  |
| H | 10.97827700 | 5.01164300  | -0.46068500 |
| C | 4.86421700  | 7.31940400  | 7.02421800  |
| H | 3.82218500  | 7.09930600  | 7.26674800  |
| C | 5.44707600  | 6.73579000  | 5.89336300  |
| H | 4.84317100  | 6.07807100  | 5.26721600  |
| C | 6.78146700  | 6.99603500  | 5.54738700  |
| C | 6.93627800  | 8.46521400  | 7.49264600  |
| H | 7.52421200  | 9.14336200  | 8.11131200  |
| C | 5.61104700  | 8.18419700  | 7.82684100  |
| H | 5.16449100  | 8.64489300  | 8.71048200  |
| C | 8.93640400  | 8.24375300  | 6.07305900  |
| C | 7.53839400  | 7.88045400  | 6.36267500  |
| C | 10.85453500 | 9.33975300  | 6.49944000  |
| H | 11.41840800 | 8.95642000  | 7.36199600  |
| H | 11.08746000 | 10.40028400 | 6.34400900  |
| C | 11.02152800 | 8.45957100  | 5.24138200  |
| H | 11.80763500 | 7.70757100  | 5.37845100  |
| C | 6.35547900  | 4.98053000  | 3.42598100  |
| C | 5.88402400  | 3.93304500  | 4.24491900  |
| H | 6.14917600  | 3.88833100  | 5.30272900  |
| C | 5.04417700  | 2.94685200  | 3.71954000  |
| C | 4.66936400  | 2.98151000  | 2.37124600  |
| C | 5.13461200  | 4.01393200  | 1.55063500  |
| C | 5.97017600  | 5.00779600  | 2.07163600  |
| H | 6.31676100  | 5.80692600  | 1.41443000  |
| C | 10.75916100 | 3.60615000  | 1.76302400  |
| C | 11.83225400 | 2.70479700  | 1.65512200  |
| C | 9.45030100  | 3.10195600  | 1.80684800  |
| C | 11.59964300 | 1.32720800  | 1.58646800  |
| H | 12.85697500 | 3.08532300  | 1.62415500  |
| C | 9.21747900  | 1.72222300  | 1.74570800  |
| H | 8.60773000  | 3.79060200  | 1.89852900  |
| C | 10.29046500 | 0.83119500  | 1.63273800  |



|                               |             |             |             |
|-------------------------------|-------------|-------------|-------------|
| H                             | 12.44425800 | 0.63837600  | 1.50268800  |
| H                             | 8.19220300  | 1.34551800  | 1.78635800  |
| H                             | 10.10868600 | -0.24548700 | 1.58432000  |
| C                             | 11.29378800 | 9.22604500  | 3.95757600  |
| C                             | 12.40849400 | 8.89370400  | 3.17166200  |
| C                             | 10.47064700 | 10.29122000 | 3.55068100  |
| C                             | 12.69841800 | 9.60893500  | 2.00286800  |
| H                             | 13.05793800 | 8.07144000  | 3.48321800  |
| C                             | 10.76015200 | 11.00863500 | 2.38551000  |
| H                             | 9.59683400  | 10.56920900 | 4.14741700  |
| C                             | 11.87520900 | 10.66908500 | 1.60772200  |
| H                             | 13.57255600 | 9.33993400  | 1.40406500  |
| H                             | 10.11311900 | 11.83617800 | 2.08356000  |
| H                             | 12.10162200 | 11.23161400 | 0.69830500  |
| C                             | 9.27893800  | 5.46965200  | 9.54693500  |
| C                             | 8.80068300  | 5.06519800  | 8.18760600  |
| C                             | 9.60190000  | 4.76576900  | 7.13714300  |
| H                             | 10.68741300 | 4.83157900  | 7.27581400  |
| C                             | 9.12358300  | 4.37106700  | 5.80825300  |
| H                             | 8.05717900  | 4.12343400  | 5.80015900  |
| H                             | 9.70750500  | 3.56651700  | 5.32728400  |
| O                             | 11.51939500 | 5.57174300  | 4.92135800  |
| C                             | 12.30813200 | 4.42845300  | 5.02633100  |
| H                             | 11.73012900 | 3.50071100  | 5.22511300  |
| H                             | 12.90105700 | 4.24270400  | 4.10607300  |
| H                             | 13.03359300 | 4.53673600  | 5.85858300  |
| H                             | 7.71239800  | 5.00520000  | 8.05186600  |
| H                             | 8.89083500  | 6.46719500  | 9.82335700  |
| H                             | 8.91006100  | 4.77324100  | 10.32168700 |
| H                             | 10.37833500 | 5.49903400  | 9.60231900  |
| H                             | 4.68062500  | 2.14896300  | 4.37149200  |
| H                             | 4.01320900  | 2.20852600  | 1.96383700  |
| H                             | 4.84469500  | 4.05418400  | 0.49793700  |
| <b>IM6</b> <sup>triplet</sup> |             |             |             |
| C                             | 11.48708600 | 7.10783900  | 28.01798900 |
| O                             | 8.61483400  | 1.69053900  | 26.90826200 |
| N                             | 9.61417300  | 3.40165800  | 25.86493100 |
| P                             | 10.92410100 | 5.50754100  | 27.31927000 |
| N                             | 11.80485900 | 5.61482600  | 24.51212400 |
| O                             | 13.96510900 | 5.32589700  | 23.99923600 |
| C                             | 12.84717900 | 7.46859800  | 27.99469700 |
| H                             | 13.59980000 | 6.76573000  | 27.63276700 |
| C                             | 13.25120900 | 8.73152800  | 28.44223100 |
| C                             | 9.09092500  | 4.57761300  | 30.91764300 |

|   |             |            |             |
|---|-------------|------------|-------------|
| H | 9.08472700  | 4.98445500 | 31.93131000 |
| C | 9.88372000  | 5.18410100 | 29.93608200 |
| H | 10.48813900 | 6.05171200 | 30.20410900 |
| C | 9.91715700  | 4.69069400 | 28.62366800 |
| C | 10.54066300 | 8.03863800 | 28.49503500 |
| H | 9.48082200  | 7.77975700 | 28.53363500 |
| C | 10.95232400 | 9.29585500 | 28.94665200 |
| C | 12.30713000 | 9.64739300 | 28.91802200 |
| C | 8.32036900  | 3.45727200 | 30.60020200 |
| H | 7.69691100  | 2.98013200 | 31.35920000 |
| C | 8.35496400  | 2.93924100 | 29.30468200 |
| H | 7.76439300  | 2.05822900 | 29.05230100 |
| C | 9.14810800  | 2.91602700 | 26.97424000 |
| C | 9.14299100  | 3.54203700 | 28.30683600 |
| C | 8.57984000  | 1.30961900 | 25.50633300 |
| H | 7.53481400  | 1.37576500 | 25.17129200 |
| H | 8.93291300  | 0.27452900 | 25.42890900 |
| C | 9.48754500  | 2.34762000 | 24.81547500 |
| H | 8.98692800  | 2.78892300 | 23.94723400 |
| C | 12.46273500 | 4.48495800 | 27.25816600 |
| C | 12.86129600 | 3.77838200 | 28.40264800 |
| H | 12.24368400 | 3.80881100 | 29.30202200 |
| C | 14.04762700 | 3.03583000 | 28.41858700 |
| H | 14.33076300 | 2.49243800 | 29.32291100 |
| C | 14.86419100 | 2.99957200 | 27.28631100 |
| H | 15.79350400 | 2.42610600 | 27.29146600 |
| C | 14.48752200 | 3.70066800 | 26.13982000 |
| H | 15.11731100 | 3.67624000 | 25.25006600 |
| C | 13.28935100 | 4.43696100 | 26.10745500 |
| C | 12.95817500 | 5.15035600 | 24.86313800 |
| C | 13.40573200 | 5.93756500 | 22.80333900 |
| H | 13.44135500 | 5.18814800 | 22.00028700 |
| H | 14.03519800 | 6.79653100 | 22.54030300 |
| C | 11.96067500 | 6.31089400 | 23.20798300 |
| H | 11.22252400 | 5.88398900 | 22.51923600 |
| C | 8.70886300  | 6.98177100 | 25.75511200 |
| H | 9.35842500  | 7.72436000 | 26.23626700 |
| H | 8.40688000  | 7.31149400 | 24.75184300 |
| C | 7.60888800  | 6.50308400 | 26.59428500 |
| H | 7.83674800  | 6.34294500 | 27.65710600 |
| C | 6.34380000  | 6.23909700 | 26.18249200 |
| O | 9.24978500  | 5.24800600 | 23.55041100 |
| C | 7.90852400  | 5.12287700 | 23.19651000 |
| H | 7.32916900  | 4.45795500 | 23.87215200 |

|                               |             |             |             |
|-------------------------------|-------------|-------------|-------------|
| H                             | 7.38279300  | 6.10112900  | 23.17013400 |
| H                             | 7.83324600  | 4.69353500  | 22.17709900 |
| H                             | 6.08632900  | 6.41051300  | 25.13004200 |
| Co                            | 9.87600700  | 5.37802500  | 25.26868300 |
| C                             | 10.84727400 | 1.82889900  | 24.37582800 |
| C                             | 11.32275400 | 2.12949400  | 23.09002500 |
| C                             | 11.63794600 | 1.03524800  | 25.22572200 |
| C                             | 12.56185900 | 1.64285000  | 22.65561800 |
| H                             | 10.71392900 | 2.74837200  | 22.42628700 |
| C                             | 12.87416500 | 0.54566400  | 24.79181300 |
| H                             | 11.28785600 | 0.78939300  | 26.23245900 |
| C                             | 13.33926400 | 0.84775300  | 23.50510800 |
| H                             | 12.91672300 | 1.88145000  | 21.64958700 |
| H                             | 13.47643200 | -0.07454900 | 25.46048800 |
| H                             | 14.30427300 | 0.46215000  | 23.16641000 |
| C                             | 11.69109100 | 7.80125100  | 23.34015800 |
| C                             | 10.63317700 | 8.38695200  | 22.62784800 |
| C                             | 12.48879600 | 8.61501600  | 24.16371700 |
| C                             | 10.37735700 | 9.75991100  | 22.73148400 |
| H                             | 10.00401500 | 7.75848200  | 21.99275600 |
| C                             | 12.23218100 | 9.98559500  | 24.27188300 |
| H                             | 13.31862200 | 8.17958200  | 24.72781100 |
| C                             | 11.17531100 | 10.56202100 | 23.55488400 |
| H                             | 9.55105900  | 10.20247100 | 22.16904100 |
| H                             | 12.85932100 | 10.60572200 | 24.91757500 |
| H                             | 10.97556600 | 11.63341100 | 23.63867800 |
| C                             | 5.24124000  | 5.74556400  | 27.06602700 |
| H                             | 4.38724100  | 6.44705600  | 27.06482000 |
| H                             | 4.84326300  | 4.78053600  | 26.70220100 |
| H                             | 5.57751800  | 5.61003200  | 28.10578100 |
| H                             | 14.31147000 | 8.99488900  | 28.42103200 |
| H                             | 12.62572900 | 10.63179400 | 29.26945400 |
| H                             | 10.20832100 | 10.00237500 | 29.32236600 |
| <b>IM7a<sup>CSS</sup>-exo</b> |             |             |             |
| Co                            | 10.19166500 | 6.06262700  | 5.04594700  |
| C                             | 7.42503100  | 7.61603100  | 3.83061800  |
| O                             | 9.77451800  | 9.43506700  | 7.51146800  |
| N                             | 10.02993900 | 7.97518100  | 5.82732600  |
| P                             | 7.93779300  | 6.26308600  | 4.97263200  |
| N                             | 10.18723300 | 6.51769100  | 3.07463500  |
| O                             | 9.94823600  | 7.63934000  | 1.14893100  |
| C                             | 6.20761400  | 8.27459800  | 4.06300500  |
| H                             | 5.59847400  | 8.00120000  | 4.92637700  |
| C                             | 5.75180400  | 9.27659600  | 3.20060400  |

|   |             |             |            |
|---|-------------|-------------|------------|
| H | 4.80028000  | 9.77270200  | 3.40467900 |
| C | 6.51272700  | 9.63385900  | 2.08456600 |
| H | 6.16550600  | 10.41453500 | 1.40446400 |
| C | 7.72649000  | 8.99199400  | 1.84068500 |
| H | 8.32843900  | 9.27048900  | 0.97610400 |
| C | 8.19747600  | 7.98495100  | 2.70590800 |
| C | 9.47454900  | 7.34068500  | 2.36808700 |
| C | 11.28688700 | 6.03504600  | 2.19614400 |
| H | 12.21888700 | 6.06766800  | 2.76597300 |
| C | 11.28817500 | 7.09006200  | 1.07722500 |
| H | 11.99755100 | 7.90956300  | 1.26486200 |
| H | 11.43618900 | 6.68291900  | 0.07059800 |
| C | 5.57568100  | 6.91056300  | 8.32228000 |
| H | 4.62000900  | 6.54492000  | 8.70451300 |
| C | 6.06177000  | 6.42521800  | 7.10158900 |
| H | 5.47261200  | 5.69433000  | 6.54648100 |
| C | 7.28427100  | 6.87248400  | 6.58366200 |
| C | 7.52455100  | 8.32075400  | 8.53412400 |
| H | 8.10088400  | 9.06329400  | 9.08626700 |
| C | 6.30780000  | 7.85864500  | 9.03927500 |
| H | 5.93500600  | 8.24161200  | 9.99152400 |
| C | 9.30619600  | 8.38021900  | 6.82757900 |
| C | 8.02670300  | 7.83646600  | 7.31242400 |
| C | 11.13388800 | 9.65377000  | 7.03791900 |
| H | 11.81454900 | 9.17590600  | 7.75912900 |
| H | 11.31233000 | 10.73448000 | 7.00642400 |
| C | 11.14143200 | 8.96433000  | 5.66800200 |
| H | 12.05334800 | 8.38205500  | 5.49283600 |
| C | 6.84904900  | 4.85920300  | 4.49528100 |
| C | 6.73663700  | 3.73389800  | 5.33913700 |
| H | 7.23861200  | 3.71388500  | 6.30869000 |
| C | 5.96938400  | 2.63253000  | 4.94976600 |
| C | 5.31640900  | 2.63002300  | 3.71133100 |
| C | 5.43200800  | 3.73675600  | 2.86415200 |
| C | 6.19285900  | 4.84626600  | 3.25085500 |
| H | 6.26752500  | 5.70276900  | 2.57838300 |
| C | 11.05247600 | 4.62984000  | 1.66083500 |
| C | 12.16404000 | 3.81151200  | 1.39736700 |
| C | 9.77022700  | 4.15012400  | 1.34922600 |
| C | 11.99851200 | 2.54002700  | 0.83676700 |
| H | 13.16780300 | 4.17424600  | 1.63562200 |
| C | 9.60303000  | 2.87687600  | 0.79220700 |
| H | 8.88960400  | 4.76280600  | 1.55663900 |
| C | 10.71585300 | 2.06768300  | 0.53357100 |

|                                |             |             |             |
|--------------------------------|-------------|-------------|-------------|
| H                              | 12.87403400 | 1.91538500  | 0.64115500  |
| H                              | 8.59713500  | 2.51557600  | 0.56280100  |
| H                              | 10.58379800 | 1.07277300  | 0.10072600  |
| C                              | 10.91289800 | 9.92887600  | 4.51392700  |
| C                              | 11.87879700 | 10.04307700 | 3.50114300  |
| C                              | 9.79224700  | 10.77914200 | 4.47659100  |
| C                              | 11.73229500 | 10.98468400 | 2.47429100  |
| H                              | 12.75807300 | 9.39387200  | 3.52403400  |
| C                              | 9.64661700  | 11.72280600 | 3.45525700  |
| H                              | 9.02678800  | 10.71625400 | 5.25479800  |
| C                              | 10.61652600 | 11.82842300 | 2.44969000  |
| H                              | 12.49533400 | 11.06076800 | 1.69512700  |
| H                              | 8.77268800  | 12.37917700 | 3.44474700  |
| H                              | 10.50289400 | 12.56698800 | 1.65197200  |
| C                              | 10.74007600 | 5.67397500  | 8.21606100  |
| C                              | 10.03255900 | 5.13604700  | 7.00348400  |
| C                              | 10.72297300 | 4.36320400  | 6.05867300  |
| H                              | 11.79907300 | 4.25651500  | 6.20465000  |
| C                              | 10.19616400 | 4.02919600  | 4.78989700  |
| H                              | 9.15669000  | 3.71945600  | 4.65993800  |
| H                              | 10.89283700 | 3.60318000  | 4.06353000  |
| O                              | 12.06872100 | 6.42843300  | 4.99334000  |
| C                              | 13.17626700 | 5.59390700  | 4.99413700  |
| H                              | 13.07263900 | 4.68575200  | 4.35910800  |
| H                              | 14.04573000 | 6.15349000  | 4.58727700  |
| H                              | 13.48672700 | 5.24238100  | 6.00553300  |
| H                              | 8.95261000  | 4.99913600  | 7.11900000  |
| H                              | 10.25051700 | 6.57532600  | 8.61455100  |
| H                              | 4.92521600  | 3.74414200  | 1.89615600  |
| H                              | 4.71876800  | 1.76681800  | 3.40848100  |
| H                              | 5.88455100  | 1.77273200  | 5.61857700  |
| H                              | 10.71599900 | 4.92254100  | 9.02671500  |
| H                              | 11.79203000 | 5.91050000  | 7.99868500  |
| <b>IM7b<sup>CSS</sup>-endo</b> |             |             |             |
| C                              | 11.08284200 | 7.10246800  | 28.13040500 |
| O                              | 8.84991200  | 1.37551200  | 27.13442400 |
| N                              | 9.56614800  | 3.20896100  | 26.05774400 |
| P                              | 10.62758000 | 5.44591800  | 27.47235000 |
| N                              | 11.29713400 | 5.40895900  | 24.63246400 |
| O                              | 13.38465100 | 4.98774400  | 23.93490300 |
| C                              | 12.40506700 | 7.56573300  | 27.98625900 |
| H                              | 13.17286000 | 6.91987800  | 27.55700800 |
| C                              | 12.75490900 | 8.85597400  | 28.39895100 |
| C                              | 9.10277000  | 4.28484900  | 31.14888300 |

|    |             |            |             |
|----|-------------|------------|-------------|
| H  | 9.06049700  | 4.69430800 | 32.16062500 |
| C  | 9.71671700  | 5.02392500 | 30.13003600 |
| H  | 10.15767900 | 5.99217500 | 30.36973900 |
| C  | 9.78295800  | 4.52973700 | 28.82033100 |
| C  | 10.12154200 | 7.96266100 | 28.70022100 |
| H  | 9.09197800  | 7.63140800 | 28.84806100 |
| C  | 10.47832400 | 9.24953500 | 29.11405800 |
| C  | 11.79383400 | 9.70190300 | 28.96139000 |
| C  | 8.56007900  | 3.02924700 | 30.86995200 |
| H  | 8.08330900  | 2.44427100 | 31.65923900 |
| C  | 8.62769700  | 2.51752000 | 29.57261100 |
| H  | 8.20437600  | 1.53832000 | 29.34898100 |
| C  | 9.24497500  | 2.65679200 | 27.18889100 |
| C  | 9.22834700  | 3.25486200 | 28.53614100 |
| C  | 8.66353700  | 1.06059900 | 25.72739100 |
| H  | 7.58525600  | 1.12222100 | 25.51548100 |
| H  | 9.02175500  | 0.03876900 | 25.55784100 |
| C  | 9.47369300  | 2.14809500 | 25.00652100 |
| H  | 8.92917200  | 2.59709600 | 24.16832600 |
| C  | 12.24352600 | 4.55906800 | 27.40208800 |
| C  | 12.79740200 | 4.05350800 | 28.58809800 |
| H  | 12.26068300 | 4.16868200 | 29.53136700 |
| C  | 14.03758300 | 3.40706900 | 28.58658600 |
| H  | 14.44628700 | 3.02233500 | 29.52358500 |
| C  | 14.74665500 | 3.26032400 | 27.39134900 |
| H  | 15.71564400 | 2.75685400 | 27.38107600 |
| C  | 14.21250500 | 3.76030500 | 26.20404700 |
| H  | 14.75889700 | 3.64991300 | 25.26757200 |
| C  | 12.96149600 | 4.40685500 | 26.19464900 |
| C  | 12.47521000 | 4.94664600 | 24.91853400 |
| C  | 12.67464200 | 5.36736400 | 22.72678700 |
| H  | 12.49307600 | 4.45247600 | 22.14450200 |
| H  | 13.31141800 | 6.05675200 | 22.16076100 |
| C  | 11.37784200 | 5.99706500 | 23.26546100 |
| H  | 10.50893200 | 5.65161800 | 22.69940500 |
| C  | 8.90757300  | 7.09544900 | 25.23915300 |
| H  | 9.54529500  | 7.93093000 | 25.54344300 |
| H  | 8.57088100  | 7.13568700 | 24.20168000 |
| C  | 8.08179000  | 6.51364900 | 26.24389000 |
| H  | 8.17066100  | 6.87347500 | 27.27434400 |
| C  | 7.38170000  | 5.32094500 | 26.05388800 |
| H  | 7.09983300  | 5.02401500 | 25.04400000 |
| Co | 9.52394900  | 5.20810700 | 25.54212300 |
| C  | 10.83247900 | 1.66900800 | 24.52142800 |

|                              |             |             |             |
|------------------------------|-------------|-------------|-------------|
| C                            | 11.16920800 | 1.79934600  | 23.16472600 |
| C                            | 11.73558500 | 1.01936800  | 25.38277300 |
| C                            | 12.37989100 | 1.29279100  | 22.67546100 |
| H                            | 10.47096400 | 2.29621900  | 22.48658600 |
| C                            | 12.94435900 | 0.51157400  | 24.89596000 |
| H                            | 11.49318900 | 0.89734600  | 26.44243200 |
| C                            | 13.27055100 | 0.64682600  | 23.53999000 |
| H                            | 12.62435000 | 1.39958000  | 21.61532100 |
| H                            | 13.63352200 | 0.00641800  | 25.57756400 |
| H                            | 14.21419400 | 0.24715700  | 23.15981800 |
| C                            | 11.42604800 | 7.51805300  | 23.27184800 |
| C                            | 10.72258800 | 8.23246000  | 22.28846400 |
| C                            | 12.22348800 | 8.23056100  | 24.18302400 |
| C                            | 10.80546800 | 9.62814600  | 22.22071400 |
| H                            | 10.10289200 | 7.68947500  | 21.56961100 |
| C                            | 12.30600600 | 9.62589700  | 24.11862000 |
| H                            | 12.78255700 | 7.69929400  | 24.95694300 |
| C                            | 11.59617200 | 10.32984900 | 23.13783300 |
| H                            | 10.24809300 | 10.16772600 | 21.45054300 |
| H                            | 12.92701300 | 10.16489500 | 24.83884300 |
| H                            | 11.65963000 | 11.41993900 | 23.08922700 |
| H                            | 9.72125200  | 9.89835800  | 29.56088600 |
| H                            | 12.06898000 | 10.70881600 | 29.28445800 |
| H                            | 13.78669500 | 9.19571300  | 28.28123000 |
| C                            | 6.61208300  | 4.65406600  | 27.15268000 |
| H                            | 5.54331800  | 4.91284900  | 27.03584400 |
| H                            | 6.66779700  | 3.55607400  | 27.09100200 |
| H                            | 6.93207800  | 4.97652700  | 28.15355100 |
| O                            | 8.87499900  | 4.61403900  | 23.81732400 |
| C                            | 8.05257500  | 5.22614300  | 22.88683900 |
| H                            | 8.51115100  | 6.10117600  | 22.36913800 |
| H                            | 7.80263200  | 4.49395200  | 22.09007000 |
| H                            | 7.07338200  | 5.58376200  | 23.28541000 |
| <b>(R)-TS4<sup>CSS</sup></b> |             |             |             |
| C                            | 11.92827200 | 7.71857700  | 27.67541400 |
| O                            | 8.78610000  | 2.32978200  | 27.85835800 |
| N                            | 9.79444200  | 3.75246100  | 26.43877200 |
| P                            | 11.25456100 | 6.03700500  | 27.33096200 |
| N                            | 11.79807000 | 5.29985100  | 24.54495500 |
| O                            | 13.84055500 | 4.58057600  | 23.94504400 |
| C                            | 13.30853200 | 7.97557900  | 27.57217300 |
| H                            | 14.00645400 | 7.16345700  | 27.36019600 |
| C                            | 13.80588000 | 9.27284800  | 27.74393400 |
| C                            | 9.69394600  | 5.91902600  | 31.17913200 |

|    |             |             |             |
|----|-------------|-------------|-------------|
| H  | 9.76111400  | 6.52976000  | 32.08242100 |
| C  | 10.39376400 | 6.30580600  | 30.02957400 |
| H  | 11.00550300 | 7.20860200  | 30.06091500 |
| C  | 10.32761900 | 5.55066500  | 28.84965300 |
| C  | 11.05802600 | 8.79454700  | 27.94957100 |
| H  | 9.98236100  | 8.62950000  | 28.04135800 |
| C  | 11.56045300 | 10.08724500 | 28.12566800 |
| C  | 12.93520000 | 10.33156700 | 28.02147000 |
| C  | 8.92246800  | 4.75506700  | 31.16706900 |
| H  | 8.37510200  | 4.44362800  | 32.05941700 |
| C  | 8.85163000  | 3.98483700  | 30.00529400 |
| H  | 8.25183400  | 3.07465400  | 29.98783900 |
| C  | 9.40752200  | 3.50825300  | 27.65131500 |
| C  | 9.54025500  | 4.36828900  | 28.83863700 |
| C  | 8.53875200  | 1.76172500  | 26.54452200 |
| H  | 7.48090900  | 1.94043500  | 26.29703400 |
| H  | 8.73274200  | 0.68378200  | 26.59836300 |
| C  | 9.50032800  | 2.53764700  | 25.62702500 |
| H  | 9.01809900  | 2.89409700  | 24.70795200 |
| C  | 12.74832800 | 4.96087700  | 27.44069300 |
| C  | 13.27149600 | 4.61762800  | 28.69750400 |
| H  | 12.77861000 | 4.97344200  | 29.60420100 |
| C  | 14.42182300 | 3.83101700  | 28.81240300 |
| H  | 14.80724700 | 3.57728500  | 29.80260100 |
| C  | 15.07337100 | 3.37848100  | 27.66113800 |
| H  | 15.97263500 | 2.76361000  | 27.73985100 |
| C  | 14.57011600 | 3.71184500  | 26.40415700 |
| H  | 15.07065700 | 3.35814600  | 25.50287100 |
| C  | 13.40595800 | 4.49634600  | 26.27691200 |
| C  | 12.94380400 | 4.81800400  | 24.91953000 |
| C  | 13.13996800 | 4.74499600  | 22.68867800 |
| H  | 12.89168500 | 3.74337300  | 22.30694000 |
| H  | 13.80863400 | 5.25959600  | 21.98883900 |
| C  | 11.88883800 | 5.55363500  | 23.08658500 |
| H  | 10.99438000 | 5.13863600  | 22.61227000 |
| C  | 9.48074300  | 7.38923200  | 25.11910700 |
| H  | 10.12239300 | 8.22594300  | 25.42272500 |
| H  | 9.10534300  | 7.50332800  | 24.09543400 |
| C  | 8.57857800  | 6.86728400  | 26.13270200 |
| H  | 8.68790100  | 7.23205900  | 27.16156200 |
| C  | 7.32948900  | 6.22948100  | 25.87423300 |
| H  | 7.21959600  | 5.75720600  | 24.89794800 |
| Co | 10.08105900 | 5.58849500  | 25.51821400 |
| C  | 10.75799300 | 1.76133900  | 25.26987100 |



|   |             |             |             |
|---|-------------|-------------|-------------|
| C | 11.05531900 | 1.49562600  | 23.92363500 |
| C | 11.60602900 | 1.24063300  | 26.26407200 |
| C | 12.17236500 | 0.72544100  | 23.57506200 |
| H | 10.40156200 | 1.89338400  | 23.14295100 |
| C | 12.72082900 | 0.46988100  | 25.91859200 |
| H | 11.39473000 | 1.43110600  | 27.32014600 |
| C | 13.00811400 | 0.21012900  | 24.57202200 |
| H | 12.38728000 | 0.52639300  | 22.52179000 |
| H | 13.36797000 | 0.07038400  | 26.70371500 |
| H | 13.87894500 | -0.39305900 | 24.30257300 |
| C | 12.01483800 | 7.03147600  | 22.74219600 |
| C | 11.62822600 | 7.46170300  | 21.46030700 |
| C | 12.58153100 | 7.96426200  | 23.62416000 |
| C | 11.80418100 | 8.79364800  | 21.06970000 |
| H | 11.18859000 | 6.74482400  | 20.76105600 |
| C | 12.75384300 | 9.29876600  | 23.23637200 |
| H | 12.87890700 | 7.65342900  | 24.62828500 |
| C | 12.36710900 | 9.71815400  | 21.95826000 |
| H | 11.49684000 | 9.11046700  | 20.06953700 |
| H | 13.19162100 | 10.01264500 | 23.93911000 |
| H | 12.50179600 | 10.76001500 | 21.65631000 |
| N | 6.01703300  | 7.67421300  | 25.34911600 |
| H | 6.37653200  | 7.91974400  | 24.42344600 |
| C | 5.94662800  | 8.78752500  | 26.22267700 |
| C | 5.01453100  | 8.80707100  | 27.27463400 |
| C | 6.86481000  | 9.84182000  | 26.08107100 |
| C | 5.00195100  | 9.87983700  | 28.17059300 |
| H | 4.29776100  | 7.98876200  | 27.37799500 |
| C | 6.84385700  | 10.90879000 | 26.98463600 |
| H | 7.58123600  | 9.82778700  | 25.25647900 |
| C | 5.91625000  | 10.93257000 | 28.03320400 |
| H | 4.26861500  | 9.89285800  | 28.98087500 |
| H | 7.55674100  | 11.72836800 | 26.86334800 |
| H | 5.90087900  | 11.76927500 | 28.73565200 |
| H | 5.12447400  | 7.18385400  | 25.24649600 |
| H | 10.87098000 | 10.90635600 | 28.34469600 |
| H | 13.32529400 | 11.34314400 | 28.15828900 |
| H | 14.88105700 | 9.45124600  | 27.66352400 |
| C | 6.56457500  | 5.57492400  | 26.98779400 |
| H | 6.58698200  | 6.17159900  | 27.91230500 |
| H | 5.52060700  | 5.37671500  | 26.70419000 |
| H | 7.02726400  | 4.59913000  | 27.20726000 |
| O | 9.13792600  | 4.82594800  | 24.00722900 |
| C | 8.57338200  | 5.42476200  | 22.89870100 |

|                        |             |             |             |
|------------------------|-------------|-------------|-------------|
| H                      | 8.30147900  | 4.64629400  | 22.15149100 |
| H                      | 7.62560300  | 5.98748400  | 23.09495700 |
| H                      | 9.23414000  | 6.14448300  | 22.36347100 |
| (S)-TS4 <sup>CSS</sup> |             |             |             |
| Co                     | 10.04443000 | 6.12026100  | 4.76794200  |
| C                      | 7.43170800  | 7.35766000  | 3.13383300  |
| O                      | 9.16767400  | 9.77804600  | 6.73280100  |
| N                      | 9.71331700  | 8.11024400  | 5.32488300  |
| P                      | 7.84081400  | 6.15315000  | 4.47951000  |
| N                      | 10.20570800 | 6.16028600  | 2.78817400  |
| O                      | 10.07872600 | 6.80065600  | 0.63961800  |
| C                      | 6.23063000  | 8.08225700  | 3.18201900  |
| H                      | 5.55406000  | 7.95446300  | 4.02893900  |
| C                      | 5.87275900  | 8.96166100  | 2.15417600  |
| H                      | 4.93144200  | 9.51234300  | 2.21848600  |
| C                      | 6.71473400  | 9.12633300  | 1.05070500  |
| H                      | 6.44218500  | 9.80934600  | 0.24322500  |
| C                      | 7.91165900  | 8.41384300  | 0.98349200  |
| H                      | 8.57763600  | 8.53763500  | 0.12937700  |
| C                      | 8.28425300  | 7.53396200  | 2.01819600  |
| C                      | 9.54761100  | 6.80223900  | 1.87436200  |
| C                      | 11.35450700 | 5.49865500  | 2.12260700  |
| H                      | 12.25352700 | 5.71743700  | 2.70635600  |
| C                      | 11.40059800 | 6.21762000  | 0.75777500  |
| H                      | 12.13372300 | 7.03760700  | 0.73726100  |
| H                      | 11.55743300 | 5.55185800  | -0.09898400 |
| C                      | 5.05820500  | 7.06056900  | 7.42664400  |
| H                      | 4.09643400  | 6.66680000  | 7.76336900  |
| C                      | 5.72287300  | 6.44354600  | 6.35989600  |
| H                      | 5.26155300  | 5.58464200  | 5.87024500  |
| C                      | 6.96004200  | 6.92027700  | 5.90352400  |
| C                      | 6.84942400  | 8.67122900  | 7.60147900  |
| H                      | 7.29651900  | 9.54111000  | 8.08300900  |
| C                      | 5.62034100  | 8.18048500  | 8.04432300  |
| H                      | 5.10558900  | 8.67296600  | 8.87213100  |
| C                      | 8.84168500  | 8.60814900  | 6.14638600  |
| C                      | 7.53723200  | 8.05049600  | 6.54103000  |
| C                      | 10.56457800 | 10.01575700 | 6.41355100  |
| H                      | 11.16101600 | 9.71662500  | 7.28950000  |
| H                      | 10.69327700 | 11.08776600 | 6.22252000  |
| C                      | 10.81432000 | 9.11283700  | 5.19768500  |
| H                      | 11.75111100 | 8.54731400  | 5.26864300  |
| C                      | 6.83998600  | 4.67887400  | 4.00193000  |
| C                      | 6.71779200  | 3.59147000  | 4.88991600  |

|   |             |             |            |
|---|-------------|-------------|------------|
| H | 7.15288900  | 3.64420100  | 5.88875400 |
| C | 6.02167400  | 2.43855600  | 4.51461900 |
| C | 5.44817900  | 2.34463300  | 3.24096800 |
| C | 5.57057400  | 3.41427700  | 2.34825300 |
| C | 6.25904000  | 4.57391000  | 2.72388400 |
| H | 6.33841400  | 5.39745300  | 2.01211300 |
| C | 11.18668600 | 3.99174900  | 1.99124800 |
| C | 12.33354900 | 3.17936700  | 1.97111100 |
| C | 9.93071400  | 3.39079100  | 1.81295200 |
| C | 12.22800200 | 1.79703500  | 1.77966600 |
| H | 13.31845500 | 3.63507800  | 2.10679000 |
| C | 9.82295000  | 2.00755600  | 1.62536300 |
| H | 9.02486900  | 4.00085300  | 1.83472300 |
| C | 10.97055100 | 1.20584900  | 1.60772500 |
| H | 13.13071200 | 1.18046700  | 1.76965900 |
| H | 8.83614300  | 1.55564600  | 1.49440800 |
| H | 10.88534700 | 0.12581000  | 1.46252500 |
| C | 10.76472300 | 9.83712700  | 3.86121600 |
| C | 11.78139600 | 9.62941100  | 2.91569100 |
| C | 9.73885100  | 10.75238500 | 3.56102000 |
| C | 11.77951400 | 10.32363600 | 1.69885800 |
| H | 12.57867100 | 8.91713400  | 3.14182100 |
| C | 9.73588000  | 11.44768000 | 2.34773000 |
| H | 8.93715000  | 10.93302400 | 4.28272800 |
| C | 10.75787500 | 11.23637500 | 1.41280800 |
| H | 12.58168800 | 10.15424500 | 0.97558000 |
| H | 8.93401700  | 12.15853200 | 2.13193600 |
| H | 10.75766900 | 11.78292100 | 0.46617700 |
| C | 9.39412000  | 5.89179300  | 8.68353100 |
| C | 9.31031600  | 4.98767700  | 7.49030700 |
| C | 10.32700600 | 5.01442100  | 6.49336000 |
| H | 11.30141500 | 5.34298800  | 6.86863900 |
| C | 10.30150900 | 4.26187200  | 5.25030200 |
| H | 9.45532800  | 3.58406700  | 5.07435200 |
| H | 11.25227500 | 3.84066200  | 4.90193400 |
| O | 11.92192400 | 6.54403000  | 4.83972500 |
| C | 13.01286600 | 5.73677200  | 5.09114700 |
| H | 13.22169400 | 4.97685900  | 4.29959000 |
| H | 13.92912300 | 6.36373000  | 5.15705000 |
| H | 12.97108400 | 5.16847200  | 6.05102200 |
| H | 8.29924900  | 4.70850900  | 7.18208100 |
| H | 9.08504900  | 6.90692900  | 8.38761100 |
| N | 9.55383600  | 3.18961000  | 8.41933600 |
| H | 9.65895900  | 2.59219200  | 7.59564400 |

|                                         |             |             |             |
|-----------------------------------------|-------------|-------------|-------------|
| C                                       | 8.53861500  | 2.74788500  | 9.30347400  |
| C                                       | 8.62713100  | 3.02308600  | 10.67934700 |
| C                                       | 7.40590600  | 2.08902400  | 8.79378900  |
| C                                       | 7.58860100  | 2.63915700  | 11.53285600 |
| H                                       | 9.51369800  | 3.52507100  | 11.07469000 |
| C                                       | 6.37470500  | 1.70935200  | 9.65667000  |
| H                                       | 7.34587100  | 1.86697400  | 7.72547400  |
| C                                       | 6.45835700  | 1.98425300  | 11.02790000 |
| H                                       | 7.66796800  | 2.85058300  | 12.60217500 |
| H                                       | 5.50108200  | 1.19128200  | 9.25316500  |
| H                                       | 5.65021400  | 1.68469000  | 11.69926600 |
| H                                       | 10.46500300 | 3.30213900  | 8.87157700  |
| H                                       | 5.12578700  | 3.35281900  | 1.35194200  |
| H                                       | 4.90694900  | 1.44189100  | 2.94720400  |
| H                                       | 5.92910100  | 1.61050900  | 5.22174400  |
| H                                       | 8.71820000  | 5.57095400  | 9.48931200  |
| H                                       | 10.42369800 | 5.95375700  | 9.06803800  |
| <b><i>E-TS3a</i></b> <sup>triplet</sup> |             |             |             |
| Co                                      | 9.83217500  | 6.27024300  | 4.59871800  |
| C                                       | 7.27519700  | 7.73432800  | 2.80459100  |
| O                                       | 9.26427800  | 10.20069900 | 6.33299700  |
| N                                       | 9.55029200  | 8.48154700  | 4.90563600  |
| P                                       | 7.44962300  | 6.62066700  | 4.27086600  |
| N                                       | 9.78302100  | 5.95605500  | 2.51999400  |
| O                                       | 9.85769900  | 6.64480000  | 0.38556300  |
| C                                       | 6.22617800  | 8.66678300  | 2.77338300  |
| H                                       | 5.54098400  | 8.73253300  | 3.62083200  |
| C                                       | 6.02838600  | 9.50954100  | 1.67483600  |
| H                                       | 5.20060900  | 10.22261200 | 1.68150200  |
| C                                       | 6.88674500  | 9.42925800  | 0.57591700  |
| H                                       | 6.74457700  | 10.08080800 | -0.28900800 |
| C                                       | 7.93631500  | 8.51076600  | 0.58639400  |
| H                                       | 8.61192800  | 8.44815400  | -0.26631000 |
| C                                       | 8.14912700  | 7.65854100  | 1.68965200  |
| C                                       | 9.28022700  | 6.71593500  | 1.59728300  |
| C                                       | 10.85212300 | 5.14172200  | 1.89652500  |
| H                                       | 11.75717400 | 5.23647800  | 2.50815200  |
| C                                       | 11.04617800 | 5.82820000  | 0.52465400  |
| H                                       | 11.91956100 | 6.49604900  | 0.50405200  |
| H                                       | 11.08373500 | 5.13639700  | -0.32537800 |
| C                                       | 4.86992200  | 8.07065200  | 7.18340700  |
| H                                       | 3.86305800  | 7.83500300  | 7.53627700  |
| C                                       | 5.41325100  | 7.34864100  | 6.11631400  |
| H                                       | 4.81428900  | 6.56344400  | 5.65336500  |

|   |             |             |             |
|---|-------------|-------------|-------------|
| C | 6.69940400  | 7.62396400  | 5.62177500  |
| C | 6.88537600  | 9.38966200  | 7.30518500  |
| H | 7.46752100  | 10.18937600 | 7.76324600  |
| C | 5.61046200  | 9.09215700  | 7.78462000  |
| H | 5.19687700  | 9.66019000  | 8.62080700  |
| C | 8.78759500  | 9.07079400  | 5.77208900  |
| C | 7.44624000  | 8.67155500  | 6.22932300  |
| C | 10.64050700 | 10.33749000 | 5.89564600  |
| H | 11.28726100 | 10.07186100 | 6.74561400  |
| H | 10.80753500 | 11.38617000 | 5.61957600  |
| C | 10.75956400 | 9.33789500  | 4.73157400  |
| H | 11.61666200 | 8.65942700  | 4.84415100  |
| C | 6.19539600  | 5.31314700  | 3.91887800  |
| C | 5.90175300  | 4.35859800  | 4.91577500  |
| H | 6.35834300  | 4.43933600  | 5.90545400  |
| C | 5.01137900  | 3.31171100  | 4.65922800  |
| C | 4.41607100  | 3.18342900  | 3.39769400  |
| C | 4.71180600  | 4.11507500  | 2.39766200  |
| C | 5.59043200  | 5.17487600  | 2.65556200  |
| H | 5.79891300  | 5.89738800  | 1.86410200  |
| C | 10.47440000 | 3.67358300  | 1.78043200  |
| C | 11.47181700 | 2.69174200  | 1.90173400  |
| C | 9.15810400  | 3.27181300  | 1.50100300  |
| C | 11.15977800 | 1.33537200  | 1.75274700  |
| H | 12.50030900 | 2.99240000  | 2.12060600  |
| C | 8.84395100  | 1.91583200  | 1.35495700  |
| H | 8.36691500  | 4.02019400  | 1.41086000  |
| C | 9.84319600  | 0.94287500  | 1.48141500  |
| H | 11.94670200 | 0.58328900  | 1.85380500  |
| H | 7.81318900  | 1.61907300  | 1.14387200  |
| H | 9.59713300  | -0.11617400 | 1.36907000  |
| C | 10.80826400 | 9.95943400  | 3.34470900  |
| C | 11.72072300 | 9.45930500  | 2.40125700  |
| C | 9.97825400  | 11.03437200 | 2.97932800  |
| C | 11.81291900 | 10.02558000 | 1.12388700  |
| H | 12.35420500 | 8.61401100  | 2.68226500  |
| C | 10.06755700 | 11.60074500 | 1.70306200  |
| H | 9.25841800  | 11.44086600 | 3.69573000  |
| C | 10.98756400 | 11.09996200 | 0.77235400  |
| H | 12.53311000 | 9.62890600  | 0.40316800  |
| H | 9.41851500  | 12.43858600 | 1.43503200  |
| H | 11.06022500 | 11.54711700 | -0.22250000 |
| C | 10.23805400 | 6.19577600  | 7.51042400  |
| C | 9.51703300  | 5.40911800  | 6.44090800  |

|                                  |             |            |             |
|----------------------------------|-------------|------------|-------------|
| C                                | 10.17369200 | 4.36871900 | 5.71676700  |
| H                                | 11.26086700 | 4.28482900 | 5.79479100  |
| C                                | 9.48636400  | 3.30611200 | 5.07428100  |
| H                                | 8.41401900  | 3.41939000 | 4.89793600  |
| H                                | 10.01512200 | 2.74425200 | 4.30160500  |
| O                                | 11.73783100 | 6.68293400 | 4.62125500  |
| C                                | 12.86873000 | 5.93253200 | 4.86124900  |
| H                                | 13.79111800 | 6.48294200 | 4.56345800  |
| H                                | 13.01370400 | 5.66786000 | 5.93773500  |
| H                                | 12.90677000 | 4.96338800 | 4.30637800  |
| H                                | 9.74362400  | 7.15854400 | 7.71277200  |
| H                                | 8.44211800  | 5.28086000 | 6.61856800  |
| H                                | 4.25237100  | 4.02607900 | 1.40993500  |
| H                                | 3.72423200  | 2.36154300 | 3.19753300  |
| H                                | 4.78272600  | 2.59225500 | 5.44932500  |
| H                                | 10.24225600 | 5.63236100 | 8.46322200  |
| H                                | 11.28163400 | 6.39518300 | 7.22608700  |
| N                                | 9.33110500  | 1.74280600 | 6.21029800  |
| H                                | 8.79784600  | 1.08235000 | 5.63633400  |
| C                                | 8.75657700  | 1.94850000 | 7.49321500  |
| C                                | 9.56513000  | 2.38032500 | 8.55678700  |
| C                                | 7.37328900  | 1.78984700 | 7.67617100  |
| C                                | 8.98507000  | 2.64539900 | 9.80195400  |
| H                                | 10.64159100 | 2.49357900 | 8.40833500  |
| C                                | 6.80544800  | 2.05785700 | 8.92422100  |
| H                                | 6.75376600  | 1.44845600 | 6.84330700  |
| C                                | 7.60669900  | 2.48827400 | 9.99046500  |
| H                                | 9.61819800  | 2.97382800 | 10.62992500 |
| H                                | 5.72994000  | 1.92462700 | 9.06502000  |
| H                                | 7.15856600  | 2.69444700 | 10.96530800 |
| H                                | 10.30244700 | 1.42314400 | 6.26290900  |
| <i>E-TS3b</i> <sup>triplet</sup> |             |            |             |
| C                                | 11.82885900 | 7.61832700 | 27.93576800 |
| O                                | 9.02574800  | 2.04427900 | 28.23708700 |
| N                                | 9.68839700  | 3.55631500 | 26.71320100 |
| P                                | 11.11322600 | 5.96496200 | 27.53636100 |
| N                                | 11.68956400 | 5.71928100 | 24.64288300 |
| O                                | 13.73996200 | 5.12097900 | 23.94212500 |
| C                                | 13.21338300 | 7.84262600 | 28.05570000 |
| H                                | 13.91441100 | 7.00934600 | 27.97923400 |
| C                                | 13.70920300 | 9.13341900 | 28.27711400 |
| C                                | 9.74327500  | 5.76016900 | 31.45144900 |
| H                                | 9.80087400  | 6.38652600 | 32.34490500 |
| C                                | 10.37456900 | 6.17620700 | 30.27392300 |

|    |             |             |             |
|----|-------------|-------------|-------------|
| H  | 10.92188900 | 7.12051800  | 30.27105100 |
| C  | 10.32893300 | 5.40028000  | 29.10481900 |
| C  | 10.95553000 | 8.72111200  | 28.04091000 |
| H  | 9.87683300  | 8.57608700  | 27.95021900 |
| C  | 11.45303000 | 10.00634100 | 28.27540100 |
| C  | 12.83289100 | 10.21782900 | 28.39024400 |
| C  | 9.05569800  | 4.54406500  | 31.48292500 |
| H  | 8.56424900  | 4.20735800  | 32.39834200 |
| C  | 8.99555100  | 3.75734000  | 30.33234600 |
| H  | 8.45486700  | 2.81070700  | 30.34595000 |
| C  | 9.46857400  | 3.28866300  | 27.96311000 |
| C  | 9.61230400  | 4.17095100  | 29.13486600 |
| C  | 8.71501400  | 1.42534600  | 26.96275500 |
| H  | 7.62569300  | 1.48131300  | 26.81852700 |
| H  | 9.02840900  | 0.37590500  | 27.00594200 |
| C  | 9.48047300  | 2.28806700  | 25.94871300 |
| H  | 8.86424700  | 2.52090200  | 25.07386500 |
| C  | 12.61855100 | 4.89245500  | 27.45791500 |
| C  | 13.13601900 | 4.31499300  | 28.62880600 |
| H  | 12.63452500 | 4.49244800  | 29.58216800 |
| C  | 14.29290500 | 3.52893800  | 28.60664000 |
| H  | 14.67157000 | 3.09721900  | 29.53617500 |
| C  | 14.96181900 | 3.31065100  | 27.39985500 |
| H  | 15.86837300 | 2.70221100  | 27.36981000 |
| C  | 14.46324100 | 3.87216400  | 26.22422000 |
| H  | 14.97532300 | 3.69945800  | 25.27776000 |
| C  | 13.29186700 | 4.65545000  | 26.23177900 |
| C  | 12.83602700 | 5.19970600  | 24.93801500 |
| C  | 13.06048700 | 5.51234200  | 22.72299200 |
| H  | 12.89168900 | 4.60391100  | 22.12599700 |
| H  | 13.71570900 | 6.20129600  | 22.17557500 |
| C  | 11.74342700 | 6.14805600  | 23.22595400 |
| H  | 10.86716900 | 5.70112400  | 22.73645800 |
| C  | 8.67331800  | 7.70290700  | 24.82502400 |
| H  | 9.45696400  | 8.45634700  | 24.92994500 |
| H  | 8.64580300  | 7.19287700  | 23.85855200 |
| C  | 8.30684900  | 6.94752900  | 25.97288100 |
| H  | 8.45153800  | 7.40591900  | 26.95616500 |
| C  | 7.63664900  | 5.69848500  | 25.89715000 |
| H  | 7.23027200  | 5.41548300  | 24.92232500 |
| Co | 9.70774900  | 5.33699900  | 25.56200100 |
| C  | 10.80296300 | 1.70203800  | 25.46778600 |
| C  | 11.23975200 | 1.97043100  | 24.15977600 |
| C  | 11.59502500 | 0.88474500  | 26.29386000 |

|   |             |             |             |
|---|-------------|-------------|-------------|
| C | 12.43076000 | 1.41395100  | 23.67818000 |
| H | 10.64083500 | 2.64474100  | 23.54101800 |
| C | 12.78795000 | 0.33242600  | 25.81389200 |
| H | 11.28442300 | 0.66911300  | 27.31974800 |
| C | 13.20576900 | 0.58912300  | 24.50219400 |
| H | 12.75326100 | 1.62284000  | 22.65454100 |
| H | 13.39038000 | -0.30465000 | 26.46669300 |
| H | 14.13297800 | 0.14921400  | 24.12573400 |
| C | 11.70076200 | 7.65866700  | 23.06284200 |
| C | 11.01568700 | 8.21133200  | 21.96757300 |
| C | 12.37435400 | 8.52166400  | 23.94329700 |
| C | 11.00362600 | 9.59481600  | 21.75436700 |
| H | 10.48494800 | 7.54966000  | 21.27688100 |
| C | 12.36087300 | 9.90584800  | 23.73401600 |
| H | 12.90711800 | 8.11367300  | 24.80602700 |
| C | 11.67570600 | 10.44723000 | 22.63907500 |
| H | 10.46566700 | 10.00767700 | 20.89679300 |
| H | 12.88769900 | 10.56367500 | 24.43034400 |
| H | 11.66562200 | 11.52804000 | 22.47615300 |
| N | 7.33110800  | 9.04581200  | 24.34783300 |
| H | 7.38899400  | 9.71055000  | 25.12422200 |
| C | 6.01780600  | 8.54698100  | 24.14861500 |
| C | 5.62492000  | 8.08813400  | 22.88029100 |
| C | 5.14068800  | 8.44197800  | 25.23987400 |
| C | 4.35206400  | 7.53757900  | 22.70855400 |
| H | 6.31396200  | 8.17172100  | 22.03594300 |
| C | 3.86953800  | 7.88857600  | 25.05561400 |
| H | 5.45220100  | 8.80550000  | 26.22212900 |
| C | 3.47039400  | 7.43406100  | 23.79285200 |
| H | 4.04676500  | 7.18994500  | 21.71849900 |
| H | 3.18676200  | 7.81701100  | 25.90589800 |
| H | 2.47553300  | 7.00495500  | 23.65243900 |
| H | 7.72927900  | 9.47756700  | 23.50838000 |
| C | 6.89343700  | 5.13176900  | 27.07481900 |
| H | 5.85953300  | 5.52706400  | 27.08840900 |
| H | 6.80971000  | 4.03511600  | 27.02350400 |
| H | 7.36083600  | 5.40371000  | 28.03283700 |
| H | 14.78765000 | 9.28723600  | 28.36691000 |
| H | 13.22209200 | 11.22370600 | 28.56660000 |
| H | 10.75900100 | 10.84614500 | 28.36290100 |
| O | 9.33119300  | 4.62957400  | 23.77852700 |
| C | 8.19102000  | 4.19453900  | 23.13365300 |
| H | 8.43498900  | 3.71656200  | 22.15756600 |
| H | 7.59967300  | 3.43441400  | 23.70122000 |



|                        |             |             |             |
|------------------------|-------------|-------------|-------------|
| H                      | 7.46964000  | 5.01296700  | 22.89172600 |
| (R)-IM9 <sup>CSS</sup> |             |             |             |
| C                      | 11.94954800 | 7.76552400  | 27.69057700 |
| O                      | 8.74290100  | 2.41596400  | 27.83950100 |
| N                      | 9.78024600  | 3.83550500  | 26.43403800 |
| P                      | 11.29957600 | 6.07573700  | 27.33594700 |
| N                      | 11.84325000 | 5.26662400  | 24.54954100 |
| O                      | 13.87128100 | 4.48893700  | 23.95689700 |
| C                      | 13.31454100 | 8.06444100  | 27.52106400 |
| H                      | 14.02298500 | 7.27413400  | 27.26472900 |
| C                      | 13.78190400 | 9.37433800  | 27.68261500 |
| C                      | 9.80201900  | 5.91593100  | 31.21248600 |
| H                      | 9.89839600  | 6.50796800  | 32.12560800 |
| C                      | 10.48813400 | 6.30939400  | 30.05712900 |
| H                      | 11.11744400 | 7.20002500  | 30.09337600 |
| C                      | 10.38647000 | 5.57912900  | 28.86345100 |
| C                      | 11.06314900 | 8.81267100  | 28.01837500 |
| H                      | 9.99855400  | 8.61115600  | 28.15813000 |
| C                      | 11.53539400 | 10.11796300 | 28.18546300 |
| C                      | 12.89578800 | 10.40383200 | 28.01656400 |
| C                      | 9.00610400  | 4.76815500  | 31.19288100 |
| H                      | 8.46874900  | 4.45084800  | 32.08934700 |
| C                      | 8.89774000  | 4.02280200  | 30.01831800 |
| H                      | 8.27862200  | 3.12576100  | 29.99458700 |
| C                      | 9.40016600  | 3.58042700  | 27.64668800 |
| C                      | 9.57319100  | 4.41387600  | 28.84542400 |
| C                      | 8.45915000  | 1.88636500  | 26.51867300 |
| H                      | 7.40661400  | 2.11101800  | 26.28511200 |
| H                      | 8.61128000  | 0.80065500  | 26.54685900 |
| C                      | 9.44108100  | 2.64463000  | 25.60701100 |
| H                      | 8.96589700  | 3.02960200  | 24.69545000 |
| C                      | 12.81536600 | 5.02574300  | 27.45201600 |
| C                      | 13.36058000 | 4.73183100  | 28.71295300 |
| H                      | 12.87430300 | 5.11225400  | 29.61331800 |
| C                      | 14.52114400 | 3.96378600  | 28.84286200 |
| H                      | 14.92217700 | 3.75159700  | 29.83668600 |
| C                      | 15.16167600 | 3.47451000  | 27.69994300 |
| H                      | 16.06794900 | 2.87120500  | 27.78856500 |
| C                      | 14.63791800 | 3.75673600  | 26.43953000 |
| H                      | 15.12946400 | 3.37431600  | 25.54508700 |
| C                      | 13.46498300 | 4.52767100  | 26.29642800 |
| C                      | 12.98795500 | 4.79000700  | 24.93177700 |
| C                      | 13.14930800 | 4.58529600  | 22.70751700 |
| H                      | 12.87442900 | 3.56652700  | 22.39513800 |

|    |             |             |             |
|----|-------------|-------------|-------------|
| H  | 13.81106600 | 5.04186800  | 21.96198200 |
| C  | 11.92061200 | 5.43873400  | 23.07972200 |
| H  | 11.00820000 | 5.02135000  | 22.64165800 |
| C  | 9.50301400  | 7.47760100  | 25.19197000 |
| H  | 10.13535100 | 8.30618100  | 25.53877900 |
| H  | 9.14074300  | 7.63868500  | 24.16768600 |
| C  | 8.62819500  | 6.83766500  | 26.15827300 |
| H  | 8.70258000  | 7.18417800  | 27.19998500 |
| C  | 7.22936200  | 6.40920900  | 25.82114800 |
| H  | 7.23767300  | 5.79103900  | 24.91632200 |
| Co | 10.11851600 | 5.66383600  | 25.54015300 |
| C  | 10.66539100 | 1.82455100  | 25.23161900 |
| C  | 10.86641100 | 1.45177100  | 23.89260200 |
| C  | 11.56953600 | 1.36029200  | 26.20359800 |
| C  | 11.94366300 | 0.63332100  | 23.52973500 |
| H  | 10.16866000 | 1.80389400  | 23.12803500 |
| C  | 12.64615700 | 0.54251500  | 25.84377300 |
| H  | 11.43459500 | 1.63395100  | 27.25365300 |
| C  | 12.83720100 | 0.17650200  | 24.50505300 |
| H  | 12.08370500 | 0.35269600  | 22.48241600 |
| H  | 13.33885300 | 0.18956400  | 26.61217600 |
| H  | 13.67848100 | -0.46259800 | 24.22467800 |
| C  | 12.07385600 | 6.89523800  | 22.65906800 |
| C  | 11.75793300 | 7.25633100  | 21.33641300 |
| C  | 12.58925400 | 7.87621300  | 23.51970000 |
| C  | 11.95378800 | 8.56618900  | 20.88644600 |
| H  | 11.35608200 | 6.50284400  | 20.65288600 |
| C  | 12.78187000 | 9.18933900  | 23.07186500 |
| H  | 12.82699000 | 7.61862600  | 24.55403300 |
| C  | 12.46623900 | 9.53916200  | 21.75428900 |
| H  | 11.70111800 | 8.82872300  | 19.85567700 |
| H  | 13.17973800 | 9.94062200  | 23.75929500 |
| H  | 12.61606200 | 10.56404600 | 21.40502900 |
| N  | 6.36797000  | 7.65155200  | 25.35198300 |
| H  | 6.87917100  | 8.06282700  | 24.55773400 |
| C  | 6.07509500  | 8.69568800  | 26.33485800 |
| C  | 4.89014300  | 8.62889500  | 27.07357200 |
| C  | 6.99293200  | 9.73263200  | 26.52413800 |
| C  | 4.62817100  | 9.61772000  | 28.02781700 |
| H  | 4.17733600  | 7.82010000  | 26.89849700 |
| C  | 6.71992800  | 10.71469300 | 27.48232300 |
| H  | 7.90344300  | 9.77825300  | 25.92413100 |
| C  | 5.54240600  | 10.65711300 | 28.23638700 |
| H  | 3.70229100  | 9.57471200  | 28.60573200 |

|                              |             |             |             |
|------------------------------|-------------|-------------|-------------|
| H                            | 7.43097400  | 11.53032300 | 27.63253600 |
| H                            | 5.33248400  | 11.42770300 | 28.98179400 |
| H                            | 5.48577700  | 7.28929800  | 24.96173000 |
| H                            | 10.83471000 | 10.91452000 | 28.44830400 |
| H                            | 13.26298600 | 11.42491300 | 28.14634500 |
| H                            | 14.84603800 | 9.58584200  | 27.55078100 |
| C                            | 6.47987900  | 5.70305300  | 26.93692900 |
| H                            | 6.47479100  | 6.29074700  | 27.86786900 |
| H                            | 5.44029100  | 5.47861500  | 26.65018700 |
| H                            | 6.98162300  | 4.74834800  | 27.14349700 |
| O                            | 9.11316300  | 4.95919900  | 24.03070700 |
| C                            | 8.62112100  | 5.59648700  | 22.91012300 |
| H                            | 8.31849200  | 4.84327800  | 22.14767500 |
| H                            | 7.70497100  | 6.21757700  | 23.08368500 |
| H                            | 9.34084500  | 6.27630000  | 22.40027000 |
| <b>(S)-IM9<sup>CSS</sup></b> |             |             |             |
| Co                           | 9.99524300  | 6.07374500  | 4.78669800  |
| C                            | 7.43004900  | 7.34261900  | 3.08606600  |
| O                            | 9.14264500  | 9.72961300  | 6.73967100  |
| N                            | 9.68996600  | 8.05412600  | 5.33733600  |
| P                            | 7.82094500  | 6.13529600  | 4.44114800  |
| N                            | 10.20637300 | 6.16614900  | 2.77314400  |
| O                            | 10.12253100 | 6.81490600  | 0.62050500  |
| C                            | 6.22948300  | 8.06993800  | 3.12336700  |
| H                            | 5.54639100  | 7.94380700  | 3.96539200  |
| C                            | 5.87834100  | 8.94936000  | 2.09332600  |
| H                            | 4.93665900  | 9.50028900  | 2.15126500  |
| C                            | 6.72793300  | 9.11316200  | 0.99532500  |
| H                            | 6.46143900  | 9.79589800  | 0.18546400  |
| C                            | 7.92527700  | 8.40091700  | 0.93850000  |
| H                            | 8.59934400  | 8.52561500  | 0.09078000  |
| C                            | 8.29160800  | 7.52083500  | 1.97590200  |
| C                            | 9.56324100  | 6.80153100  | 1.84702200  |
| C                            | 11.37724800 | 5.52445700  | 2.13152900  |
| H                            | 12.25602900 | 5.74685400  | 2.74562700  |
| C                            | 11.44945300 | 6.25264700  | 0.77182300  |
| H                            | 12.17019400 | 7.08412700  | 0.77781500  |
| H                            | 11.64214800 | 5.59583700  | -0.08481900 |
| C                            | 4.98181400  | 7.05943800  | 7.33640400  |
| H                            | 4.00841800  | 6.67620900  | 7.65149800  |
| C                            | 5.66027500  | 6.44094500  | 6.27903200  |
| H                            | 5.19839600  | 5.59041900  | 5.77499500  |
| C                            | 6.91240700  | 6.90406500  | 5.84921300  |
| C                            | 6.79004800  | 8.64549800  | 7.55793600  |

|   |             |             |            |
|---|-------------|-------------|------------|
| H | 7.23918000  | 9.50623200  | 8.05398500 |
| C | 5.54618000  | 8.16817000  | 7.97284500 |
| H | 5.02138500  | 8.66177600  | 8.79378600 |
| C | 8.80871400  | 8.56444200  | 6.14083400 |
| C | 7.49101700  | 8.02304600  | 6.50647700 |
| C | 10.55140400 | 9.93597600  | 6.45584100 |
| H | 11.12161200 | 9.60984600  | 7.34000300 |
| H | 10.71188100 | 11.00672600 | 6.28211100 |
| C | 10.80559500 | 9.04232800  | 5.23415900 |
| H | 11.73384800 | 8.46264000  | 5.30864400 |
| C | 6.81056400  | 4.67010900  | 3.94676100 |
| C | 6.68192700  | 3.57888600  | 4.82940600 |
| H | 7.11584700  | 3.62825700  | 5.82908400 |
| C | 5.98541700  | 2.42825200  | 4.44758500 |
| C | 5.41701700  | 2.33996800  | 3.17111800 |
| C | 5.54641900  | 3.41245700  | 2.28272300 |
| C | 6.23580100  | 4.56944700  | 2.66568200 |
| H | 6.32071600  | 5.39520800  | 1.95697900 |
| C | 11.22720300 | 4.01631100  | 1.98472400 |
| C | 12.38293200 | 3.21684500  | 1.94612100 |
| C | 9.97709100  | 3.40177400  | 1.81129900 |
| C | 12.29171400 | 1.83546800  | 1.74054500 |
| H | 13.36385500 | 3.68225700  | 2.07806600 |
| C | 9.88338800  | 2.01940600  | 1.60943600 |
| H | 9.06518000  | 4.00182800  | 1.84925900 |
| C | 11.03981700 | 1.23122000  | 1.57266000 |
| H | 13.20143900 | 1.22962700  | 1.71621600 |
| H | 8.90059200  | 1.55758700  | 1.48244000 |
| H | 10.96599200 | 0.15191800  | 1.41600700 |
| C | 10.77684100 | 9.78500500  | 3.90699700 |
| C | 11.82188200 | 9.61484200  | 2.98510200 |
| C | 9.74069400  | 10.68463500 | 3.59428900 |
| C | 11.83601300 | 10.32767800 | 1.77901500 |
| H | 12.62999200 | 8.91760600  | 3.21987300 |
| C | 9.75378000  | 11.39893100 | 2.39226700 |
| H | 8.91789300  | 10.83819100 | 4.29814100 |
| C | 10.80264200 | 11.22270300 | 1.47999300 |
| H | 12.65947700 | 10.18569600 | 1.07397000 |
| H | 8.94286700  | 12.09650200 | 2.16708700 |
| H | 10.81425600 | 11.78290600 | 0.54143500 |
| C | 9.25998500  | 5.84338500  | 8.74086200 |
| C | 9.14525000  | 4.85611600  | 7.59087300 |
| C | 10.15177500 | 5.06662900  | 6.49160300 |
| H | 11.12066700 | 5.35429600  | 6.92293100 |

|                                    |             |             |             |
|------------------------------------|-------------|-------------|-------------|
| C                                  | 10.20773300 | 4.21663400  | 5.31467600  |
| H                                  | 9.36708700  | 3.53486900  | 5.11736900  |
| H                                  | 11.17106900 | 3.78099100  | 5.01802000  |
| O                                  | 11.89022400 | 6.45651600  | 4.88589600  |
| C                                  | 12.94333900 | 5.62746000  | 5.20574400  |
| H                                  | 13.17937000 | 4.85698100  | 4.43026300  |
| H                                  | 13.87345100 | 6.22745600  | 5.32603200  |
| H                                  | 12.82973200 | 5.06478100  | 6.16418200  |
| H                                  | 8.11149200  | 4.78964700  | 7.22679300  |
| H                                  | 9.10200500  | 6.85849100  | 8.35502600  |
| N                                  | 9.40206800  | 3.41159100  | 8.16693900  |
| H                                  | 9.36782300  | 2.77481500  | 7.35683100  |
| C                                  | 8.51514000  | 2.92403800  | 9.22520700  |
| C                                  | 8.96717100  | 2.92068100  | 10.54704100 |
| C                                  | 7.22895800  | 2.49105000  | 8.89138500  |
| C                                  | 8.10819500  | 2.47373000  | 11.55656500 |
| H                                  | 9.97972600  | 3.25716100  | 10.78141300 |
| C                                  | 6.37978700  | 2.04669400  | 9.90952100  |
| H                                  | 6.89798900  | 2.49362300  | 7.85112100  |
| C                                  | 6.81614900  | 2.03905700  | 11.24004800 |
| H                                  | 8.45462700  | 2.46374700  | 12.59233000 |
| H                                  | 5.37435900  | 1.70158000  | 9.65840600  |
| H                                  | 6.14883300  | 1.68924500  | 12.03109400 |
| H                                  | 10.37941700 | 3.38663800  | 8.49393700  |
| H                                  | 5.10632900  | 3.35517200  | 1.28399300  |
| H                                  | 4.87538800  | 1.43933000  | 2.87151500  |
| H                                  | 5.88961300  | 1.59704000  | 5.15070800  |
| H                                  | 8.51401800  | 5.65923500  | 9.52814100  |
| H                                  | 10.26720000 | 5.80550100  | 9.18672000  |
| <b><i>E-IM8a</i><sup>CSS</sup></b> |             |             |             |
| Co                                 | 9.58276400  | 6.22986000  | 4.52805500  |
| C                                  | 7.25525200  | 7.82345500  | 2.73945100  |
| O                                  | 9.57551500  | 10.02255400 | 6.29528100  |
| N                                  | 9.66156000  | 8.27448400  | 4.87845100  |
| P                                  | 7.44435400  | 6.68763100  | 4.19454400  |
| N                                  | 9.81876300  | 6.18246200  | 2.50251400  |
| O                                  | 9.83519300  | 6.74006300  | 0.32173000  |
| C                                  | 6.18009500  | 8.72667100  | 2.71251700  |
| H                                  | 5.49418500  | 8.77393200  | 3.56035100  |
| C                                  | 5.95781400  | 9.56579300  | 1.61647600  |
| H                                  | 5.11160200  | 10.25682400 | 1.62662700  |
| C                                  | 6.81521800  | 9.51063900  | 0.51372000  |
| H                                  | 6.65144700  | 10.15993500 | -0.34924200 |
| C                                  | 7.88994000  | 8.62270000  | 0.51996800  |

|   |             |             |             |
|---|-------------|-------------|-------------|
| H | 8.56802700  | 8.57782100  | -0.33237900 |
| C | 8.12810700  | 7.77748300  | 1.62375700  |
| C | 9.27777200  | 6.86670000  | 1.54562500  |
| C | 10.88065800 | 5.34595600  | 1.89406400  |
| H | 11.78191700 | 5.44760000  | 2.50715500  |
| C | 11.06708800 | 6.00254000  | 0.50994100  |
| H | 11.89973600 | 6.72216300  | 0.49466600  |
| H | 11.17128400 | 5.29227700  | -0.31898500 |
| C | 4.94285100  | 8.41125600  | 7.05657200  |
| H | 3.90149300  | 8.30324300  | 7.36894800  |
| C | 5.43111700  | 7.62906800  | 6.00231900  |
| H | 4.75049500  | 6.93498400  | 5.50873900  |
| C | 6.76217700  | 7.72973800  | 5.56904500  |
| C | 7.10261200  | 9.46297500  | 7.26437200  |
| H | 7.76289500  | 10.18806800 | 7.74086200  |
| C | 5.78353900  | 9.32416100  | 7.69678000  |
| H | 5.41355400  | 9.93509200  | 8.52319000  |
| C | 8.97662000  | 8.94002500  | 5.75396100  |
| C | 7.60403400  | 8.68161500  | 6.20514900  |
| C | 10.95910600 | 9.97502000  | 5.85592100  |
| H | 11.55732800 | 9.55768600  | 6.68109700  |
| H | 11.28337300 | 11.00013300 | 5.64019100  |
| C | 10.91695800 | 9.04579900  | 4.63455000  |
| H | 11.72724900 | 8.30565300  | 4.63676700  |
| C | 6.10523300  | 5.45348600  | 3.85645800  |
| C | 5.56359100  | 4.66311900  | 4.89188400  |
| H | 5.87909100  | 4.81745400  | 5.92645300  |
| C | 4.60535500  | 3.68270500  | 4.61454900  |
| C | 4.18555600  | 3.45735800  | 3.29818000  |
| C | 4.72625300  | 4.22450000  | 2.26152100  |
| C | 5.67429500  | 5.21704100  | 2.53739500  |
| H | 6.07142800  | 5.81377800  | 1.71405600  |
| C | 10.48546100 | 3.87870600  | 1.80074600  |
| C | 11.45898100 | 2.88423500  | 1.99381500  |
| C | 9.18472100  | 3.48680800  | 1.44089600  |
| C | 11.14145300 | 1.52983500  | 1.83386800  |
| H | 12.47678000 | 3.17433400  | 2.26870000  |
| C | 8.86483200  | 2.13390700  | 1.28107800  |
| H | 8.40838900  | 4.24068200  | 1.28977700  |
| C | 9.84225900  | 1.14999300  | 1.47631000  |
| H | 11.91223600 | 0.77021300  | 1.98922600  |
| H | 7.84639400  | 1.84797400  | 1.00517500  |
| H | 9.59191400  | 0.09325500  | 1.35214600  |
| C | 10.88662900 | 9.77982500  | 3.30303600  |

|   |             |             |             |
|---|-------------|-------------|-------------|
| C | 11.84123400 | 9.47811400  | 2.31847300  |
| C | 9.95197900  | 10.80000000 | 3.04461400  |
| C | 11.86569900 | 10.17611900 | 1.10391500  |
| H | 12.57398000 | 8.68982700  | 2.50974900  |
| C | 9.97620500  | 11.50061400 | 1.83450000  |
| H | 9.20141700  | 11.05941100 | 3.79649500  |
| C | 10.93371600 | 11.19063400 | 0.85940000  |
| H | 12.61754200 | 9.92803300  | 0.34993400  |
| H | 9.24531900  | 12.29267300 | 1.65189800  |
| H | 10.95292200 | 11.73945800 | -0.08572900 |
| C | 10.19507000 | 6.04607400  | 7.46230600  |
| C | 9.28682800  | 5.54460900  | 6.35947400  |
| C | 9.64581200  | 4.47932300  | 5.44069000  |
| H | 10.68945000 | 4.14335800  | 5.47070600  |
| C | 8.73993300  | 3.32528700  | 5.15869600  |
| H | 7.67957700  | 3.58599600  | 5.08628800  |
| H | 9.03463600  | 2.74607000  | 4.27426800  |
| O | 11.51899200 | 6.34290200  | 4.64639200  |
| C | 12.49986500 | 5.42708000  | 4.95447400  |
| H | 13.50219100 | 5.89201900  | 4.81310600  |
| H | 12.49252300 | 5.06052200  | 6.01095400  |
| H | 12.50349600 | 4.50780200  | 4.31920800  |
| H | 9.85087900  | 7.02267300  | 7.84485100  |
| H | 8.22788400  | 5.54681000  | 6.66965800  |
| H | 4.40543200  | 4.05963800  | 1.22984200  |
| H | 3.43858900  | 2.68921100  | 3.08337000  |
| H | 4.18614700  | 3.09230800  | 5.43293500  |
| H | 10.21315200 | 5.35678000  | 8.33055300  |
| H | 11.22563100 | 6.17527500  | 7.10457700  |
| N | 8.81441100  | 2.30320400  | 6.32575000  |
| H | 9.81095200  | 2.09687300  | 6.48984200  |
| C | 8.07711600  | 1.05157300  | 6.13394300  |
| C | 6.78009000  | 0.93913900  | 6.63802300  |
| C | 8.68156600  | 0.01317900  | 5.42100700  |
| C | 6.07239600  | -0.24815800 | 6.42188800  |
| H | 6.33442000  | 1.76391600  | 7.19871000  |
| C | 7.96318200  | -1.16791000 | 5.21121600  |
| H | 9.70007700  | 0.12543100  | 5.04232700  |
| C | 6.66083600  | -1.29905500 | 5.70880700  |
| H | 5.05902100  | -0.34993200 | 6.81662200  |
| H | 8.42708600  | -1.98910500 | 4.66034800  |
| H | 6.10473900  | -2.22479100 | 5.54385800  |
| H | 8.48620900  | 2.77888900  | 7.17891600  |

*E-IM8b*<sup>CSS</sup>

|   |             |             |             |
|---|-------------|-------------|-------------|
| C | 11.45608500 | 7.50188600  | 28.21170800 |
| O | 8.93969300  | 1.82381700  | 27.64201200 |
| N | 9.72193100  | 3.55766100  | 26.43642200 |
| P | 10.91975000 | 5.83217900  | 27.62188600 |
| N | 11.47251600 | 5.59713400  | 24.74666900 |
| O | 13.51933200 | 5.10173300  | 23.95332300 |
| C | 12.78969100 | 7.92583900  | 28.05302500 |
| H | 13.54292900 | 7.23962700  | 27.66195400 |
| C | 13.17172700 | 9.22859500  | 28.39532900 |
| C | 9.63670100  | 4.91617000  | 31.47250600 |
| H | 9.70285300  | 5.36985500  | 32.46419800 |
| C | 10.23151200 | 5.55499900  | 30.37768700 |
| H | 10.75951300 | 6.49687900  | 30.53580200 |
| C | 10.16447600 | 5.00475500  | 29.08965700 |
| C | 10.51606300 | 8.42225200  | 28.71933800 |
| H | 9.47467800  | 8.12686700  | 28.85573300 |
| C | 10.90241500 | 9.72051700  | 29.06742800 |
| C | 12.23096300 | 10.12992600 | 28.90364500 |
| C | 8.96890200  | 3.70194400  | 31.29279800 |
| H | 8.50143000  | 3.19613600  | 32.14056400 |
| C | 8.90177200  | 3.13149700  | 30.02116500 |
| H | 8.38704900  | 2.18167100  | 29.87389200 |
| C | 9.39683400  | 3.09528600  | 27.60614500 |
| C | 9.48832200  | 3.76814800  | 28.90974100 |
| C | 8.74213900  | 1.43136500  | 26.25920900 |
| H | 7.67580800  | 1.56668500  | 26.01862900 |
| H | 9.01861200  | 0.37512500  | 26.16096400 |
| C | 9.64411700  | 2.40486600  | 25.48805700 |
| H | 9.18623400  | 2.76149100  | 24.56204500 |
| C | 12.54362400 | 4.94055100  | 27.51715000 |
| C | 13.15613700 | 4.49748900  | 28.70087300 |
| H | 12.65244000 | 4.64916900  | 29.65742600 |
| C | 14.40665000 | 3.87198700  | 28.68630400 |
| H | 14.85688500 | 3.54033800  | 29.62488000 |
| C | 15.07320900 | 3.67935000  | 27.47259300 |
| H | 16.05093400 | 3.19298300  | 27.44827100 |
| C | 14.48130200 | 4.10772800  | 26.28522100 |
| H | 14.98991500 | 3.95473500  | 25.33334100 |
| C | 13.21850700 | 4.73499600  | 26.28880000 |
| C | 12.66718600 | 5.16655700  | 24.99886500 |
| C | 12.71602900 | 5.32568000  | 22.76765900 |
| H | 12.49463200 | 4.34540100  | 22.31831500 |
| H | 13.30062400 | 5.93511000  | 22.06844500 |
| C | 11.45949300 | 6.01904500  | 23.32578400 |



|    |             |             |             |
|----|-------------|-------------|-------------|
| H  | 10.53317900 | 5.62832600  | 22.88372300 |
| C  | 8.39341700  | 7.81186500  | 24.46884800 |
| H  | 9.15573200  | 8.47412400  | 24.04286600 |
| H  | 8.15172600  | 7.01711700  | 23.75500600 |
| C  | 8.76074900  | 7.25360800  | 25.80443600 |
| H  | 9.19578300  | 8.00485400  | 26.47899400 |
| C  | 7.96029600  | 6.20271900  | 26.40742100 |
| H  | 7.19955800  | 5.77460700  | 25.74148400 |
| Co | 9.71757200  | 5.51409100  | 25.80190900 |
| C  | 11.01477100 | 1.82739600  | 25.16403700 |
| C  | 11.45326900 | 1.78249200  | 23.83110100 |
| C  | 11.83299000 | 1.26729900  | 26.16259200 |
| C  | 12.68086400 | 1.19478700  | 23.49895700 |
| H  | 10.82164900 | 2.20589100  | 23.04556900 |
| C  | 13.05711900 | 0.67697000  | 25.83285700 |
| H  | 11.51053200 | 1.27912500  | 27.20714000 |
| C  | 13.48606200 | 0.64000700  | 24.49940200 |
| H  | 13.00533400 | 1.16838400  | 22.45536800 |
| H  | 13.67853600 | 0.24303500  | 26.62043000 |
| H  | 14.44282600 | 0.17788900  | 24.24278900 |
| C  | 11.51381900 | 7.53091000  | 23.15569700 |
| C  | 11.05300000 | 8.08946000  | 21.95014100 |
| C  | 12.05983100 | 8.38300300  | 24.12801600 |
| C  | 11.13566300 | 9.46697900  | 21.72179700 |
| H  | 10.62155000 | 7.43672600  | 21.18557800 |
| C  | 12.13757300 | 9.76350900  | 23.90403100 |
| H  | 12.41599200 | 7.97088700  | 25.07462100 |
| C  | 11.67696800 | 10.31064900 | 22.70101600 |
| H  | 10.77153000 | 9.88410500  | 20.77904700 |
| H  | 12.55960700 | 10.41258400 | 24.67597300 |
| H  | 11.73786400 | 11.38801900 | 22.52659500 |
| N  | 7.11008500  | 8.69581300  | 24.51247200 |
| H  | 6.79386700  | 8.83687300  | 23.54210200 |
| C  | 7.24869600  | 9.99742600  | 25.16897400 |
| C  | 6.93095200  | 10.12069600 | 26.52291000 |
| C  | 7.72923900  | 11.07990400 | 24.42705500 |
| C  | 7.09880100  | 11.36226700 | 27.14654900 |
| H  | 6.55018500  | 9.26156000  | 27.07901000 |
| C  | 7.89109800  | 12.31545000 | 25.06151500 |
| H  | 7.96876900  | 10.95863500 | 23.36806000 |
| C  | 7.57854100  | 12.45730800 | 26.41916600 |
| H  | 6.84864900  | 11.47073900 | 28.20429300 |
| H  | 8.25996900  | 13.16971300 | 24.48942500 |
| H  | 7.70546600  | 13.42513000 | 26.90977600 |

|                                |             |             |             |
|--------------------------------|-------------|-------------|-------------|
| H                              | 6.36788200  | 8.14986800  | 24.97387300 |
| C                              | 7.43337200  | 6.26589000  | 27.82657100 |
| H                              | 6.49699100  | 6.85712600  | 27.87105300 |
| H                              | 7.18810500  | 5.26350400  | 28.21631100 |
| H                              | 8.13920600  | 6.72511300  | 28.53405800 |
| H                              | 14.21291000 | 9.53459300  | 28.26573900 |
| H                              | 12.53066400 | 11.14577400 | 29.17295800 |
| H                              | 10.15820200 | 10.41418200 | 29.46670300 |
| O                              | 8.96409800  | 4.94394100  | 24.10424100 |
| C                              | 7.67768100  | 4.51283700  | 23.85425400 |
| H                              | 7.64222700  | 3.95536800  | 22.89091100 |
| H                              | 7.25833000  | 3.82119900  | 24.62411000 |
| H                              | 6.92208200  | 5.33235800  | 23.74571600 |
| <b>IM10</b> <sup>triplet</sup> |             |             |             |
| Co                             | 9.37583700  | 5.45504300  | 4.82427600  |
| C                              | 7.66748200  | 7.43368700  | 2.55931700  |
| O                              | 9.08207300  | 9.42850200  | 6.54721500  |
| N                              | 9.51412500  | 7.59837800  | 5.31536000  |
| P                              | 7.35117900  | 6.23236400  | 3.90758100  |
| N                              | 10.04624500 | 5.43152200  | 2.87877800  |
| O                              | 10.39989200 | 5.85988100  | 0.70822100  |
| C                              | 6.79937400  | 8.51360700  | 2.34143800  |
| H                              | 5.93953900  | 8.65588300  | 2.99939100  |
| C                              | 7.01136900  | 9.40667100  | 1.28535800  |
| H                              | 6.32275600  | 10.24135600 | 1.13563200  |
| C                              | 8.09471100  | 9.22012900  | 0.42336100  |
| H                              | 8.26535500  | 9.90795900  | -0.40747200 |
| C                              | 8.96952600  | 8.15173400  | 0.62725200  |
| H                              | 9.82105800  | 8.00954000  | -0.03804300 |
| C                              | 8.77762700  | 7.25773500  | 1.69825600  |
| C                              | 9.74606200  | 6.15082700  | 1.83578100  |
| C                              | 11.00320200 | 4.37660500  | 2.43370900  |
| H                              | 11.88505200 | 4.39524000  | 3.08351200  |
| C                              | 11.39113800 | 4.84814700  | 1.01671300  |
| H                              | 12.37908600 | 5.32873000  | 0.98525900  |
| H                              | 11.32673800 | 4.06726700  | 0.24956900  |
| C                              | 4.39696400  | 7.81476000  | 6.33406800  |
| H                              | 3.31751500  | 7.69026600  | 6.44665600  |
| C                              | 5.07762600  | 7.08715000  | 5.35033400  |
| H                              | 4.51759900  | 6.40710100  | 4.70617500  |
| C                              | 6.46214100  | 7.22242800  | 5.17554100  |
| C                              | 6.47637400  | 8.84505700  | 7.00034500  |
| H                              | 7.02939400  | 9.53054500  | 7.64289300  |
| C                              | 5.09738000  | 8.69635600  | 7.15954800  |

|   |             |             |            |
|---|-------------|-------------|------------|
| H | 4.57541100  | 9.26897400  | 7.92909600 |
| C | 8.63184800  | 8.32955200  | 5.92103800 |
| C | 7.17504500  | 8.11296900  | 6.02227400 |
| C | 10.53036700 | 9.37233100  | 6.50666000 |
| H | 10.88059300 | 9.06732700  | 7.50374400 |
| H | 10.90418100 | 10.37559500 | 6.27045100 |
| C | 10.82425300 | 8.30982500  | 5.42926000 |
| H | 11.57708400 | 7.60129900  | 5.79114400 |
| C | 6.10265200  | 5.07107200  | 3.23538000 |
| C | 5.79989100  | 3.92709000  | 4.00081400 |
| H | 6.28387700  | 3.77563500  | 4.96847600 |
| C | 4.87960500  | 2.98756800  | 3.52843000 |
| C | 4.26606300  | 3.16868000  | 2.28190800 |
| C | 4.57296400  | 4.29580300  | 1.51183100 |
| C | 5.48542100  | 5.24661200  | 1.98424800 |
| H | 5.71065800  | 6.12397000  | 1.37473900 |
| C | 10.39225900 | 2.98581500  | 2.48964100 |
| C | 11.12879900 | 1.92817600  | 3.04757000 |
| C | 9.12240400  | 2.71851900  | 1.94932100 |
| C | 10.60796500 | 0.62874500  | 3.06913900 |
| H | 12.11968400 | 2.12442800  | 3.46627800 |
| C | 8.59915800  | 1.42128400  | 1.97471600 |
| H | 8.53271600  | 3.52323300  | 1.50239500 |
| C | 9.33957800  | 0.37304800  | 2.53596100 |
| H | 11.19362700 | -0.18343300 | 3.50733000 |
| H | 7.60836100  | 1.22944300  | 1.55518700 |
| H | 8.92885300  | -0.63958400 | 2.55607600 |
| C | 11.30669900 | 8.87213700  | 4.10042700 |
| C | 12.44225100 | 8.32197200  | 3.48493300 |
| C | 10.67306500 | 9.97160400  | 3.49418400 |
| C | 12.93783500 | 8.85511200  | 2.28861600 |
| H | 12.95023000 | 7.47496500  | 3.95415600 |
| C | 11.17193700 | 10.51112700 | 2.30407100 |
| H | 9.78813600  | 10.41974800 | 3.95494100 |
| C | 12.30549900 | 9.95412600  | 1.69730300 |
| H | 13.82515400 | 8.41643300  | 1.82478700 |
| H | 10.67336000 | 11.37028800 | 1.84834900 |
| H | 12.69483000 | 10.37853100 | 0.76836300 |
| C | 11.98569100 | 4.35858200  | 9.31764300 |
| C | 11.71960700 | 4.13782900  | 7.85917400 |
| C | 11.46065600 | 5.11254200  | 6.95783000 |
| H | 11.44923500 | 6.14859700  | 7.32476500 |
| C | 11.20081900 | 4.91340700  | 5.52595200 |
| H | 11.33448400 | 3.86689900  | 5.21144700 |

|                                |             |             |             |
|--------------------------------|-------------|-------------|-------------|
| H                              | 11.80207800 | 5.58837000  | 4.89324700  |
| H                              | 11.24357400 | 3.82879800  | 9.94263000  |
| N                              | 8.47230300  | 4.93937400  | 6.36329200  |
| C                              | 8.36148300  | 3.72483100  | 6.99297800  |
| C                              | 7.76867800  | 3.61412100  | 8.28072000  |
| C                              | 8.80981400  | 2.52957400  | 6.37106200  |
| C                              | 7.63821300  | 2.37421600  | 8.90675000  |
| H                              | 7.41313500  | 4.52205200  | 8.77721500  |
| C                              | 8.67601900  | 1.29624700  | 7.00927400  |
| H                              | 9.25328800  | 2.59112100  | 5.37460100  |
| C                              | 8.09152800  | 1.20245500  | 8.28176900  |
| H                              | 7.17790100  | 2.32180300  | 9.89768900  |
| H                              | 9.02813000  | 0.39302800  | 6.50261500  |
| H                              | 7.98702500  | 0.23335700  | 8.77551000  |
| H                              | 7.98295600  | 5.67673500  | 6.87635800  |
| H                              | 11.74656700 | 3.09601200  | 7.51206700  |
| H                              | 4.09892700  | 4.44131400  | 0.53797600  |
| H                              | 3.55144400  | 2.42978200  | 1.91092300  |
| H                              | 4.64746900  | 2.10753500  | 4.13322300  |
| H                              | 12.97405300 | 3.95995100  | 9.61052400  |
| H                              | 11.95415900 | 5.42776900  | 9.58116300  |
| <b>IM10</b> <sup>triplet</sup> |             |             |             |
| Co                             | 9.50533900  | 5.53259900  | 5.02513300  |
| C                              | 9.02498500  | 8.40084100  | 3.15585000  |
| O                              | 12.77747300 | 5.75614600  | 2.20444000  |
| N                              | 10.81110000 | 5.59090600  | 3.27788300  |
| P                              | 9.74557800  | 7.86146000  | 4.75282400  |
| N                              | 7.63377000  | 5.80575500  | 4.21672900  |
| O                              | 5.87978000  | 6.53889900  | 3.03161600  |
| C                              | 9.59510100  | 9.45478200  | 2.42694400  |
| H                              | 10.49618900 | 9.94525800  | 2.80099600  |
| C                              | 9.02005800  | 9.89693600  | 1.23031800  |
| H                              | 9.48295600  | 10.71807700 | 0.67830200  |
| C                              | 7.85366400  | 9.29351600  | 0.75415800  |
| H                              | 7.39394000  | 9.63494800  | -0.17568000 |
| C                              | 7.27334700  | 8.24305000  | 1.46717700  |
| H                              | 6.36889100  | 7.76383900  | 1.09272100  |
| C                              | 7.85329000  | 7.77648700  | 2.66248900  |
| C                              | 7.16913100  | 6.66467200  | 3.35476000  |
| C                              | 6.48866400  | 4.96605700  | 4.67285300  |
| H                              | 6.74987400  | 3.90865300  | 4.55371300  |
| C                              | 5.37431600  | 5.34191400  | 3.67416000  |
| H                              | 5.22942400  | 4.58118700  | 2.89424200  |
| H                              | 4.41505900  | 5.58998500  | 4.14370400  |

|   |             |             |             |
|---|-------------|-------------|-------------|
| C | 13.43695800 | 9.68023300  | 5.17316000  |
| H | 13.83016800 | 10.55729900 | 5.69230500  |
| C | 12.07087400 | 9.38418100  | 5.25459700  |
| H | 11.41654500 | 10.03674500 | 5.83518900  |
| C | 11.53070400 | 8.26836300  | 4.59976600  |
| C | 13.76645800 | 7.74394900  | 3.76865800  |
| H | 14.42414000 | 7.09768100  | 3.18687900  |
| C | 14.28599000 | 8.85947200  | 4.42835400  |
| H | 15.35266500 | 9.08297700  | 4.35897700  |
| C | 11.92664100 | 6.23242800  | 3.12637600  |
| C | 12.39719700 | 7.42971100  | 3.84911300  |
| C | 12.23673100 | 4.49057300  | 1.74497900  |
| H | 12.82992800 | 3.68755400  | 2.20668000  |
| H | 12.34113400 | 4.45230600  | 0.65428000  |
| C | 10.77967500 | 4.51002800  | 2.24915900  |
| H | 10.54004700 | 3.56818300  | 2.75373400  |
| C | 9.09011500  | 9.03762000  | 5.99705600  |
| C | 9.29612000  | 8.72092700  | 7.35462100  |
| H | 9.84136500  | 7.81333100  | 7.62355000  |
| C | 8.80840200  | 9.56430900  | 8.35635600  |
| C | 8.09441200  | 10.72045800 | 8.01553100  |
| C | 7.87306100  | 11.03158200 | 6.66921700  |
| C | 8.36918000  | 10.19705300 | 5.66051800  |
| H | 8.19358000  | 10.45495100 | 4.61415100  |
| C | 6.13136200  | 5.21129600  | 6.12999100  |
| C | 5.83560200  | 4.11600700  | 6.95801700  |
| C | 6.03277300  | 6.50962100  | 6.65850000  |
| C | 5.44644800  | 4.31119500  | 8.28830100  |
| H | 5.90904300  | 3.10217500  | 6.55506900  |
| C | 5.64681400  | 6.70536700  | 7.98936700  |
| H | 6.25896900  | 7.37709200  | 6.03300500  |
| C | 5.35267200  | 5.60752300  | 8.80771800  |
| H | 5.21950700  | 3.44828500  | 8.91960500  |
| H | 5.57534200  | 7.72043200  | 8.38803600  |
| H | 5.05224300  | 5.76280500  | 9.84703200  |
| C | 9.73794300  | 4.75963800  | 1.16973600  |
| C | 8.60498500  | 3.93430100  | 1.09097200  |
| C | 9.90594200  | 5.77273200  | 0.20861800  |
| C | 7.65728800  | 4.11369200  | 0.07566100  |
| H | 8.46854400  | 3.13689100  | 1.82640000  |
| C | 8.96513100  | 5.94769800  | -0.81137800 |
| H | 10.78093600 | 6.42783000  | 0.24667000  |
| C | 7.83767600  | 5.11876000  | -0.88080400 |
| H | 6.78271700  | 3.45969600  | 0.02743200  |

|                     |             |             |             |
|---------------------|-------------|-------------|-------------|
| H                   | 9.11341400  | 6.73408200  | -1.55573300 |
| H                   | 7.10468300  | 5.25534600  | -1.68000000 |
| N                   | 10.85371300 | 5.56074600  | 6.31294800  |
| C                   | 9.22180100  | 3.53278600  | 5.16869400  |
| H                   | 8.52413200  | 3.54452400  | 6.02241100  |
| H                   | 8.69576200  | 3.26190500  | 4.23931000  |
| C                   | 10.39572700 | 2.68663300  | 5.42056500  |
| H                   | 10.89573700 | 2.81974100  | 6.38827400  |
| C                   | 10.89585200 | 1.74796800  | 4.58343100  |
| H                   | 10.39536600 | 1.57418900  | 3.62068100  |
| H                   | 7.31294800  | 11.93001000 | 6.39827400  |
| H                   | 7.70733800  | 11.37604600 | 8.79957300  |
| H                   | 8.97942100  | 9.31232400  | 9.40581300  |
| C                   | 12.08891400 | 0.88677500  | 4.86974700  |
| H                   | 12.87549300 | 1.02667600  | 4.10560400  |
| H                   | 12.52546900 | 1.11033200  | 5.85594100  |
| H                   | 11.82434500 | -0.18591900 | 4.84384800  |
| C                   | 10.89868700 | 5.17681200  | 7.63106800  |
| C                   | 9.72407400  | 4.80918100  | 8.33977300  |
| C                   | 12.12946100 | 5.15498300  | 8.34401900  |
| C                   | 9.78660500  | 4.42814200  | 9.68077200  |
| H                   | 8.76259600  | 4.84332300  | 7.82277000  |
| C                   | 12.17723200 | 4.77474900  | 9.68499800  |
| H                   | 13.04569800 | 5.44222700  | 7.81911100  |
| C                   | 11.00907500 | 4.40411700  | 10.36869700 |
| H                   | 8.86350900  | 4.15275600  | 10.19909700 |
| H                   | 13.14006800 | 4.76687600  | 10.20408400 |
| H                   | 11.05032500 | 4.10675500  | 11.41924600 |
| H                   | 11.75863300 | 5.92328300  | 6.00276400  |
| <b>IM11</b> triplet |             |             |             |
| Co                  | 10.43058500 | 5.28369300  | 5.25545200  |
| C                   | 8.21586600  | 8.05567500  | 5.46338500  |
| O                   | 7.27483100  | 4.25438900  | 7.83689600  |
| N                   | 9.08268200  | 5.06385300  | 6.79110700  |
| P                   | 8.66192200  | 6.66009400  | 4.33224600  |
| N                   | 11.13762500 | 7.19206900  | 5.99748000  |
| O                   | 11.36256700 | 9.17359500  | 7.02448700  |
| C                   | 6.89412300  | 8.53298300  | 5.45072500  |
| H                   | 6.16105000  | 8.06773800  | 4.78869700  |
| C                   | 6.49413100  | 9.60005900  | 6.26042800  |
| H                   | 5.45921100  | 9.94789400  | 6.22532100  |
| C                   | 7.42195900  | 10.21557100 | 7.10445700  |
| H                   | 7.12397500  | 11.05136500 | 7.74119200  |
| C                   | 8.73806700  | 9.75644200  | 7.13371000  |

|   |             |             |            |
|---|-------------|-------------|------------|
| H | 9.46536300  | 10.23073500 | 7.79217700 |
| C | 9.15060400  | 8.67546400  | 6.32766100 |
| C | 10.56581500 | 8.27430800  | 6.42286200 |
| C | 12.59928300 | 7.38319100  | 6.17755200 |
| H | 13.04769700 | 6.46781600  | 6.58509100 |
| C | 12.64487500 | 8.52333800  | 7.21247900 |
| H | 12.68667800 | 8.15630500  | 8.24827400 |
| H | 13.43236600 | 9.26492700  | 7.03763000 |
| C | 5.01867000  | 4.87263900  | 3.47777600 |
| H | 4.30459200  | 4.87526600  | 2.65089400 |
| C | 6.18178100  | 5.64601200  | 3.39041800 |
| H | 6.35646900  | 6.25075700  | 2.49863700 |
| C | 7.12066600  | 5.66485800  | 4.43112400 |
| C | 5.69369600  | 4.12114800  | 5.67117000 |
| H | 5.50630000  | 3.52296900  | 6.56288700 |
| C | 4.77194500  | 4.11253900  | 4.62321300 |
| H | 3.86528700  | 3.50931800  | 4.70425600 |
| C | 7.81361800  | 4.77795200  | 6.73241800 |
| C | 6.87942800  | 4.87873500  | 5.59004100 |
| C | 8.33244500  | 4.04866600  | 8.80446100 |
| H | 8.42551500  | 2.96817900  | 8.97703900 |
| H | 8.03640400  | 4.55077100  | 9.73410000 |
| C | 9.58567800  | 4.66728500  | 8.13754700 |
| H | 10.34762300 | 3.89123800  | 7.97413000 |
| C | 8.67352100  | 7.42863600  | 2.66367400 |
| C | 8.96169300  | 6.60136800  | 1.55801800 |
| H | 9.09894400  | 5.52697600  | 1.69957500 |
| C | 9.06429800  | 7.14444500  | 0.27416900 |
| C | 8.90479900  | 8.52204900  | 0.07703200 |
| C | 8.63588200  | 9.35192900  | 1.17043800 |
| C | 8.51769600  | 8.81174800  | 2.45688500 |
| H | 8.30349300  | 9.47579200  | 3.29644000 |
| C | 13.31914600 | 7.76958200  | 4.89112300 |
| C | 14.68296000 | 7.45887000  | 4.76015800 |
| C | 12.69590900 | 8.51771400  | 3.87986300 |
| C | 15.40996000 | 7.88772500  | 3.64380600 |
| H | 15.18095000 | 6.87702100  | 5.54078100 |
| C | 13.42055700 | 8.94256700  | 2.75999600 |
| H | 11.63307800 | 8.76046700  | 3.95314800 |
| C | 14.78048600 | 8.63142900  | 2.63859200 |
| H | 16.46985900 | 7.63440500  | 3.55741400 |
| H | 12.91768700 | 9.51829300  | 1.97840600 |
| H | 15.34511700 | 8.96361200  | 1.76362600 |
| C | 10.20376300 | 5.77154600  | 8.97594900 |

|                                             |             |             |             |
|---------------------------------------------|-------------|-------------|-------------|
| C                                           | 11.48284100 | 5.58120200  | 9.52245200  |
| C                                           | 9.47758700  | 6.92131100  | 9.33105800  |
| C                                           | 12.02767300 | 6.51776400  | 10.41017700 |
| H                                           | 12.05043400 | 4.68357700  | 9.26147800  |
| C                                           | 10.02436500 | 7.86260700  | 10.20865600 |
| H                                           | 8.47277900  | 7.07845400  | 8.93000100  |
| C                                           | 11.29915300 | 7.66155700  | 10.75492500 |
| H                                           | 13.02153100 | 6.35099900  | 10.83331300 |
| H                                           | 9.44900100  | 8.75264300  | 10.47580600 |
| H                                           | 11.72001200 | 8.39338800  | 11.44904500 |
| C                                           | 9.48693500  | 3.11883100  | 3.41095200  |
| C                                           | 10.19341000 | 3.22596600  | 4.75340800  |
| C                                           | 9.58697400  | 2.38810100  | 5.80144800  |
| H                                           | 8.49030700  | 2.33083500  | 5.81795100  |
| C                                           | 10.27301000 | 1.64007400  | 6.69166900  |
| H                                           | 11.36875000 | 1.63136100  | 6.70930400  |
| H                                           | 9.76120400  | 1.00397200  | 7.42033900  |
| H                                           | 11.26609400 | 3.00468600  | 4.67014600  |
| H                                           | 9.99454600  | 3.71020200  | 2.63663500  |
| N                                           | 11.67690400 | 5.34497500  | 3.88322600  |
| H                                           | 11.39601600 | 5.93058300  | 3.09348300  |
| C                                           | 12.83005100 | 4.65444000  | 3.61386300  |
| C                                           | 13.41642300 | 4.67248700  | 2.31785300  |
| C                                           | 13.50727200 | 3.92153600  | 4.62743100  |
| C                                           | 14.60776300 | 3.99623800  | 2.05715700  |
| H                                           | 12.91642400 | 5.23397200  | 1.52305600  |
| C                                           | 14.69520000 | 3.24236500  | 4.35124200  |
| H                                           | 13.09499500 | 3.91258500  | 5.63962000  |
| C                                           | 15.25844600 | 3.27032900  | 3.06705300  |
| H                                           | 15.03374400 | 4.03226800  | 1.05030600  |
| H                                           | 15.19351700 | 2.69078000  | 5.15365200  |
| H                                           | 16.19003400 | 2.73931400  | 2.85725500  |
| H                                           | 8.51233100  | 10.42816400 | 1.02594100  |
| H                                           | 8.99366900  | 8.94640600  | -0.92606600 |
| H                                           | 9.27755800  | 6.48871100  | -0.57366500 |
| H                                           | 9.47565200  | 2.06418000  | 3.07274300  |
| H                                           | 8.43651200  | 3.44520800  | 3.46916700  |
| <b>IM13</b> <sup>triplet</sup> - <i>exo</i> |             |             |             |
| Co                                          | 9.15321900  | 5.63365200  | 5.62522800  |
| C                                           | 7.61794400  | 8.70260300  | 5.04900200  |
| O                                           | 10.13191200 | 7.43269700  | 9.41005400  |
| N                                           | 9.91472800  | 6.80236800  | 7.26830800  |
| P                                           | 7.25582300  | 7.03285200  | 5.77418800  |
| N                                           | 7.31351100  | 6.67117900  | 2.81652000  |



|   |             |             |             |
|---|-------------|-------------|-------------|
| O | 8.14434400  | 8.21377600  | 1.38999400  |
| C | 7.72709800  | 9.80291800  | 5.91715200  |
| H | 7.53440500  | 9.67261300  | 6.98229400  |
| C | 8.07421600  | 11.07773600 | 5.45576000  |
| H | 8.14426100  | 11.90542800 | 6.16541100  |
| C | 8.32597100  | 11.28095300 | 4.09875200  |
| H | 8.59940900  | 12.26983200 | 3.72414100  |
| C | 8.21994900  | 10.20583400 | 3.21585800  |
| H | 8.40646600  | 10.35324900 | 2.15188400  |
| C | 7.86831700  | 8.91798000  | 3.66295800  |
| C | 7.75432300  | 7.86153300  | 2.63975500  |
| C | 7.35630000  | 5.98226400  | 1.51154200  |
| H | 8.06343500  | 5.14289400  | 1.59110100  |
| C | 7.91004200  | 7.06563100  | 0.54210300  |
| H | 8.86355200  | 6.78136600  | 0.07714600  |
| H | 7.19453800  | 7.35886300  | -0.23951500 |
| C | 5.22996600  | 7.99601400  | 9.27362400  |
| H | 4.18575700  | 8.20206200  | 9.51980100  |
| C | 5.58118800  | 7.71203900  | 7.94952800  |
| H | 4.79214300  | 7.70620300  | 7.19857200  |
| C | 6.90589400  | 7.44051200  | 7.56644900  |
| C | 7.53407500  | 7.74755800  | 9.91444800  |
| H | 8.30876000  | 7.75583800  | 10.68064900 |
| C | 6.21123800  | 8.01284300  | 10.26430900 |
| H | 5.95439100  | 8.22863900  | 11.30357400 |
| C | 9.33430500  | 7.20815800  | 8.35056500  |
| C | 7.90105400  | 7.46143200  | 8.58368700  |
| C | 11.44724500 | 6.93625300  | 9.06086900  |
| H | 11.58942800 | 5.97074300  | 9.56900900  |
| H | 12.19073500 | 7.65988400  | 9.41498700  |
| C | 11.37851900 | 6.79354100  | 7.52399800  |
| H | 11.79363900 | 5.82755000  | 7.20873000  |
| C | 5.55690600  | 6.61947700  | 5.18638900  |
| C | 5.10362100  | 5.29367000  | 5.27791800  |
| H | 5.77050800  | 4.50922500  | 5.63748300  |
| C | 3.79482900  | 4.96527400  | 4.90642400  |
| C | 2.92602800  | 5.95729200  | 4.43880300  |
| C | 3.37407600  | 7.28025200  | 4.33956800  |
| C | 4.68140000  | 7.61198300  | 4.71007500  |
| H | 5.01561600  | 8.64919600  | 4.63276800  |
| C | 6.00684500  | 5.41144100  | 1.10443900  |
| C | 5.86684100  | 4.03646800  | 0.85911000  |
| C | 4.88625700  | 6.24485300  | 0.93989900  |
| C | 4.63734900  | 3.50255300  | 0.45242800  |

|   |             |             |             |
|---|-------------|-------------|-------------|
| H | 6.73174800  | 3.37845800  | 0.98398300  |
| C | 3.65773200  | 5.71465600  | 0.53327800  |
| H | 4.97307000  | 7.31833800  | 1.13064800  |
| C | 3.52958900  | 4.34102900  | 0.28721200  |
| H | 4.54698600  | 2.42972800  | 0.26272700  |
| H | 2.79610600  | 6.37585100  | 0.40892100  |
| H | 2.56943500  | 3.92772200  | -0.03236800 |
| C | 12.11904000 | 7.90062700  | 6.78892700  |
| C | 13.37044600 | 7.63039600  | 6.21169400  |
| C | 11.61848200 | 9.21300500  | 6.74172800  |
| C | 14.11077900 | 8.65075300  | 5.60365300  |
| H | 13.76659700 | 6.61145300  | 6.23989000  |
| C | 12.35513600 | 10.23268100 | 6.12839000  |
| H | 10.64654600 | 9.44575300  | 7.18397400  |
| C | 13.60480000 | 9.95535100  | 5.55997400  |
| H | 15.08308300 | 8.42413900  | 5.15860700  |
| H | 11.95153000 | 11.24796800 | 6.09662300  |
| H | 14.18027000 | 10.75258600 | 5.08273000  |
| C | 7.51901200  | 4.07810000  | 8.11667000  |
| C | 8.24920200  | 4.03301600  | 6.80630000  |
| C | 9.64347900  | 3.88815600  | 6.71788100  |
| H | 10.25358200 | 4.03222200  | 7.61680000  |
| C | 10.25356000 | 3.88410800  | 5.45246300  |
| H | 9.70029800  | 3.46662600  | 4.60299800  |
| H | 11.34122700 | 3.91835700  | 5.35337000  |
| H | 7.67276900  | 3.67527300  | 5.94094200  |
| H | 8.13265900  | 4.52492900  | 8.91269900  |
| N | 10.19004100 | 6.64114100  | 4.45488600  |
| C | 10.84751200 | 6.48224700  | 3.25955100  |
| C | 10.74212000 | 5.29571000  | 2.48555400  |
| C | 11.66569300 | 7.52830300  | 2.74553200  |
| C | 11.43534700 | 5.16061100  | 1.28253800  |
| H | 10.10288500 | 4.48568300  | 2.83613100  |
| C | 12.35101200 | 7.38280200  | 1.54082100  |
| H | 11.75053800 | 8.45617900  | 3.31781400  |
| C | 12.24893900 | 6.19630200  | 0.79815600  |
| H | 11.33651800 | 4.23298400  | 0.71185000  |
| H | 12.97460800 | 8.20419400  | 1.17692500  |
| H | 12.79057100 | 6.08258400  | -0.14387200 |
| H | 10.38445300 | 7.56768500  | 4.84484800  |
| H | 6.56973800  | 4.62858700  | 8.04829300  |
| H | 7.27051600  | 3.04584500  | 8.42579300  |
| H | 2.70327600  | 8.06113200  | 3.97230700  |
| H | 1.90436100  | 5.70056400  | 4.14815300  |

|                            |             |             |             |
|----------------------------|-------------|-------------|-------------|
| H                          | 3.45644000  | 3.92892300  | 4.98222900  |
| (R)-TSS <sup>triplet</sup> |             |             |             |
| Co                         | 9.72857800  | 5.40504100  | 4.77791400  |
| C                          | 7.80474100  | 7.24976800  | 2.79639500  |
| O                          | 9.53731000  | 9.27124500  | 6.63467900  |
| N                          | 9.85397000  | 7.50285900  | 5.27842300  |
| P                          | 7.62165300  | 6.01456800  | 4.15726300  |
| N                          | 10.28163700 | 5.38250600  | 2.86903900  |
| O                          | 10.39158400 | 5.77485000  | 0.66082900  |
| C                          | 6.87242900  | 8.29066900  | 2.66665400  |
| H                          | 6.07557400  | 8.39497700  | 3.40605000  |
| C                          | 6.93143900  | 9.18877500  | 1.59553800  |
| H                          | 6.19316900  | 9.99059100  | 1.52034000  |
| C                          | 7.92391800  | 9.04685900  | 0.62186600  |
| H                          | 7.97355000  | 9.73713200  | -0.22301400 |
| C                          | 8.86069100  | 8.01949100  | 0.73365800  |
| H                          | 9.64202200  | 7.90833800  | -0.01844700 |
| C                          | 8.82427900  | 7.12349100  | 1.82050000  |
| C                          | 9.84739600  | 6.06554600  | 1.85191600  |
| C                          | 11.21201700 | 4.34311200  | 2.33848200  |
| H                          | 12.14763600 | 4.36718400  | 2.90716800  |
| C                          | 11.46175500 | 4.82748400  | 0.89517300  |
| H                          | 12.41592400 | 5.36481000  | 0.79274000  |
| H                          | 11.39098100 | 4.03902000  | 0.13637800  |
| C                          | 4.87697900  | 7.57812000  | 6.84826200  |
| H                          | 3.81464300  | 7.43750000  | 7.06095200  |
| C                          | 5.47365800  | 6.85674600  | 5.80784400  |
| H                          | 4.86076500  | 6.17002300  | 5.22236500  |
| C                          | 6.83459700  | 7.00614200  | 5.49945300  |
| C                          | 6.98941400  | 8.64934000  | 7.30526400  |
| H                          | 7.58921000  | 9.35263600  | 7.88345600  |
| C                          | 5.63686200  | 8.47653500  | 7.60072900  |
| H                          | 5.18068700  | 9.04507600  | 8.41395600  |
| C                          | 9.03467300  | 8.18389600  | 6.01655300  |
| C                          | 7.60608700  | 7.92465600  | 6.26643800  |
| C                          | 10.97136700 | 9.23617200  | 6.42645100  |
| H                          | 11.43677200 | 8.85825700  | 7.34941600  |
| H                          | 11.31315200 | 10.25861900 | 6.22717900  |
| C                          | 11.13898800 | 8.26368600  | 5.24350700  |
| H                          | 11.96752300 | 7.57035900  | 5.42385100  |
| C                          | 6.28494100  | 4.91403900  | 3.52009300  |
| C                          | 5.80284200  | 3.87974700  | 4.34836500  |
| H                          | 6.17717100  | 3.77723900  | 5.36904900  |
| C                          | 4.83963000  | 2.98326300  | 3.87695800  |

|   |             |             |            |
|---|-------------|-------------|------------|
| C | 4.35639500  | 3.09100100  | 2.56681500 |
| C | 4.83829000  | 4.10555700  | 1.73329000 |
| C | 5.79358400  | 5.01427600  | 2.20496600 |
| H | 6.15128500  | 5.80237000  | 1.53992800 |
| C | 10.61822900 | 2.94686200  | 2.44371700 |
| C | 11.39015200 | 1.89967700  | 2.97247400 |
| C | 9.32285500  | 2.66475800  | 1.97573600 |
| C | 10.87981100 | 0.59719900  | 3.03594700 |
| H | 12.40119300 | 2.10635400  | 3.33407500 |
| C | 8.81087300  | 1.36467300  | 2.04061500 |
| H | 8.70414400  | 3.46031500  | 1.55235600 |
| C | 9.58763900  | 0.32680500  | 2.57193200 |
| H | 11.49373800 | -0.20636300 | 3.45078800 |
| H | 7.80113100  | 1.16195500  | 1.67468800 |
| H | 9.18653200  | -0.68863400 | 2.62266400 |
| C | 11.37907300 | 8.94874700  | 3.90653100 |
| C | 12.44672600 | 8.53927900  | 3.09237500 |
| C | 10.58783300 | 10.03505800 | 3.49107400 |
| C | 12.72259300 | 9.19961000  | 1.88818700 |
| H | 13.07432300 | 7.70235900  | 3.41105400 |
| C | 10.86587000 | 10.69974700 | 2.29279000 |
| H | 9.75291500  | 10.37524000 | 4.10993400 |
| C | 11.93483600 | 10.28428400 | 1.48766700 |
| H | 13.56034900 | 8.87049900  | 1.26786800 |
| H | 10.24642700 | 11.54655300 | 1.98664400 |
| H | 12.15295600 | 10.80652200 | 0.55258000 |
| C | 10.80042300 | 5.02040900  | 9.15895500 |
| C | 10.98088000 | 4.53146900  | 7.75721900 |
| C | 11.71614700 | 5.21516300  | 6.77947300 |
| H | 12.08934700 | 6.21596700  | 7.02879300 |
| C | 11.71633400 | 4.79848200  | 5.43415000 |
| H | 11.58960200 | 3.72675500  | 5.23170500 |
| H | 12.38830600 | 5.31901200  | 4.74123200 |
| H | 9.80951400  | 4.74031400  | 9.55503000 |
| N | 9.12045300  | 4.86782900  | 6.59776300 |
| C | 8.33918600  | 3.75274400  | 6.88985800 |
| C | 7.37832400  | 3.76202500  | 7.93059400 |
| C | 8.54162100  | 2.54493900  | 6.17806200 |
| C | 6.64360100  | 2.61271000  | 8.23451300 |
| H | 7.20803900  | 4.68825500  | 8.48690200 |
| C | 7.80745600  | 1.40122000  | 6.49318400 |
| H | 9.28155500  | 2.52389100  | 5.37397300 |
| C | 6.85174900  | 1.42432000  | 7.52089400 |
| H | 5.90069000  | 2.64636300  | 9.03634700 |

|                                 |             |             |            |
|---------------------------------|-------------|-------------|------------|
| H                               | 7.97955200  | 0.48072400  | 5.92870400 |
| H                               | 6.27719200  | 0.52666800  | 7.76194900 |
| H                               | 8.81186100  | 5.66115100  | 7.16946500 |
| H                               | 10.80388800 | 3.46346400  | 7.59572500 |
| H                               | 4.46806100  | 4.19812000  | 0.70917800 |
| H                               | 3.60794400  | 2.38541400  | 2.19761200 |
| H                               | 4.47052300  | 2.19387300  | 4.53642300 |
| H                               | 11.54414200 | 4.55248300  | 9.83167500 |
| H                               | 10.91560900 | 6.11295300  | 9.23290000 |
| <b>(S)-TS<sup>triplet</sup></b> |             |             |            |
| Co                              | 9.39034700  | 5.35558300  | 4.81122000 |
| C                               | 9.13088500  | 8.33292200  | 3.29788800 |
| O                               | 12.64280100 | 5.64430600  | 1.90414900 |
| N                               | 10.69868500 | 5.45053700  | 3.02532700 |
| P                               | 9.83604100  | 7.61136400  | 4.84244700 |
| N                               | 7.55418600  | 5.75754500  | 4.07431000 |
| O                               | 5.83490500  | 6.75396100  | 3.02825100 |
| C                               | 9.77829400  | 9.40506800  | 2.66294600 |
| H                               | 10.71979000 | 9.78060300  | 3.06880500 |
| C                               | 9.23179900  | 10.01527100 | 1.52906600 |
| H                               | 9.75796900  | 10.84723200 | 1.05530900 |
| C                               | 8.01117500  | 9.56608000  | 1.01768700 |
| H                               | 7.57174700  | 10.03913300 | 0.13683600 |
| C                               | 7.35287500  | 8.50245500  | 1.63418600 |
| H                               | 6.40653600  | 8.14041900  | 1.23260500 |
| C                               | 7.90476600  | 7.86614300  | 2.76419800 |
| C                               | 7.13981300  | 6.74357000  | 3.33487300 |
| C                               | 6.35985700  | 4.94985700  | 4.44527300 |
| H                               | 6.54074400  | 3.90051700  | 4.18588000 |
| C                               | 5.25825200  | 5.52418500  | 3.52675900 |
| H                               | 5.04925000  | 4.87550000  | 2.66426400 |
| H                               | 4.32447100  | 5.77188200  | 4.04594700 |
| C                               | 13.66518800 | 9.14094800  | 5.25480600 |
| H                               | 14.14247900 | 9.92193900  | 5.85128800 |
| C                               | 12.28983900 | 8.91674300  | 5.38356100 |
| H                               | 11.71331500 | 9.53381900  | 6.07454800 |
| C                               | 11.63802000 | 7.92398400  | 4.63601900 |
| C                               | 13.78576100 | 7.38626700  | 3.60284800 |
| H                               | 14.36603200 | 6.78435500  | 2.90342600 |
| C                               | 14.41542400 | 8.37452400  | 4.36026200 |
| H                               | 15.48871300 | 8.54294500  | 4.24880000 |
| C                               | 11.83766000 | 6.05624700  | 2.90031600 |
| C                               | 12.40455000 | 7.13900000  | 3.73050500 |
| C                               | 12.02095900 | 4.49192200  | 1.29110400 |

|   |             |             |             |
|---|-------------|-------------|-------------|
| H | 12.62719400 | 3.60851800  | 1.53723600  |
| H | 12.01571400 | 4.64500800  | 0.20466600  |
| C | 10.61260700 | 4.44252800  | 1.92776700  |
| H | 10.44532300 | 3.45634000  | 2.38072100  |
| C | 9.29107300  | 8.79450300  | 6.14551000  |
| C | 9.58123500  | 8.47860400  | 7.48829700  |
| H | 10.14493700 | 7.57417900  | 7.72805800  |
| C | 9.15758700  | 9.31915000  | 8.52166800  |
| C | 8.42131700  | 10.47495200 | 8.23207300  |
| C | 8.11728700  | 10.78864600 | 6.90306100  |
| C | 8.55076500  | 9.95709400  | 5.86338200  |
| H | 8.30954000  | 10.22117400 | 4.83212900  |
| C | 6.04281200  | 5.04217600  | 5.92923900  |
| C | 5.60057000  | 3.89964300  | 6.61614100  |
| C | 6.12492900  | 6.26200200  | 6.62164000  |
| C | 5.24487200  | 3.97322100  | 7.96801300  |
| H | 5.53250600  | 2.94554600  | 6.08585100  |
| C | 5.77189900  | 6.33603400  | 7.97369000  |
| H | 6.46856600  | 7.16295800  | 6.10725600  |
| C | 5.33045600  | 5.19235200  | 8.65071100  |
| H | 4.90347800  | 3.07500500  | 8.48901200  |
| H | 5.84332500  | 7.29127200  | 8.49997900  |
| H | 5.05576500  | 5.25121400  | 9.70697300  |
| C | 9.47288000  | 4.71346100  | 0.96010100  |
| C | 8.39935100  | 3.81285000  | 0.87281400  |
| C | 9.49372800  | 5.82982700  | 0.10614200  |
| C | 7.36651700  | 4.01953500  | -0.05028800 |
| H | 8.37933200  | 2.93713600  | 1.52785500  |
| C | 8.46506700  | 6.03606700  | -0.81844700 |
| H | 10.32164100 | 6.54326200  | 0.15511100  |
| C | 7.39810500  | 5.13147300  | -0.89927100 |
| H | 6.54031900  | 3.30624900  | -0.10991100 |
| H | 8.49653800  | 6.90588500  | -1.47940600 |
| H | 6.59672400  | 5.29157800  | -1.62508700 |
| N | 10.98016000 | 4.95467700  | 5.91845100  |
| C | 9.01806500  | 3.13215900  | 4.93173000  |
| H | 7.98251600  | 2.89339200  | 5.18684200  |
| H | 9.18609400  | 3.39124100  | 3.87442700  |
| C | 10.03658300 | 2.50713700  | 5.65732600  |
| H | 9.77377300  | 1.96717500  | 6.57501000  |
| C | 11.38465900 | 2.84126100  | 5.45179500  |
| H | 11.66821200 | 3.21301500  | 4.46228800  |
| H | 7.54151600  | 11.68753800 | 6.66854500  |
| H | 8.08316300  | 11.12730600 | 9.04107000  |

|                                 |             |             |             |
|---------------------------------|-------------|-------------|-------------|
| H                               | 9.39763800  | 9.06417600  | 9.55685400  |
| C                               | 12.49877000 | 2.31230700  | 6.29754100  |
| H                               | 13.31692400 | 3.04467600  | 6.39280700  |
| H                               | 12.15431300 | 2.03549700  | 7.30582500  |
| H                               | 12.93985600 | 1.41078200  | 5.83096200  |
| C                               | 10.93695600 | 5.03747100  | 7.31147600  |
| C                               | 9.72772900  | 4.77475200  | 7.99914700  |
| C                               | 12.08873900 | 5.33492400  | 8.08025100  |
| C                               | 9.68016500  | 4.80186200  | 9.39472800  |
| H                               | 8.82616600  | 4.57074500  | 7.41671700  |
| C                               | 12.02932400 | 5.36890300  | 9.47576800  |
| H                               | 13.02873900 | 5.55236600  | 7.56460500  |
| C                               | 10.82719000 | 5.09875300  | 10.14510500 |
| H                               | 8.73306600  | 4.60034900  | 9.90290200  |
| H                               | 12.93045600 | 5.61175100  | 10.04599000 |
| H                               | 10.78240100 | 5.12921300  | 11.23656400 |
| H                               | 11.86577500 | 5.35558700  | 5.59014500  |
| <i>E-TS6</i> <sup>triplet</sup> |             |             |             |
| Co                              | 9.15964700  | 5.76065900  | 5.89602900  |
| C                               | 7.29706100  | 8.91728500  | 5.53949000  |
| O                               | 10.14901100 | 8.29689900  | 9.17196800  |
| N                               | 9.96346400  | 7.22980700  | 7.20389700  |
| P                               | 7.19773100  | 7.10575100  | 5.96069600  |
| N                               | 7.64993100  | 7.26423900  | 3.04962500  |
| O                               | 8.46516900  | 9.10248700  | 2.01644600  |
| C                               | 7.01518100  | 9.86492000  | 6.54023700  |
| H                               | 6.71543800  | 9.53172800  | 7.53399700  |
| C                               | 7.10094000  | 11.24089900 | 6.30151100  |
| H                               | 6.86694600  | 11.94083600 | 7.10706200  |
| C                               | 7.47980700  | 11.70773600 | 5.04195400  |
| H                               | 7.55231800  | 12.77921200 | 4.84276800  |
| C                               | 7.76121100  | 10.78890600 | 4.03089800  |
| H                               | 8.05214000  | 11.13750700 | 3.03962800  |
| C                               | 7.66921900  | 9.40245600  | 4.25624300  |
| C                               | 7.92993100  | 8.51451000  | 3.11216200  |
| C                               | 7.95688200  | 6.81776800  | 1.67859400  |
| H                               | 8.64575300  | 5.96298300  | 1.72116400  |
| C                               | 8.66962000  | 8.04795400  | 1.04625600  |
| H                               | 9.75296400  | 7.89420000  | 0.93356200  |
| H                               | 8.23941800  | 8.37295000  | 0.08972900  |
| C                               | 5.40072600  | 6.99207100  | 9.71285000  |
| H                               | 4.39082700  | 6.81449900  | 10.09003500 |
| C                               | 5.63432200  | 6.97411600  | 8.33244900  |
| H                               | 4.79432700  | 6.78936300  | 7.66171900  |

|   |             |             |             |
|---|-------------|-------------|-------------|
| C | 6.91412000  | 7.18772300  | 7.79721300  |
| C | 7.73280800  | 7.46741000  | 10.08800200 |
| H | 8.56190200  | 7.66350800  | 10.76858600 |
| C | 6.45203200  | 7.24283700  | 10.59544700 |
| H | 6.28167000  | 7.26383500  | 11.67398600 |
| C | 9.38463600  | 7.64318600  | 8.28499400  |
| C | 7.98411100  | 7.42939000  | 8.70325400  |
| C | 11.50317900 | 8.31367500  | 8.65710400  |
| H | 12.14170000 | 7.76498900  | 9.36255400  |
| H | 11.82689700 | 9.36095200  | 8.59865700  |
| C | 11.39236800 | 7.62247400  | 7.27150400  |
| H | 11.99587600 | 6.70240400  | 7.25726100  |
| C | 5.56847200  | 6.56640700  | 5.30351500  |
| C | 5.40507800  | 5.21000500  | 4.97308600  |
| H | 6.24383700  | 4.51966000  | 5.08761900  |
| C | 4.17894000  | 4.74371000  | 4.48746300  |
| C | 3.10858000  | 5.63003600  | 4.31856800  |
| C | 3.26804900  | 6.98435600  | 4.63681800  |
| C | 4.49176600  | 7.45357000  | 5.12776100  |
| H | 4.60432400  | 8.51137800  | 5.37737900  |
| C | 6.70880900  | 6.38017400  | 0.92475700  |
| C | 6.79189300  | 5.33408200  | -0.00956700 |
| C | 5.47826400  | 7.03467900  | 1.09946400  |
| C | 5.67192500  | 4.95293900  | -0.75770200 |
| H | 7.74380200  | 4.81491100  | -0.15235200 |
| C | 4.35646800  | 6.65244400  | 0.35470900  |
| H | 5.39332500  | 7.84480300  | 1.82817400  |
| C | 4.44961200  | 5.61122300  | -0.57714300 |
| H | 5.75385300  | 4.13623000  | -1.47988300 |
| H | 3.40472100  | 7.16896500  | 0.50532100  |
| H | 3.57275900  | 5.31248400  | -1.15747100 |
| C | 11.84570200 | 8.50391700  | 6.11994100  |
| C | 13.07654600 | 8.24838700  | 5.49353900  |
| C | 11.09441600 | 9.61885800  | 5.71247300  |
| C | 13.54731200 | 9.08575200  | 4.47453700  |
| H | 13.67198800 | 7.38685100  | 5.80989400  |
| C | 11.56314000 | 10.45474700 | 4.69327900  |
| H | 10.13686200 | 9.83655600  | 6.19280100  |
| C | 12.79003300 | 10.19081600 | 4.07106600  |
| H | 14.50692500 | 8.87279000  | 3.99646600  |
| H | 10.96851500 | 11.31815000 | 4.38489300  |
| H | 13.15379500 | 10.84583300 | 3.27529700  |
| C | 7.38530200  | 3.93305000  | 8.08521700  |
| C | 8.40538400  | 4.01181300  | 6.98887000  |



|                                    |             |            |             |
|------------------------------------|-------------|------------|-------------|
| C                                  | 9.76648700  | 4.26347600 | 7.21731700  |
| H                                  | 10.09046800 | 4.66128000 | 8.18482700  |
| C                                  | 10.72897200 | 4.12592000 | 6.16460600  |
| H                                  | 10.54807600 | 3.35711200 | 5.40782700  |
| H                                  | 11.78012800 | 4.29105100 | 6.41044300  |
| H                                  | 8.15521300  | 3.45820900 | 6.07135400  |
| H                                  | 7.65563700  | 4.55608500 | 8.95005000  |
| N                                  | 10.73405700 | 5.57481700 | 4.66672700  |
| C                                  | 10.87104700 | 4.89038100 | 3.47123000  |
| C                                  | 9.84818300  | 4.02685700 | 3.00669100  |
| C                                  | 12.03828900 | 5.02247400 | 2.67721700  |
| C                                  | 9.98969200  | 3.33524100 | 1.80122300  |
| H                                  | 8.94010700  | 3.91030100 | 3.60469500  |
| C                                  | 12.15819400 | 4.34359500 | 1.46301500  |
| H                                  | 12.84469300 | 5.67506900 | 3.02414100  |
| C                                  | 11.13983300 | 3.49001900 | 1.01397900  |
| H                                  | 9.18634700  | 2.67146500 | 1.46949900  |
| H                                  | 13.06501300 | 4.47488000 | 0.86569000  |
| H                                  | 11.24316700 | 2.95093400 | 0.06928500  |
| H                                  | 11.60049500 | 6.05762800 | 4.90809000  |
| H                                  | 6.38409100  | 4.22462900 | 7.73616800  |
| H                                  | 7.30942400  | 2.88587500 | 8.43368000  |
| H                                  | 2.43649600  | 7.68093000 | 4.50344600  |
| H                                  | 2.15207700  | 5.26679100 | 3.93448300  |
| H                                  | 4.06324100  | 3.68721100 | 4.23296200  |
| <b>(R)-IM12</b> <sup>triplet</sup> |             |            |             |
| Co                                 | 10.10869600 | 5.56311600 | 4.23293200  |
| C                                  | 9.55240300  | 6.03848700 | 0.94862600  |
| O                                  | 7.77262600  | 2.14299800 | 3.20905100  |
| N                                  | 8.67010100  | 4.13218500 | 3.74390100  |
| P                                  | 10.81904100 | 5.29591700 | 2.07645500  |
| N                                  | 9.27371200  | 7.33734900 | 3.75069700  |
| O                                  | 8.46409800  | 9.12171100 | 2.66446300  |
| C                                  | 9.35237400  | 5.48252300 | -0.32546700 |
| H                                  | 9.91461300  | 4.59268900 | -0.61626700 |
| C                                  | 8.45845300  | 6.04958200 | -1.23892500 |
| H                                  | 8.32425900  | 5.59134100 | -2.22155600 |
| C                                  | 7.75285500  | 7.20523700 | -0.89328000 |
| H                                  | 7.05678500  | 7.66249400 | -1.59986500 |
| C                                  | 7.93525100  | 7.77489200 | 0.36644900  |
| H                                  | 7.37814500  | 8.66977900 | 0.64495100  |
| C                                  | 8.81638300  | 7.19904300 | 1.30463100  |
| C                                  | 8.89235500  | 7.85157800 | 2.62494000  |
| C                                  | 9.09490900  | 8.35414400 | 4.81355000  |

|   |             |             |             |
|---|-------------|-------------|-------------|
| H | 8.31220700  | 7.99264100  | 5.49749700  |
| C | 8.59343900  | 9.59424200  | 4.02945500  |
| H | 7.60894200  | 9.94677100  | 4.36233600  |
| H | 9.30919400  | 10.42773200 | 4.02760800  |
| C | 11.79828900 | 1.65021500  | 0.35739800  |
| H | 12.55906300 | 1.28658200  | -0.33729500 |
| C | 11.76954000 | 3.00571500  | 0.70413500  |
| H | 12.50719100 | 3.67956300  | 0.26528800  |
| C | 10.81199700 | 3.51569600  | 1.59474600  |
| C | 9.88243200  | 1.26224400  | 1.77139800  |
| H | 9.13837900  | 0.58452300  | 2.19044000  |
| C | 10.85222300 | 0.77492200  | 0.89467700  |
| H | 10.86421700 | -0.28525800 | 0.63267800  |
| C | 8.77289000  | 3.03465000  | 3.06314800  |
| C | 9.84620900  | 2.62225600  | 2.13878400  |
| C | 6.92181000  | 2.63154700  | 4.27478800  |
| H | 7.12033800  | 2.02532200  | 5.17075400  |
| H | 5.87803200  | 2.50402800  | 3.96298300  |
| C | 7.35736400  | 4.10290700  | 4.44736200  |
| H | 7.52767400  | 4.34336700  | 5.50434100  |
| C | 12.39866900 | 5.97937200  | 1.41895200  |
| C | 13.61789900 | 5.49333100  | 1.93656500  |
| H | 13.62163800 | 4.65894200  | 2.64207000  |
| C | 14.83326500 | 6.05938000  | 1.54203700  |
| C | 14.85291300 | 7.13065000  | 0.63953500  |
| C | 13.64891300 | 7.62714300  | 0.13011800  |
| C | 12.42902800 | 7.05585900  | 0.51314800  |
| H | 11.50076400 | 7.45560500  | 0.10013900  |
| C | 10.36115100 | 8.58438500  | 5.61719800  |
| C | 10.28110900 | 8.77086900  | 7.00631000  |
| C | 11.61802800 | 8.64850500  | 4.99147600  |
| C | 11.43563100 | 9.01599500  | 7.75967900  |
| H | 9.30687600  | 8.72261400  | 7.50098900  |
| C | 12.77291300 | 8.88572200  | 5.74504000  |
| H | 11.69639800 | 8.50552300  | 3.91041000  |
| C | 12.68495800 | 9.07105700  | 7.13085400  |
| H | 11.35821500 | 9.16016400  | 8.84040500  |
| H | 13.74514800 | 8.92723300  | 5.24723500  |
| H | 13.58774700 | 9.25755800  | 7.71798500  |
| C | 6.37570000  | 5.11320900  | 3.87407500  |
| C | 5.79913100  | 6.08218200  | 4.70997300  |
| C | 5.98824900  | 5.06545600  | 2.52310700  |
| C | 4.85852900  | 6.99105300  | 4.20854200  |
| H | 6.08373400  | 6.12072300  | 5.76477200  |

|                                   |             |            |             |
|-----------------------------------|-------------|------------|-------------|
| C                                 | 5.04566200  | 5.96908300 | 2.02200400  |
| H                                 | 6.42010500  | 4.31600000 | 1.85366700  |
| C                                 | 4.47985800  | 6.93670200 | 2.86284000  |
| H                                 | 4.41849800  | 7.73905600 | 4.87321300  |
| H                                 | 4.75210500  | 5.91783900 | 0.97049800  |
| H                                 | 3.74379700  | 7.64253400 | 2.46955300  |
| C                                 | 10.92090200 | 3.46281900 | 8.07050900  |
| C                                 | 10.06914900 | 4.09382500 | 6.95094700  |
| C                                 | 10.95452500 | 4.89246200 | 6.01592700  |
| H                                 | 11.36530200 | 5.81021800 | 6.46484700  |
| C                                 | 11.65475400 | 4.33343200 | 4.94616600  |
| H                                 | 11.50305000 | 3.28528600 | 4.66271000  |
| H                                 | 12.60356500 | 4.77663700 | 4.63042000  |
| H                                 | 10.29187900 | 2.90356300 | 8.78130000  |
| N                                 | 9.01782900  | 4.97131600 | 7.47815000  |
| C                                 | 7.97958900  | 4.52760100 | 8.28319400  |
| C                                 | 7.27952300  | 5.45409600 | 9.09554600  |
| C                                 | 7.54100900  | 3.18182400 | 8.28595300  |
| C                                 | 6.18611100  | 5.05231900 | 9.86302600  |
| H                                 | 7.61000000  | 6.49694400 | 9.11376600  |
| C                                 | 6.44357700  | 2.79412300 | 9.06238500  |
| H                                 | 8.05782300  | 2.43514100 | 7.68030400  |
| C                                 | 5.75303200  | 3.71789800 | 9.85577400  |
| H                                 | 5.66842500  | 5.79269100 | 10.47966000 |
| H                                 | 6.12867700  | 1.74673500 | 9.04440000  |
| H                                 | 4.89848600  | 3.40558600 | 10.46058200 |
| H                                 | 9.35371200  | 5.90372800 | 7.71631900  |
| H                                 | 9.58769500  | 3.28581200 | 6.37652000  |
| H                                 | 13.65317000 | 8.46268500 | -0.57452300 |
| H                                 | 15.80364100 | 7.57595700 | 0.33605800  |
| H                                 | 15.76871900 | 5.66321200 | 1.94505000  |
| H                                 | 11.66065500 | 2.76756100 | 7.64363200  |
| H                                 | 11.46089300 | 4.24567200 | 8.62825200  |
| <b>(S)-IM12<sup>triplet</sup></b> |             |            |             |
| Co                                | 9.23000300  | 5.67959200 | 4.65949600  |
| C                                 | 6.62166200  | 7.31748400 | 3.31034100  |
| O                                 | 9.66371100  | 9.55329000 | 6.34040200  |
| N                                 | 9.55150300  | 7.68684500 | 5.09452500  |
| P                                 | 7.01596800  | 6.22360400 | 4.75156400  |
| N                                 | 9.08656100  | 5.56352600 | 2.61635000  |
| O                                 | 8.45161100  | 5.82133500 | 0.48348200  |
| C                                 | 5.65455000  | 8.32626100 | 3.44879800  |
| H                                 | 5.16411000  | 8.47003900 | 4.41355800  |
| C                                 | 5.29334300  | 9.14585400 | 2.37454800  |

|   |             |             |             |
|---|-------------|-------------|-------------|
| H | 4.53820700  | 9.92258700  | 2.51615600  |
| C | 5.89256000  | 8.95984800  | 1.12607200  |
| H | 5.61592000  | 9.59005800  | 0.27806200  |
| C | 6.85506900  | 7.96364000  | 0.96493100  |
| H | 7.33378100  | 7.82010300  | -0.00399200 |
| C | 7.24051500  | 7.14388300  | 2.04491700  |
| C | 8.29082000  | 6.14487100  | 1.77439300  |
| C | 9.91161500  | 4.59482000  | 1.86133600  |
| H | 10.97021300 | 4.76290400  | 2.10653300  |
| C | 9.63884100  | 4.99319900  | 0.39225800  |
| H | 10.44339800 | 5.60688300  | -0.03737800 |
| H | 9.41258300  | 4.15019600  | -0.27118200 |
| C | 5.22278600  | 8.07859500  | 7.99888900  |
| H | 4.26978300  | 7.99106400  | 8.52585600  |
| C | 5.48099200  | 7.25768700  | 6.89530300  |
| H | 4.71802100  | 6.54604200  | 6.57497100  |
| C | 6.69133400  | 7.33619300  | 6.18851800  |
| C | 7.38828900  | 9.10597200  | 7.72367700  |
| H | 8.14018000  | 9.82746500  | 8.04369700  |
| C | 6.17970900  | 9.00711600  | 8.41372500  |
| H | 5.98992300  | 9.65478000  | 9.27240100  |
| C | 8.97787100  | 8.45740000  | 5.96336800  |
| C | 7.66756600  | 8.27981000  | 6.61668000  |
| C | 10.97325200 | 9.47644600  | 5.72678500  |
| H | 11.70768000 | 9.27593800  | 6.52008300  |
| H | 11.18680700 | 10.44570100 | 5.25895700  |
| C | 10.84978000 | 8.30571200  | 4.72105900  |
| H | 11.64220700 | 7.56336100  | 4.89105200  |
| C | 5.62155500  | 5.01939400  | 4.76193300  |
| C | 5.60403400  | 4.04244800  | 5.78003000  |
| H | 6.36046100  | 4.05807900  | 6.56860400  |
| C | 4.61626900  | 3.05424100  | 5.79895100  |
| C | 3.64434900  | 3.01042500  | 4.79048500  |
| C | 3.66319400  | 3.96529800  | 3.76898800  |
| C | 4.64205200  | 4.96725900  | 3.75384400  |
| H | 4.63593100  | 5.70718500  | 2.95069900  |
| C | 9.56392700  | 3.14525600  | 2.18462700  |
| C | 10.28107900 | 2.11905900  | 1.54226100  |
| C | 8.55840500  | 2.79736500  | 3.09804600  |
| C | 9.99001600  | 0.77650900  | 1.80087100  |
| H | 11.07511400 | 2.37335400  | 0.83416700  |
| C | 8.26974400  | 1.45093100  | 3.36138800  |
| H | 7.99990800  | 3.58294100  | 3.61367500  |
| C | 8.98129100  | 0.43704700  | 2.71275500  |

|                                  |             |             |             |
|----------------------------------|-------------|-------------|-------------|
| H                                | 10.55536000 | -0.00809100 | 1.29130700  |
| H                                | 7.48098500  | 1.19910200  | 4.07508500  |
| H                                | 8.75375100  | -0.61257500 | 2.91551700  |
| C                                | 10.89512500 | 8.72620900  | 3.26112800  |
| C                                | 11.91131700 | 8.24226900  | 2.42301400  |
| C                                | 9.95835900  | 9.63431700  | 2.73716100  |
| C                                | 11.99445200 | 8.65570700  | 1.08731400  |
| H                                | 12.64568400 | 7.53675400  | 2.82128800  |
| C                                | 10.03989900 | 10.04865100 | 1.40393700  |
| H                                | 9.15795600  | 10.02471100 | 3.37219700  |
| C                                | 11.05813700 | 9.56007500  | 0.57438600  |
| H                                | 12.79344100 | 8.27041400  | 0.44853800  |
| H                                | 9.30530100  | 10.75587200 | 1.01052200  |
| H                                | 11.12114700 | 9.88560100  | -0.46708500 |
| N                                | 12.49391200 | 4.57410000  | 4.88288300  |
| C                                | 13.47223700 | 3.83985000  | 4.22722600  |
| C                                | 14.63066200 | 4.49703300  | 3.74261900  |
| C                                | 13.34352000 | 2.45382500  | 3.97223800  |
| C                                | 15.60376600 | 3.80152100  | 3.02493100  |
| H                                | 14.75538500 | 5.56567200  | 3.94218200  |
| C                                | 14.32834500 | 1.76987500  | 3.25117700  |
| H                                | 12.47081900 | 1.90830600  | 4.33504000  |
| C                                | 15.46503500 | 2.42922600  | 2.76847300  |
| H                                | 16.48594100 | 4.33950500  | 2.66607300  |
| H                                | 14.19961600 | 0.69895300  | 3.06914200  |
| H                                | 16.23040000 | 1.88599100  | 2.20923200  |
| H                                | 12.81498100 | 5.49220200  | 5.18866700  |
| C                                | 9.18072900  | 4.73896400  | 6.52609400  |
| H                                | 8.62356500  | 5.35545000  | 7.23778200  |
| H                                | 8.80382200  | 3.71837300  | 6.38829100  |
| C                                | 10.50483400 | 5.03809400  | 6.20708600  |
| H                                | 10.95784800 | 5.93884800  | 6.64521100  |
| C                                | 11.50853500 | 3.97806500  | 5.79349200  |
| H                                | 10.97668700 | 3.18191100  | 5.24887500  |
| H                                | 2.91007300  | 3.93732200  | 2.97732700  |
| H                                | 2.87670800  | 2.23257400  | 4.80144700  |
| H                                | 4.60977000  | 2.31196900  | 6.60120400  |
| C                                | 12.16879500 | 3.36248400  | 7.04349300  |
| H                                | 12.92364300 | 2.61022200  | 6.76374000  |
| H                                | 12.66549500 | 4.14600100  | 7.63933000  |
| H                                | 11.41214000 | 2.87253200  | 7.67618100  |
| <i>E-IM14</i> <sup>triplet</sup> |             |             |             |
| Co                               | 9.09042000  | 6.03492000  | 5.85578700  |
| C                                | 7.19372500  | 9.04634400  | 5.66900500  |

|   |             |             |             |
|---|-------------|-------------|-------------|
| O | 10.02037400 | 8.45149900  | 9.20158200  |
| N | 9.86516000  | 7.35206300  | 7.24852600  |
| P | 7.10059700  | 7.21965300  | 6.02463300  |
| N | 7.67802300  | 7.42314800  | 3.19210800  |
| O | 8.32579600  | 9.31239000  | 2.13405200  |
| C | 6.91648000  | 9.96953000  | 6.69306600  |
| H | 6.61328200  | 9.60964000  | 7.67706900  |
| C | 7.00861800  | 11.35080600 | 6.48806800  |
| H | 6.77986100  | 12.03277000 | 7.31049300  |
| C | 7.38498500  | 11.84727200 | 5.23867300  |
| H | 7.46074300  | 12.92316400 | 5.06610100  |
| C | 7.66070800  | 10.95351000 | 4.20372200  |
| H | 7.95044100  | 11.32665100 | 3.22083400  |
| C | 7.56835900  | 9.56189600  | 4.39676000  |
| C | 7.85620600  | 8.69311900  | 3.24335000  |
| C | 8.01255000  | 6.98459500  | 1.82070900  |
| H | 8.79767900  | 6.21710900  | 1.87346100  |
| C | 8.55980100  | 8.27606700  | 1.14974000  |
| H | 9.64108700  | 8.22746500  | 0.95621400  |
| H | 8.03383900  | 8.55578200  | 0.22685500  |
| C | 5.35155700  | 6.85955600  | 9.78950200  |
| H | 4.36020600  | 6.61033200  | 10.17542800 |
| C | 5.56165600  | 6.90716200  | 8.40576400  |
| H | 4.72236600  | 6.70348500  | 7.73931700  |
| C | 6.81875600  | 7.21300100  | 7.86102200  |
| C | 7.66050700  | 7.45224600  | 10.14956500 |
| H | 8.48882700  | 7.66861800  | 10.82538500 |
| C | 6.40112100  | 7.14086800  | 10.66558900 |
| H | 6.24604700  | 7.11695700  | 11.74641900 |
| C | 9.27335100  | 7.75592300  | 8.32742200  |
| C | 7.89066500  | 7.47147400  | 8.76114500  |
| C | 11.30652100 | 8.68134000  | 8.57387700  |
| H | 12.09338900 | 8.45927600  | 9.30452600  |
| H | 11.35195200 | 9.74097100  | 8.28148300  |
| C | 11.29662100 | 7.72644300  | 7.35983900  |
| H | 11.85151500 | 6.80397000  | 7.59718000  |
| C | 5.46318500  | 6.74492700  | 5.32652000  |
| C | 5.31080000  | 5.44869200  | 4.80488500  |
| H | 6.16375700  | 4.76620300  | 4.79797400  |
| C | 4.08202000  | 5.03605800  | 4.27852800  |
| C | 2.99634100  | 5.91956500  | 4.25658100  |
| C | 3.14426600  | 7.21766200  | 4.76014800  |
| C | 4.37099200  | 7.63074400  | 5.29253400  |
| H | 4.47338000  | 8.64624800  | 5.68305400  |

|   |             |             |             |
|---|-------------|-------------|-------------|
| C | 6.80433700  | 6.37653500  | 1.12350500  |
| C | 6.85176100  | 5.05892300  | 0.64307300  |
| C | 5.62540100  | 7.12165200  | 0.94226700  |
| C | 5.74655200  | 4.49331000  | -0.00582100 |
| H | 7.76412400  | 4.47106500  | 0.77780700  |
| C | 4.52076600  | 6.55914300  | 0.29517500  |
| H | 5.56562700  | 8.14953800  | 1.31183700  |
| C | 4.57801400  | 5.24211200  | -0.18109600 |
| H | 5.80051200  | 3.46538100  | -0.37391700 |
| H | 3.61060200  | 7.14997000  | 0.16267900  |
| H | 3.71383500  | 4.80316400  | -0.68641800 |
| C | 11.88961900 | 8.32579900  | 6.10120800  |
| C | 13.19168900 | 7.97284100  | 5.70901200  |
| C | 11.18121800 | 9.26953100  | 5.33899700  |
| C | 13.77667600 | 8.55295500  | 4.57639000  |
| H | 13.75223600 | 7.24057000  | 6.29713300  |
| C | 11.76114800 | 9.84182300  | 4.20183700  |
| H | 10.16796500 | 9.55235800  | 5.63397700  |
| C | 13.06132500 | 9.48699400  | 3.81848500  |
| H | 14.79151700 | 8.27063700  | 4.28498800  |
| H | 11.19517200 | 10.56707400 | 3.61186100  |
| H | 13.51414300 | 9.93737600  | 2.93158400  |
| C | 7.41838500  | 3.74272800  | 7.36388800  |
| C | 8.55356200  | 4.04385700  | 6.41726400  |
| C | 9.83134800  | 4.35961000  | 6.87410600  |
| H | 9.98168400  | 4.49859400  | 7.95153900  |
| C | 11.07961900 | 4.24729300  | 6.02403700  |
| H | 11.25278100 | 3.22478500  | 5.64916000  |
| H | 11.96353700 | 4.52976000  | 6.61198700  |
| H | 8.44590500  | 3.62834500  | 5.40457000  |
| H | 7.58071200  | 4.20865700  | 8.34799300  |
| N | 10.97081300 | 5.18893700  | 4.87351700  |
| C | 10.98191000 | 4.69831200  | 3.54284300  |
| C | 10.42135900 | 3.45503000  | 3.19548800  |
| C | 11.55226600 | 5.49221100  | 2.52731300  |
| C | 10.44015300 | 3.02154800  | 1.86463600  |
| H | 9.97021400  | 2.81895200  | 3.95872000  |
| C | 11.56211900 | 5.05205300  | 1.20164700  |
| H | 11.99737800 | 6.45612800  | 2.78889700  |
| C | 11.00767700 | 3.81165600  | 0.85843600  |
| H | 10.00332500 | 2.05033300  | 1.61737000  |
| H | 12.01662100 | 5.68270600  | 0.43290200  |
| H | 11.02063600 | 3.46559800  | -0.17766300 |
| H | 11.65268900 | 5.94514100  | 4.96150700  |

|   |            |            |            |
|---|------------|------------|------------|
| H | 6.44301800 | 4.07808800 | 6.98082500 |
| H | 7.34149900 | 2.65051600 | 7.52310600 |
| H | 2.30190000 | 7.91385500 | 4.73907100 |
| H | 2.03759700 | 5.59946700 | 3.84074900 |
| H | 3.97662800 | 4.02590600 | 3.87500300 |
